# Supplementary material for: Diethylamine Dess–Martin periodinane: an efficient catalyst–oxidant combination in a sequential, one-pot synthesis of difficult to access 2-amino-3,5-dicarbonitrile-6-sulfanylpyridines at ambient temperature
Source: Royal Society of Chemistry journal article supplement (doi:10.1039/c7ra07738f), 2017-01-01
Supplement: c7ra07738f1.pdf [file c7ra07738f1.pdf]

## Supporting Information

### Diethylamine - Dess Martin periodinane: An efficient catalyst - oxidant combination in sequential, one-pot synthesis of difficult to access 2-amino-3,5-dicarbonitrile-6-sulfanylpyridines

R. V. Kupwade;<sup>a</sup> S. S. Khot;<sup>a</sup> M. A. Kulkarni;<sup>a</sup> U. V. Desai;<sup>a</sup> P. P. Wadgaonkar<sup>b</sup>

<sup>a</sup>Department of Chemistry, Shivaji University, Kolhapur, Maharashtra, India.

<sup>b</sup>Polymer Science and Engineering Division, CSIR National Chemical Laboratory, Pune, India.

E mail: [uvdchem2011@gmail.com](mailto:uvdchem2011@gmail.com); [uprabhu\\_desai@rediffmail.com](mailto:uprabhu_desai@rediffmail.com)

#### **Representative procedure for sequential, one-pot synthesis of 2-amino-3,5-dicarbonitrile - 6-sulfanylpyridines:**

To a well-stirred solution of 2,6-disubstituted benzaldehyde, malononitrile and thiol (1: 2:1 mmol) in ethanol (3 mL) was added diethylamine (20 mol %) and stirring was continued at ambient temperature. Upon completion of the reaction (TLC), resultant dihydropyridine, was (***either isolated or***) dissolved using dimethylformamide (2 ml). To the resulting solution, Dess Martin periodinane (1 mmol) was added and stirring continued. In most of the cases, an exothermic reaction took place. Upon completion of oxidation (TLC) water (10 mL) was added and stirring was continued till free flowing solid separates out. Resultant solid was filtered, washed with water, dried, washed again with chloroform and dried. Resultant 2-amino-3,5-dicarbonitrile-6-sulfanylpyridine, was found to be pure and did not require any further purification.

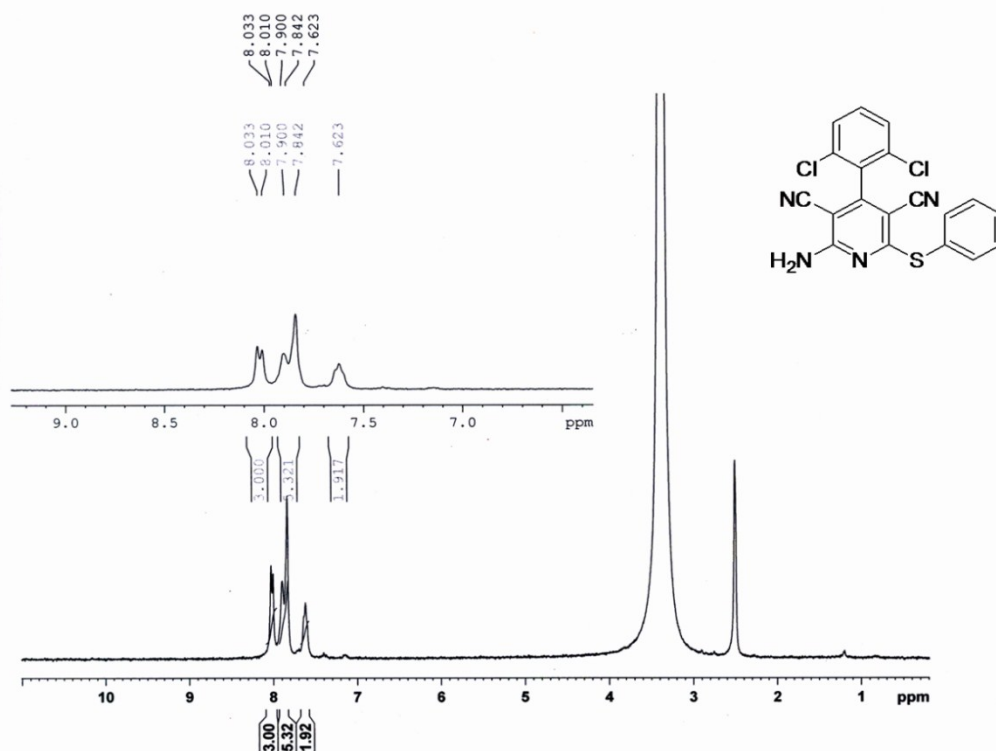

Spectrum 1. <sup>1</sup>H – NMR of compound 5a

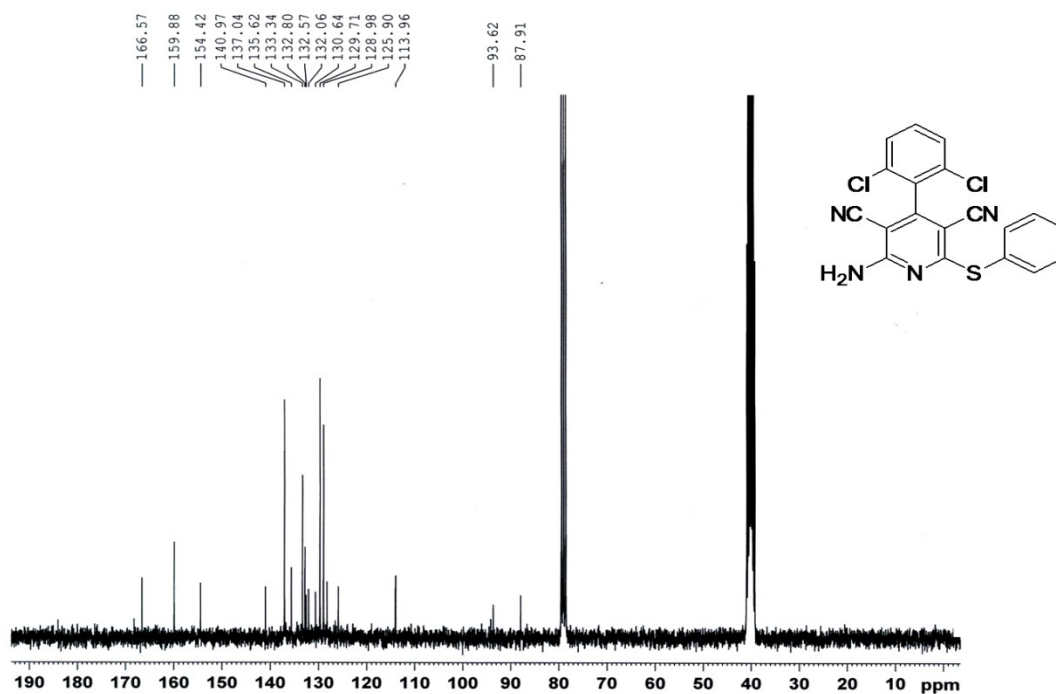

Spectrum 2. <sup>13</sup>C – NMR of compound 5a

RK-9\_161121123956#119 RT: 0.53 AV: 1 NL: 3.03E7  
T: FTMS + p ESI Full ms [100.00-1500.00]

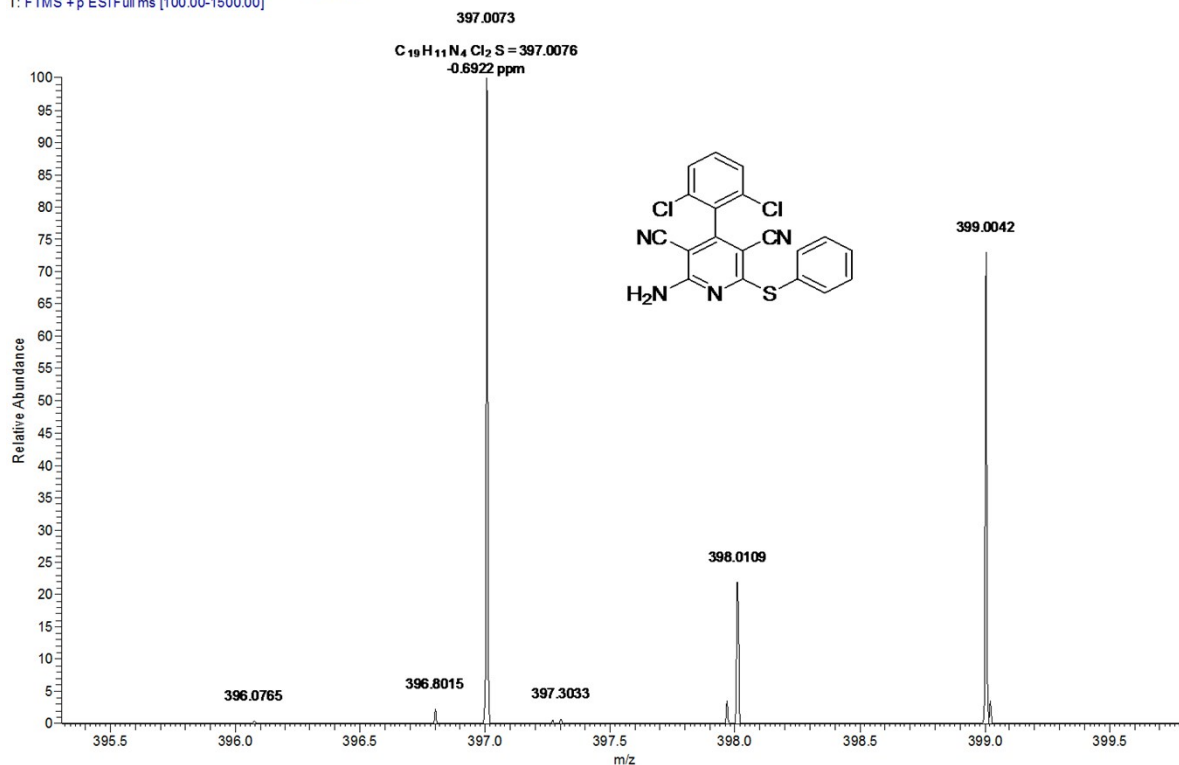

Spectrum 3. HRMS of compound 5a

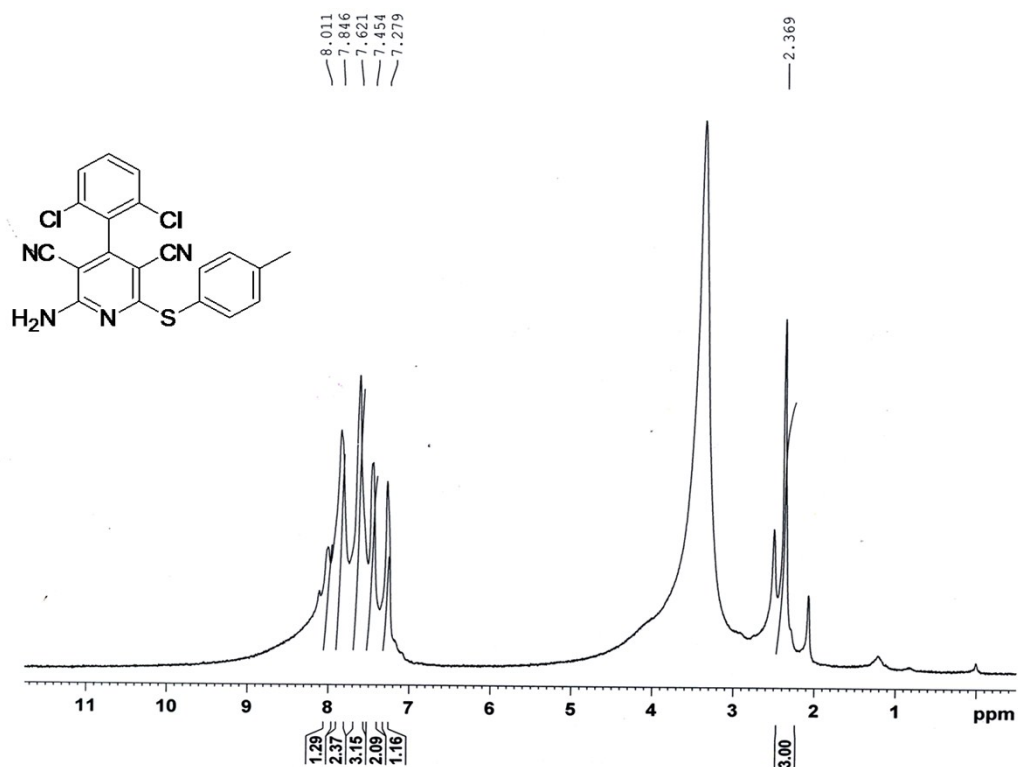

Spectrum 4. <sup>1</sup>H – NMR of compound 5b

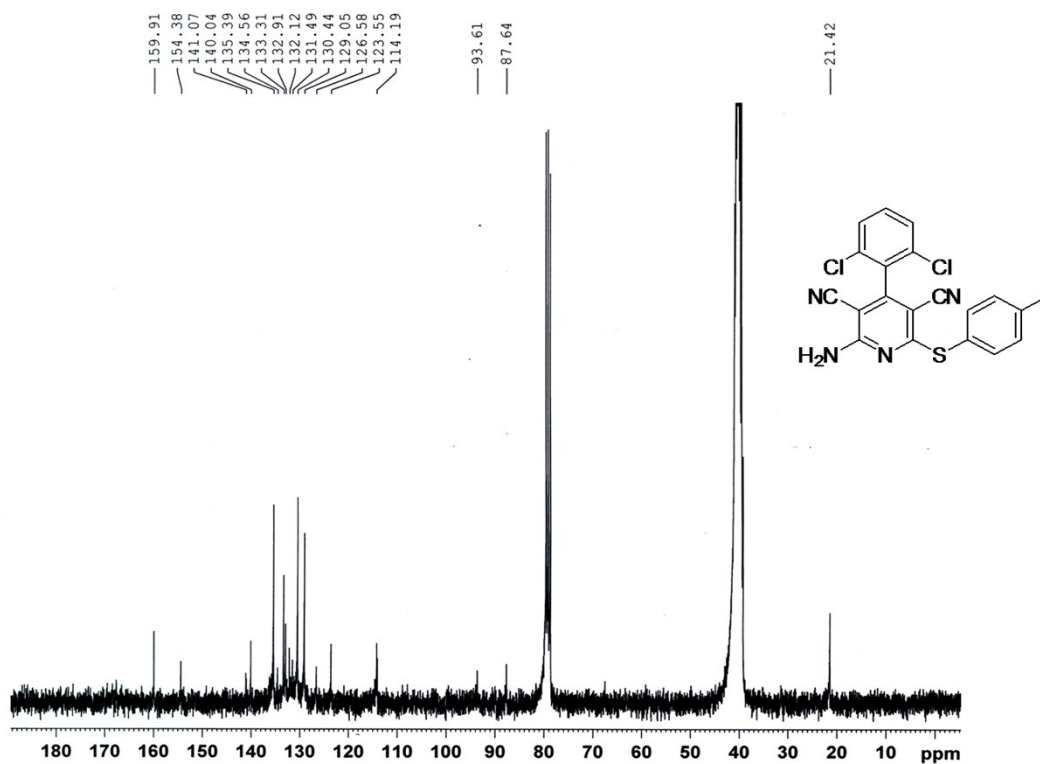

Spectrum 5. <sup>13</sup>C – NMR of compound 5b

RK-8\_161121123645 #138 RT: 0.61 AV: 1 NL: 3.25E7  
T: FTMS + p ESI Full ms [100.00-1500.00]

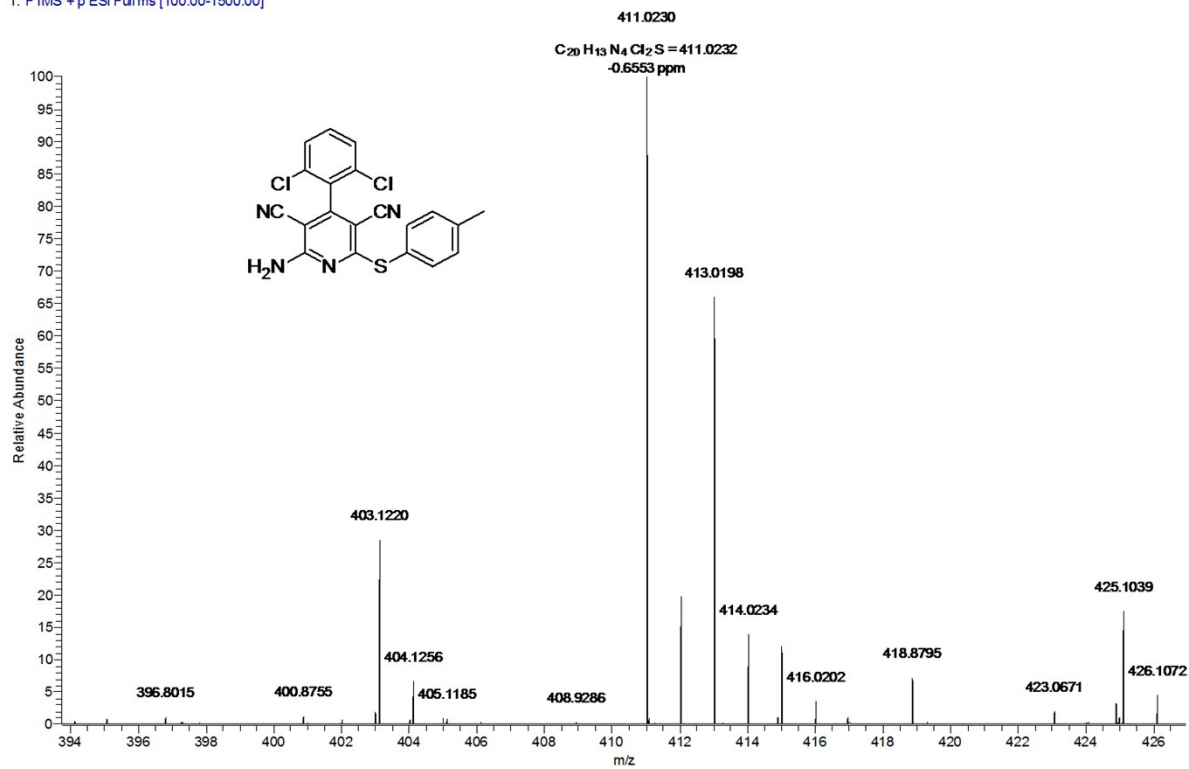

Spectrum 6. HRMS of compound 5c

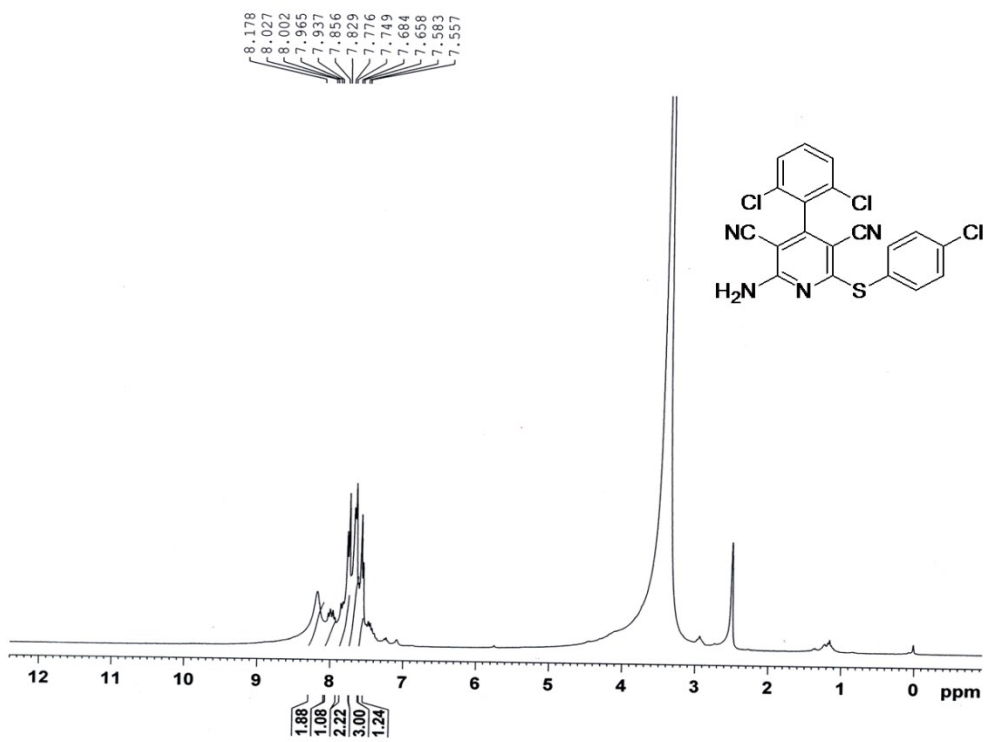

Spectrum 7. <sup>1</sup>H – NMR of compound 5c

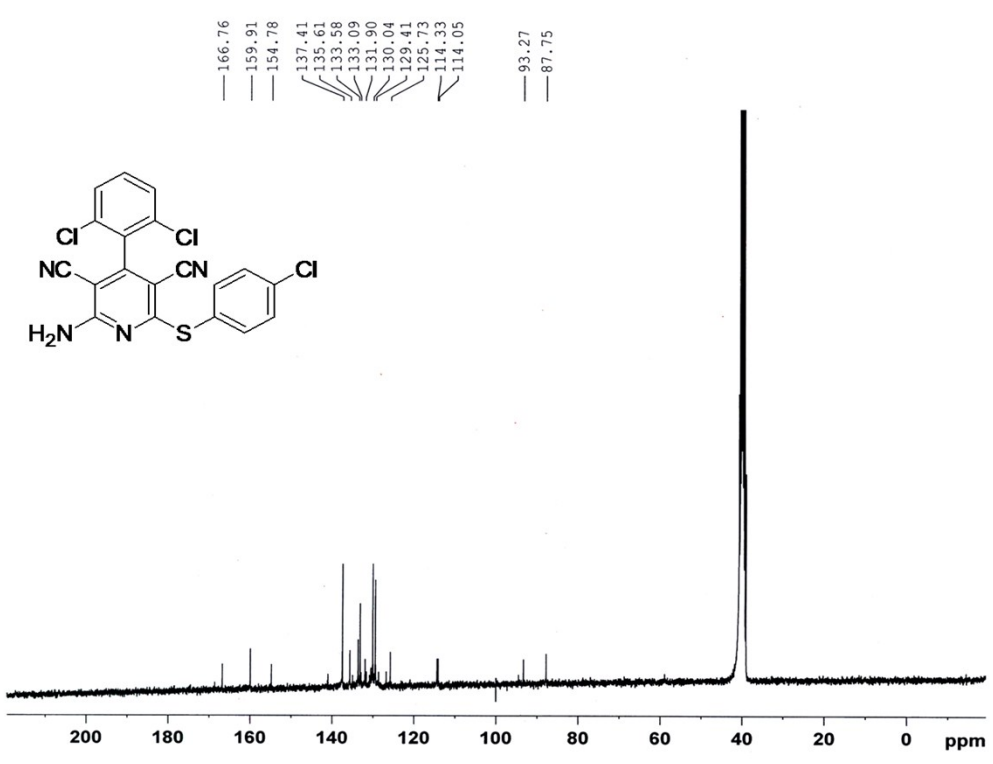

Spectrum 8. <sup>13</sup>C – NMR of compound 5c

DM-26 #127 RT: 0.57 AV: 1 NL: 8.64E6  
T: FTMS + p ESI Full ms [100.00-1500.00]

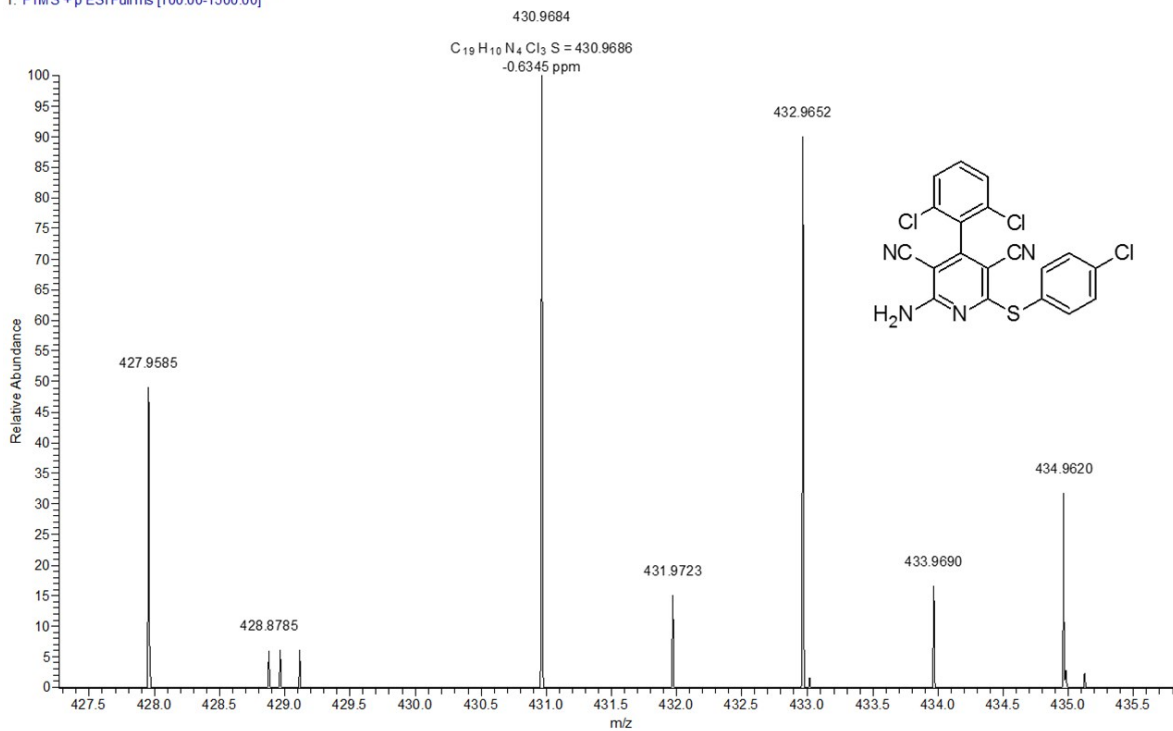

Spectrum 9. HRMS of compound 5c

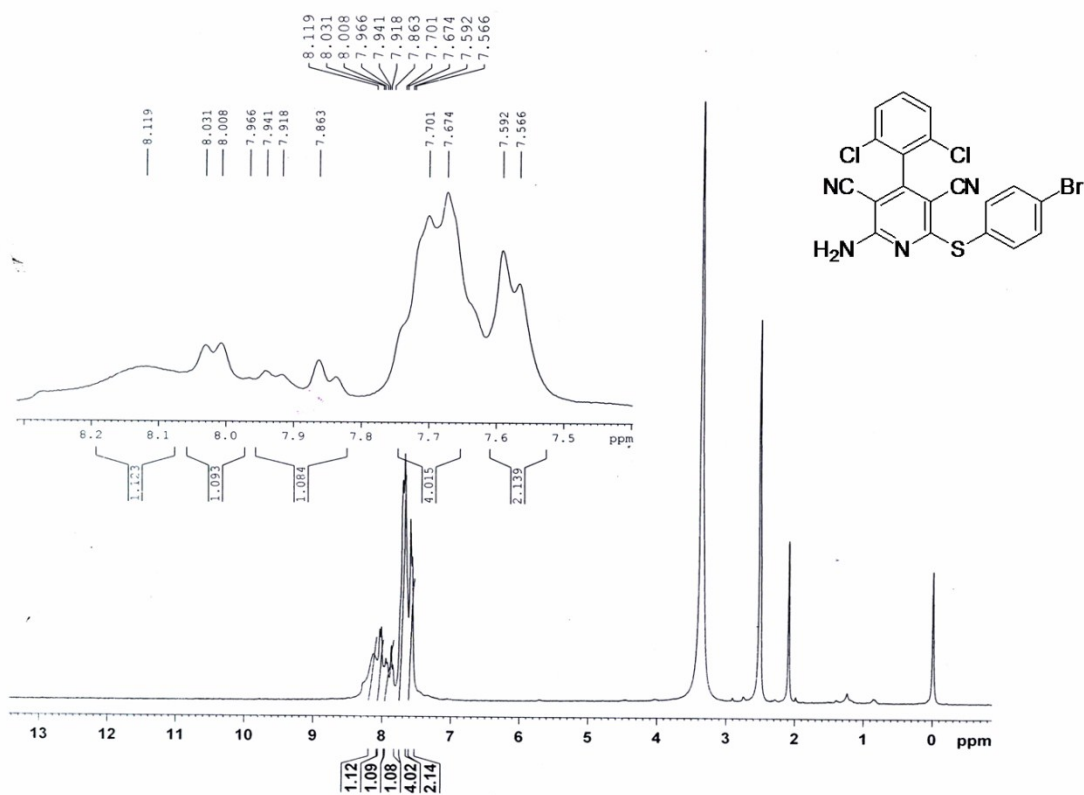

Spectrum 10. <sup>1</sup>H – NMR of compound 5d

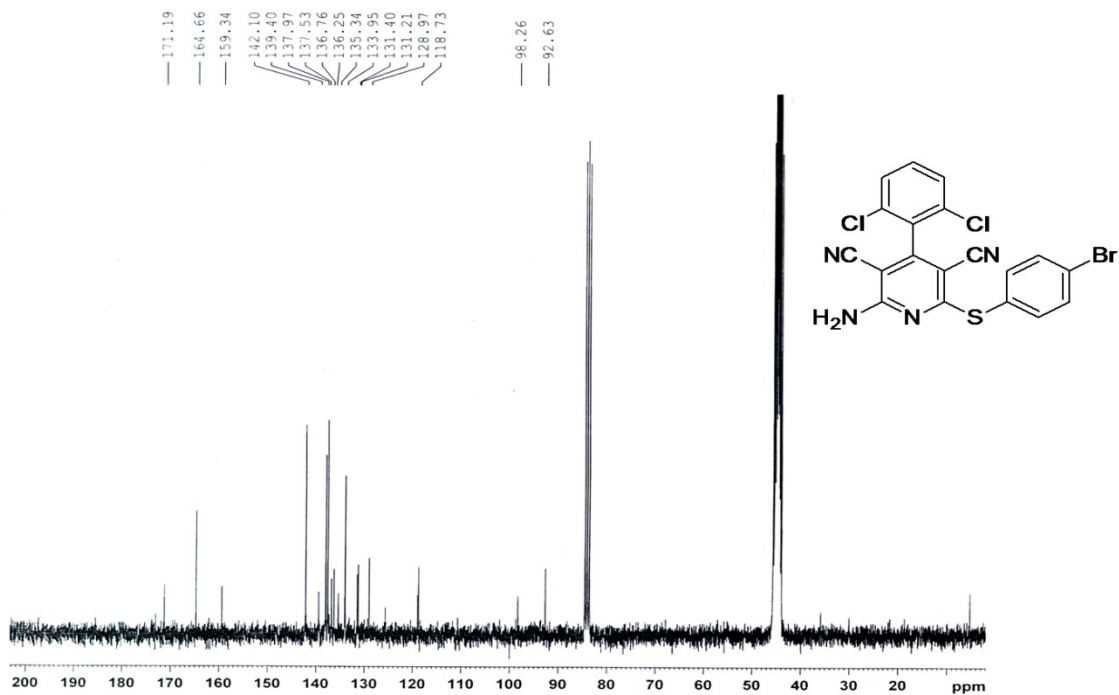

Spectrum 11.  $^{13}\text{C}$  – NMR of compound 5d

RK-4\_161121122404#396 RT: 1.76 AV: 1 NL: 4.09E5  
T: FTMS + p ESI Full ms [100.00-1500.00]

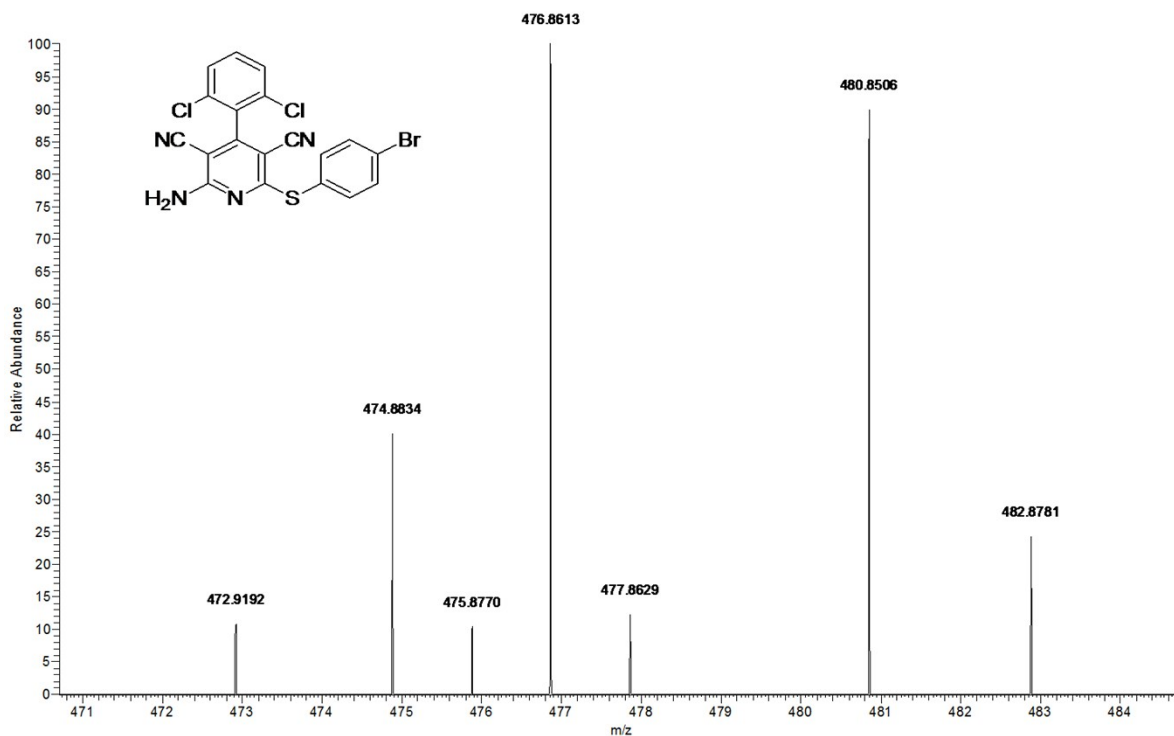

Spectrum 12. HRMS of compound 5d

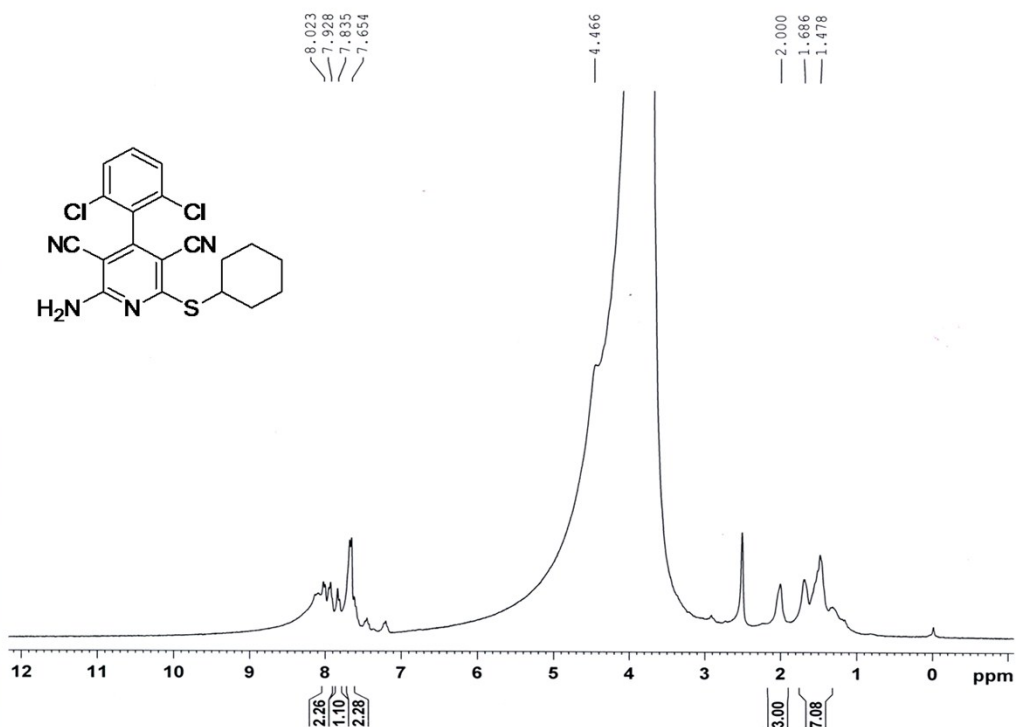

Spectrum 13. <sup>1</sup>H – NMR of compound 5e

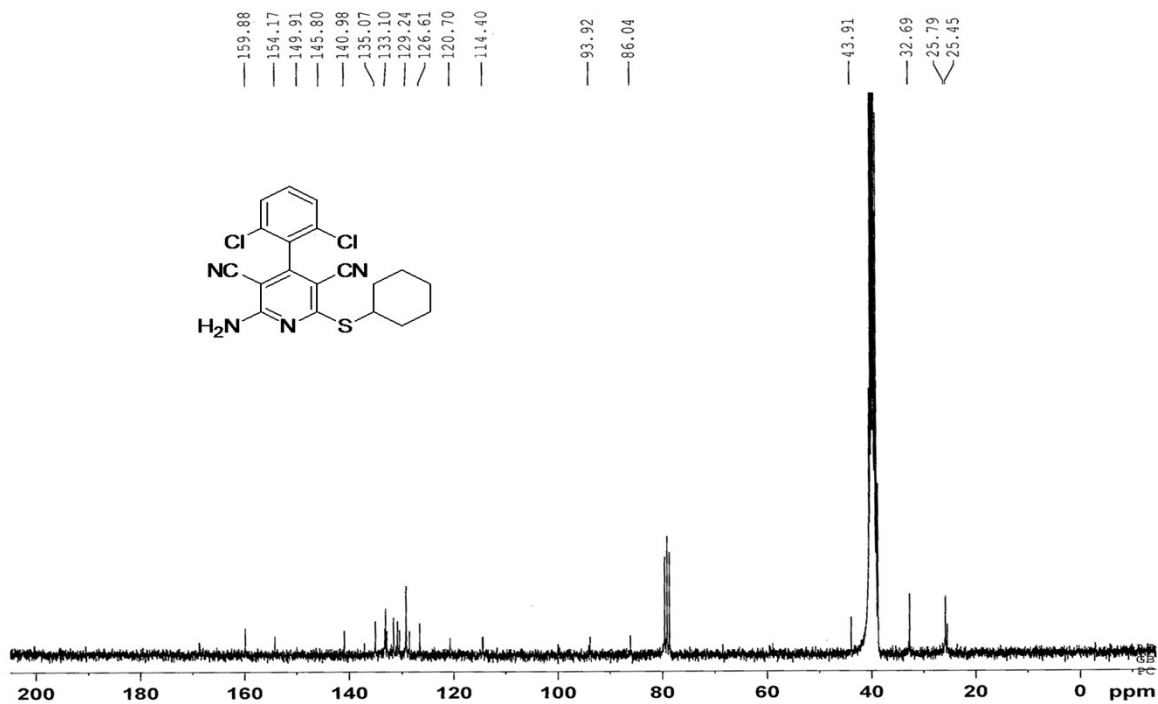

Spectrum 14. <sup>13</sup>C – NMR of compound 5e



RK-10#128 RT: 0.57 AV: 1 NL: 5.51E7  
T: FTMS + p ESI Full ms [100.00-1500.00]

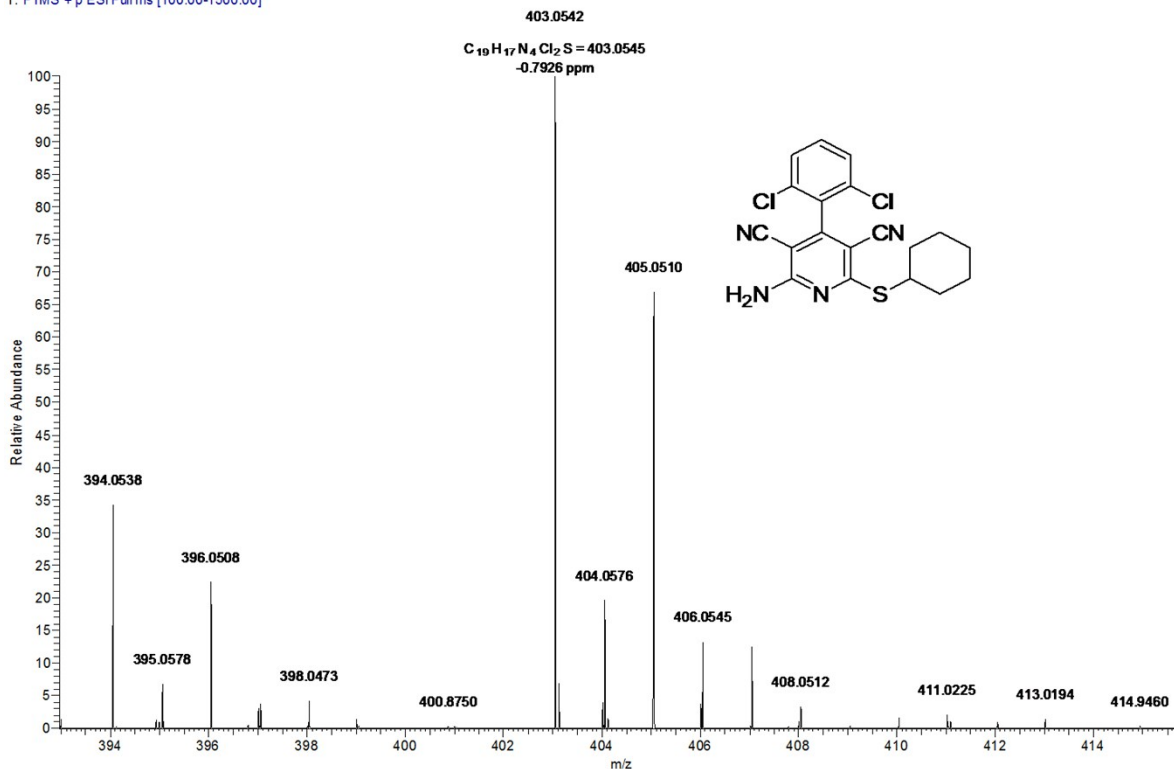

Spectrum 15. HRMS of compound 5e

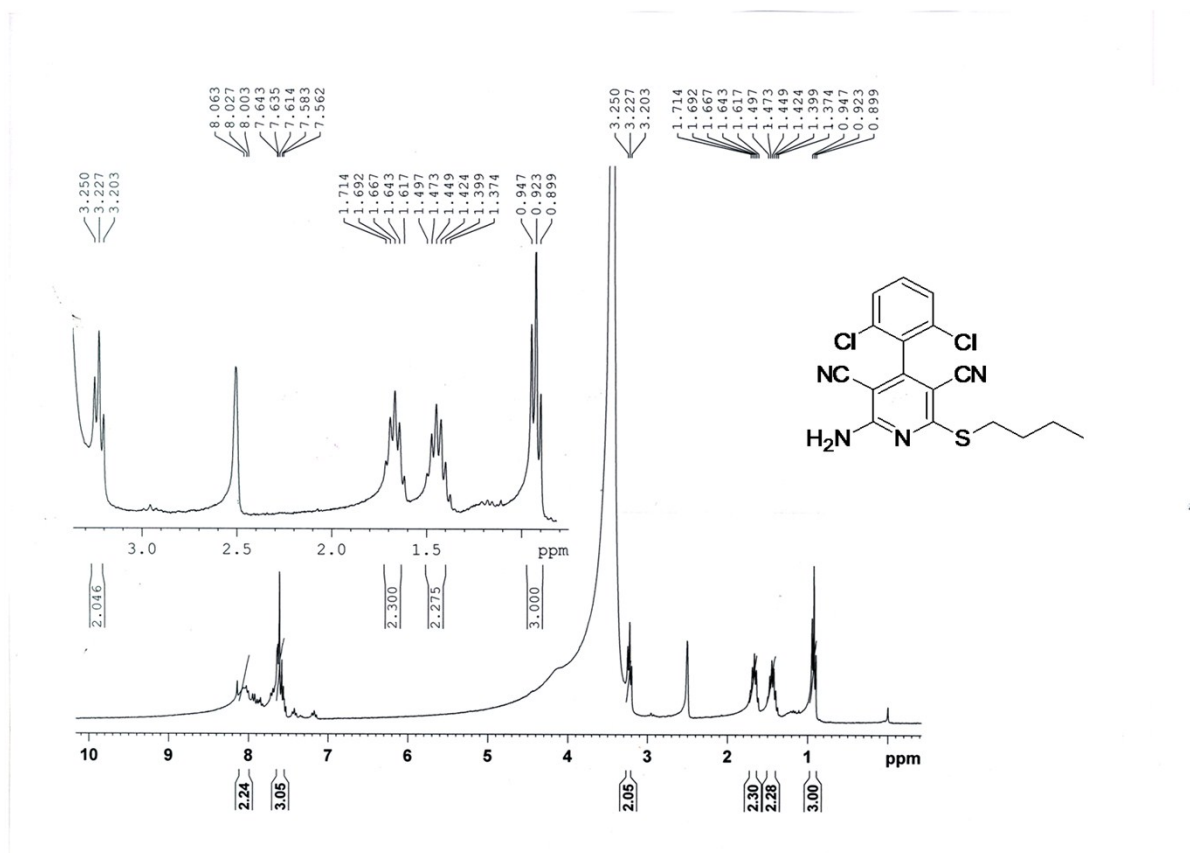

Spectrum 16.  $^1H$  - NMR of compound 5f

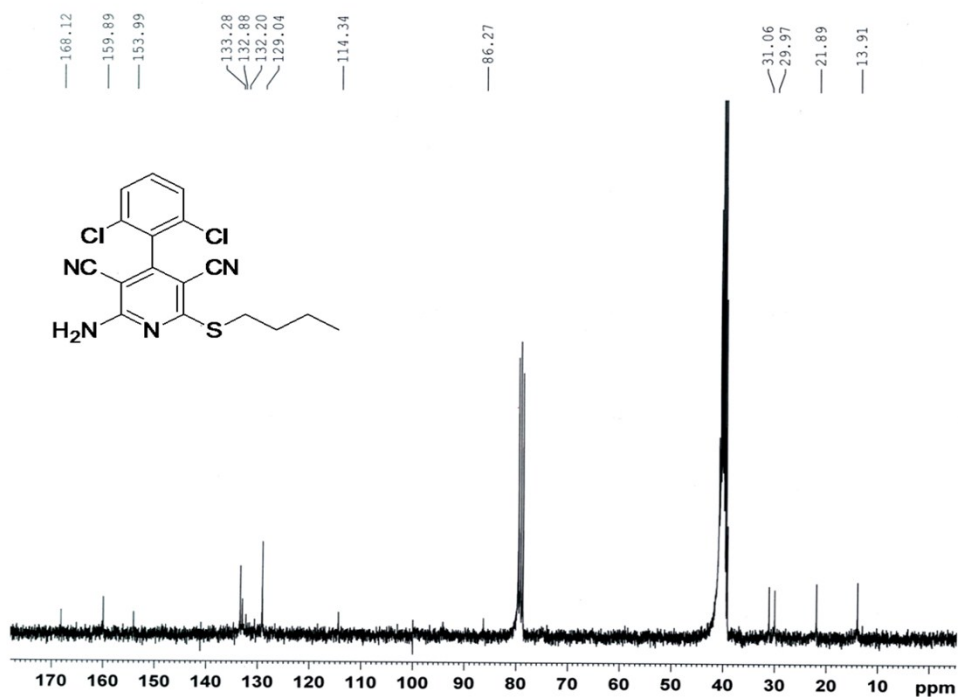

Spectrum 17. <sup>13</sup>C – NMR of compound 5f

RK-11#136 RT: 0.60 AV: 1 NL: 2.21E7  
T: FTMS + p ESI Full ms [100.00-1500.00]

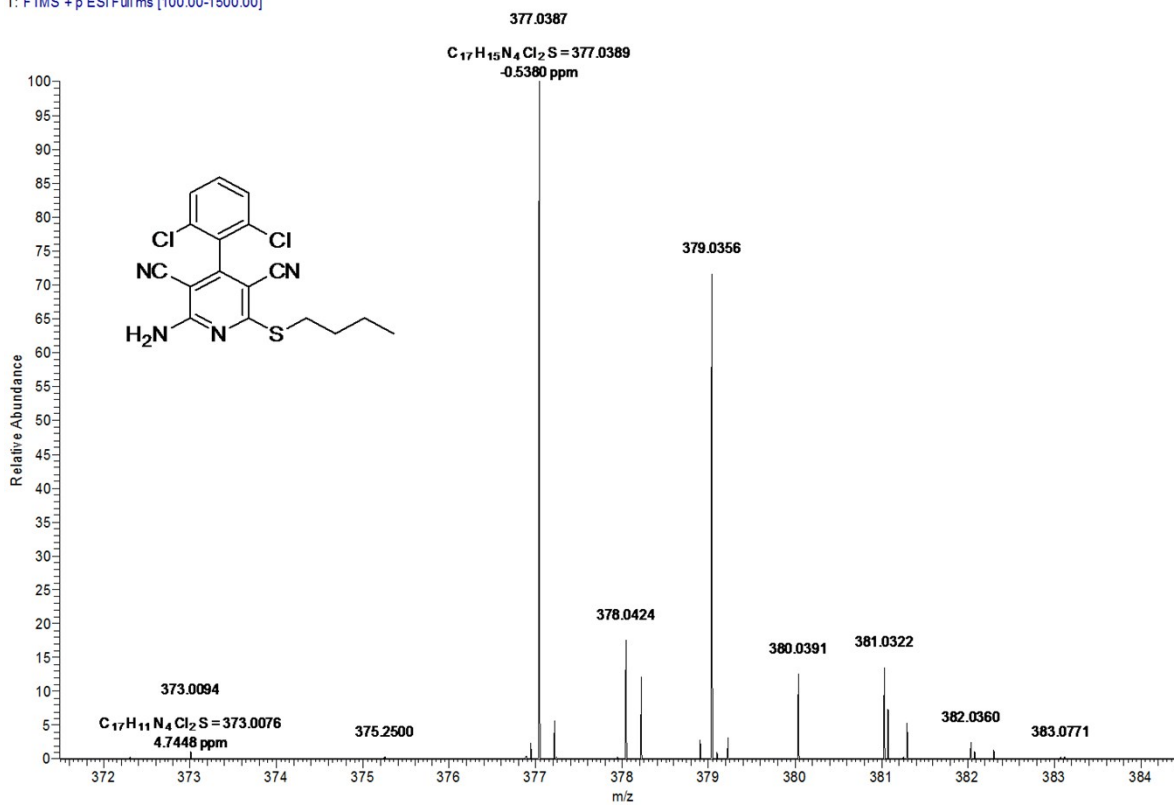

Spectrum 18. HRMS of compound 5f

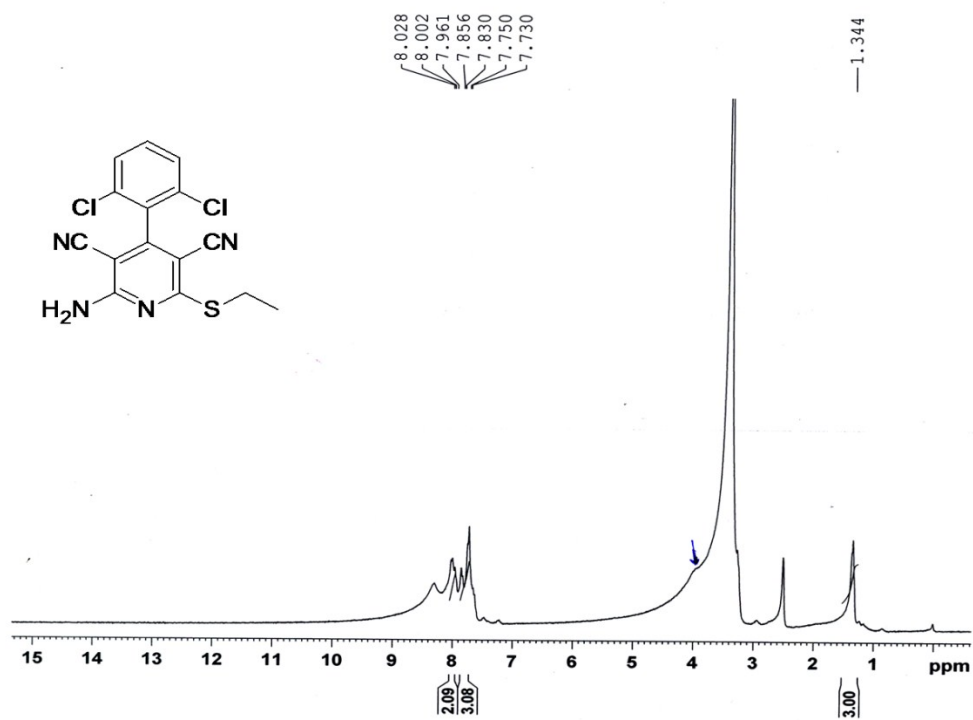

Spectrum 19.  $^1\text{H-NMR}$  of compound 5g

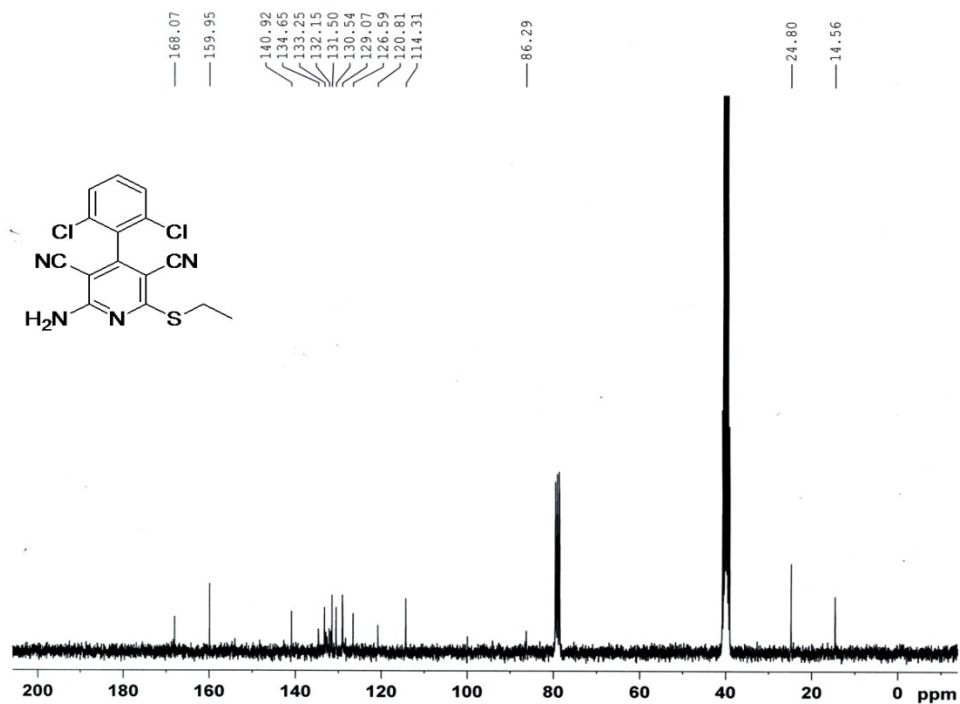

Spectrum 20.  $^{13}\text{C-NMR}$  of compound 5g

RK-12#287 RT: 1.28 AV: 1 NL: 1.93E6  
T: FTMS + p ESI Full ms [100.00-1500.00]

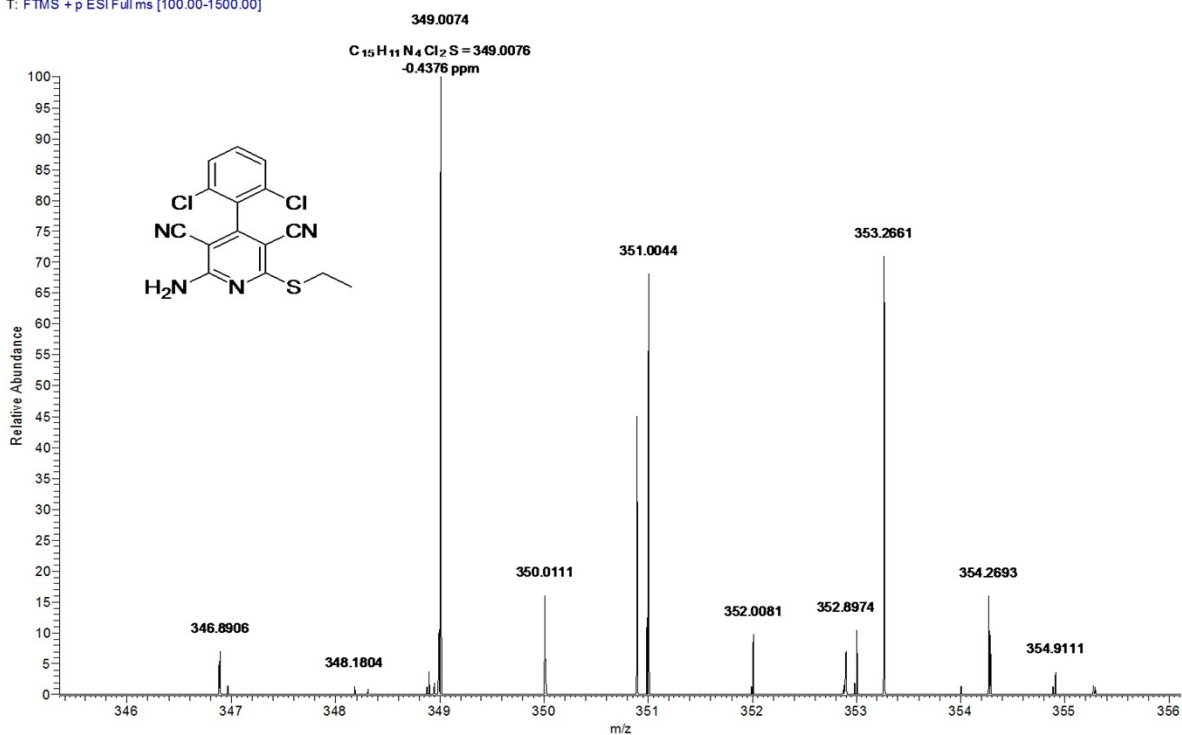

Spectrum 21. HRMS of compound 5g

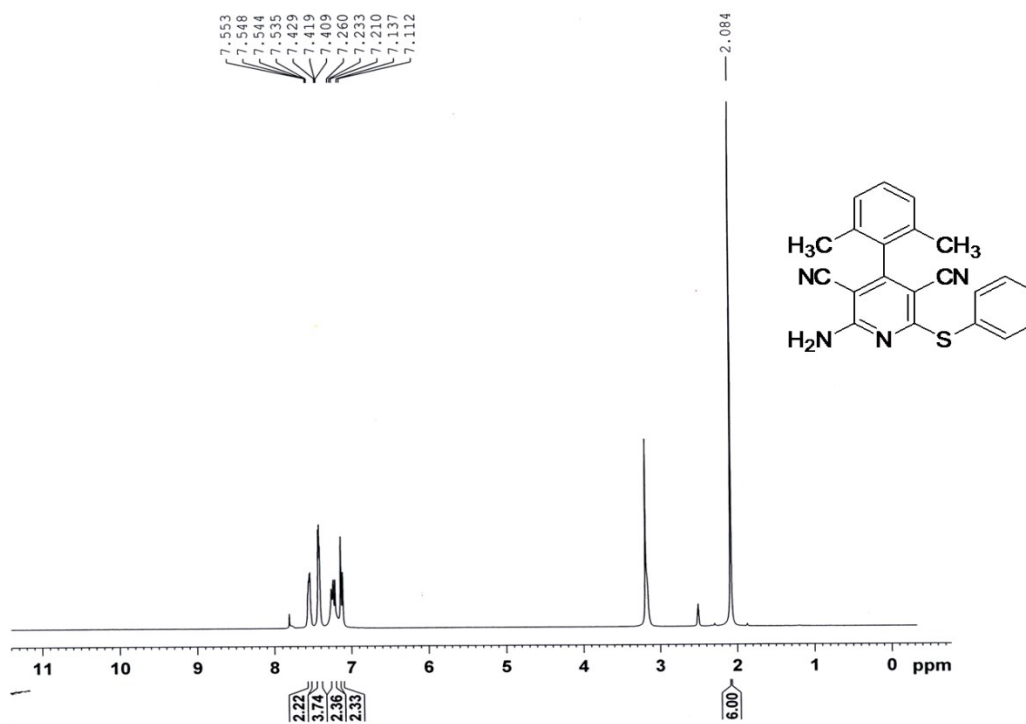

Spectrum 22.  $^1H$  – NMR of compound 5h

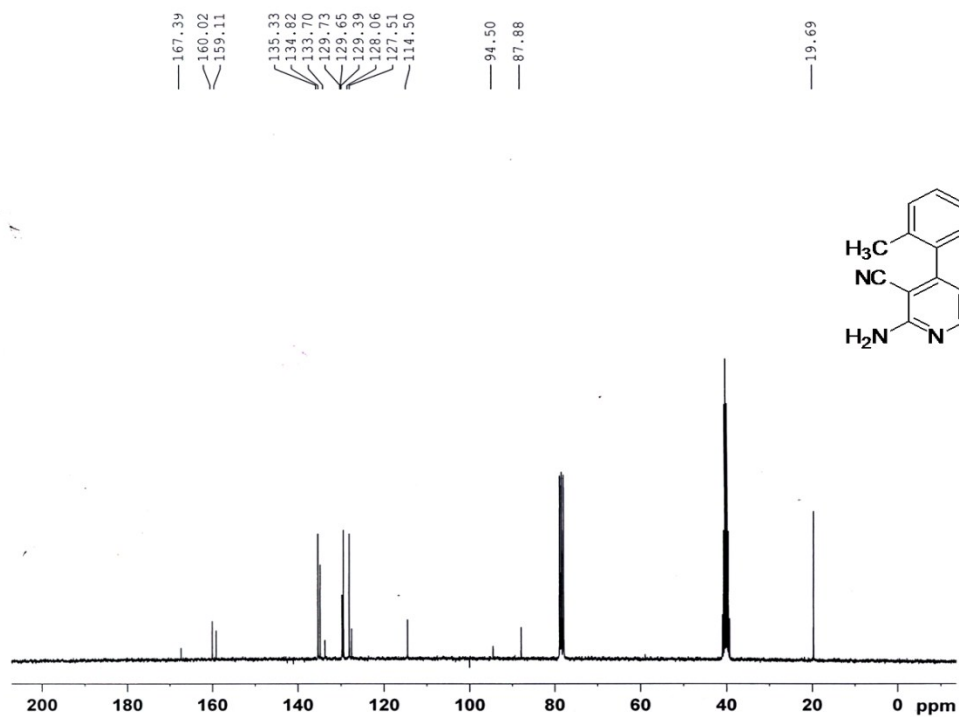

Spectrum 23.  $^{13}\text{C}$  – NMR of compound 5h

RK-3\_161121122057#107 RT: 0.48 AV: 1 NL: 6.15E8  
T: FTMS +p ESI Full ms [100.00-1500.00]

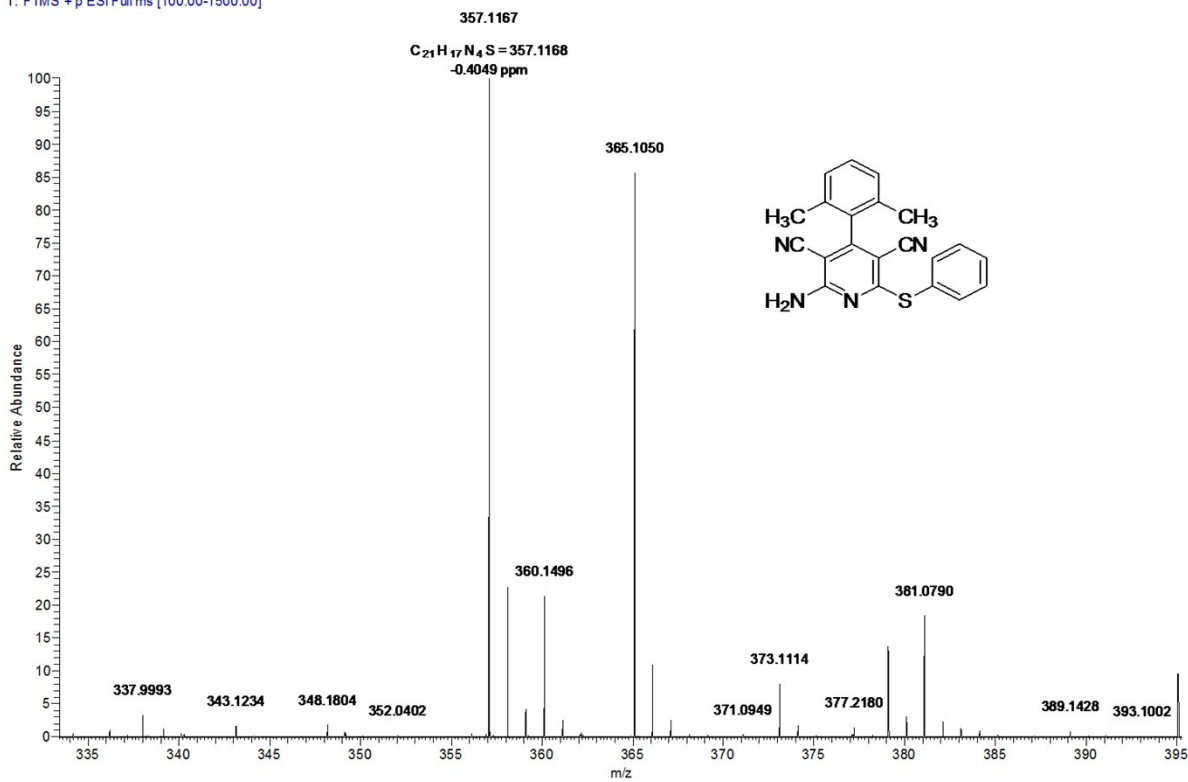

Spectrum 24. HRMS of compound 5h

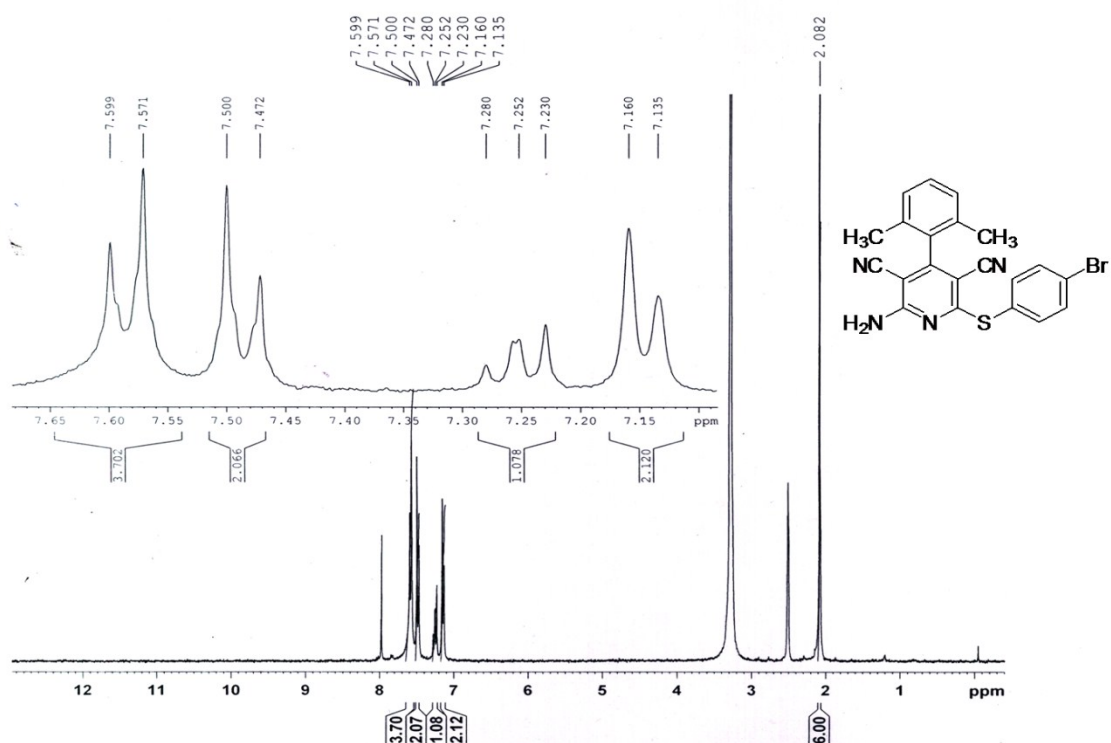

**Spectrum 25. <sup>1</sup>H – NMR of compound 5i**

RK-1\_161121121436#110 RT: 0.49 AV: 1 NL: 2.56E7  
T: FTMS + p ESI Full ms [100.00-1500.00]

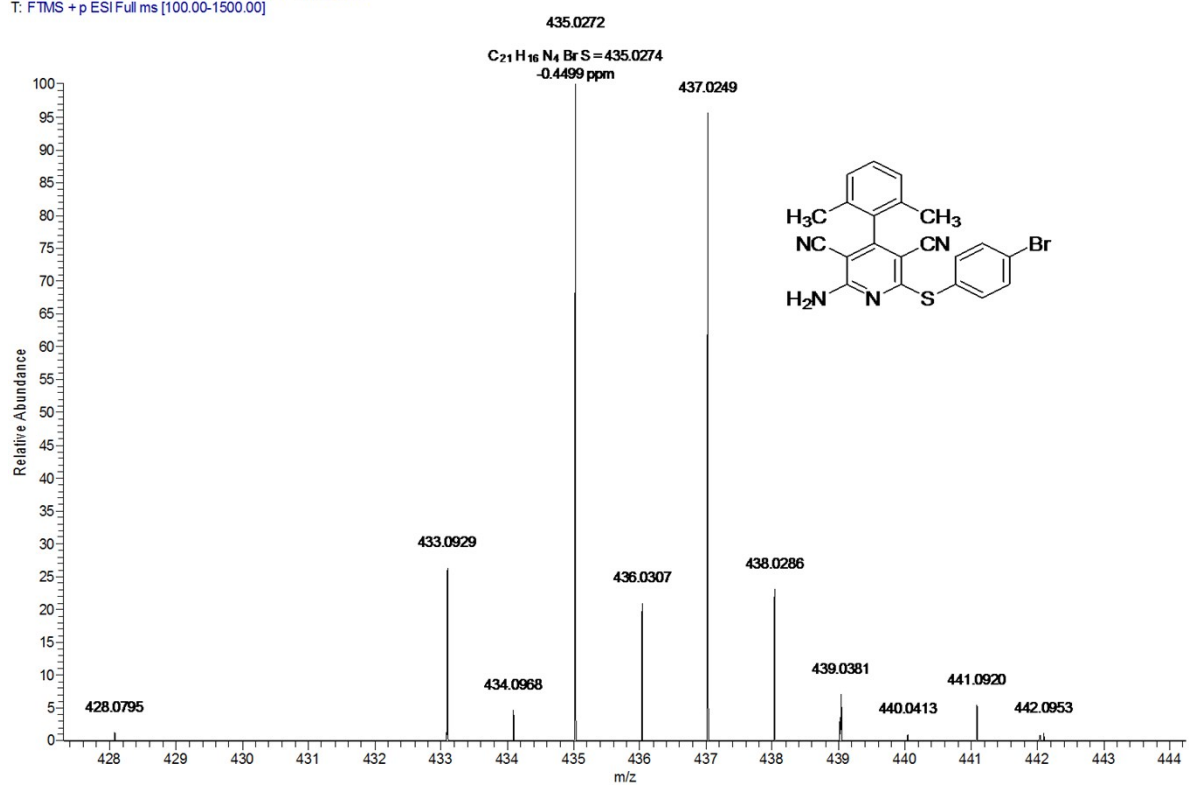

**Spectrum 26. HRMS of compound 5i**

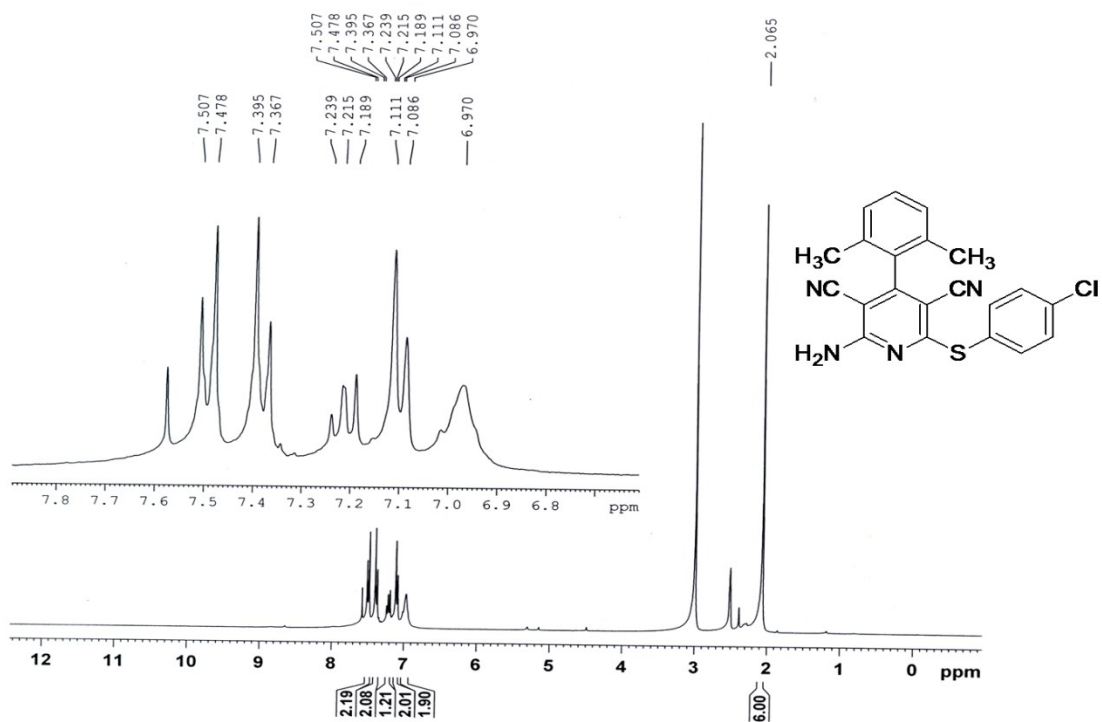

Spectrum 27. <sup>1</sup>H – NMR of compound 5j

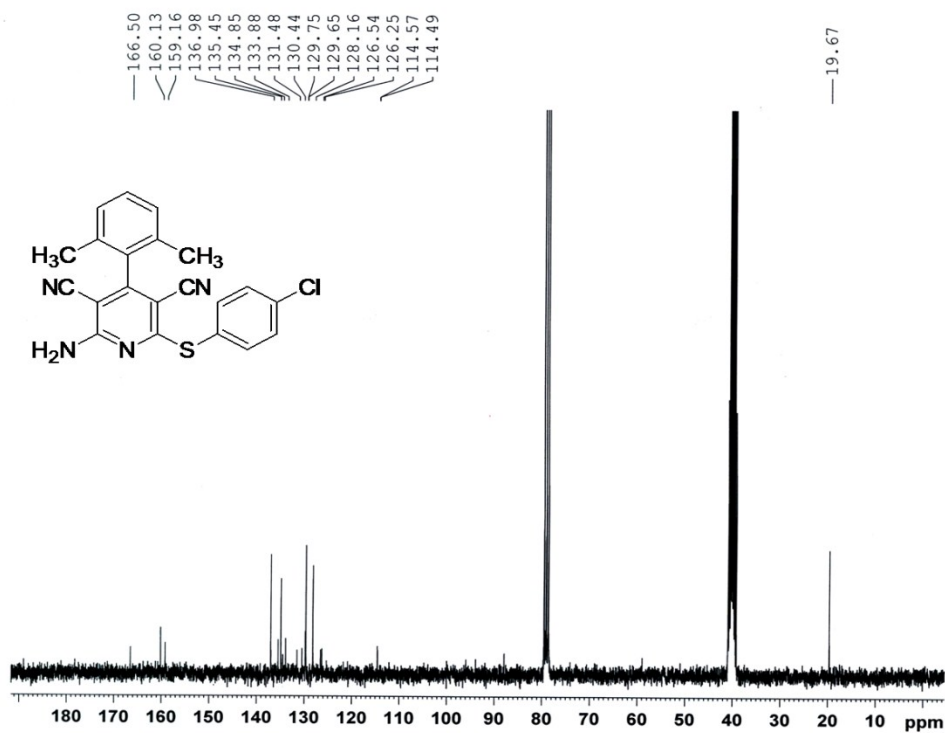

Spectrum 28. <sup>13</sup>C – NMR of compound 5j

RK-2\_161121121744 #139 RT: 0.62 AV: 1 NL: 1.96E7  
T: FTMS + p ESI Full ms [100.00-1500.00]

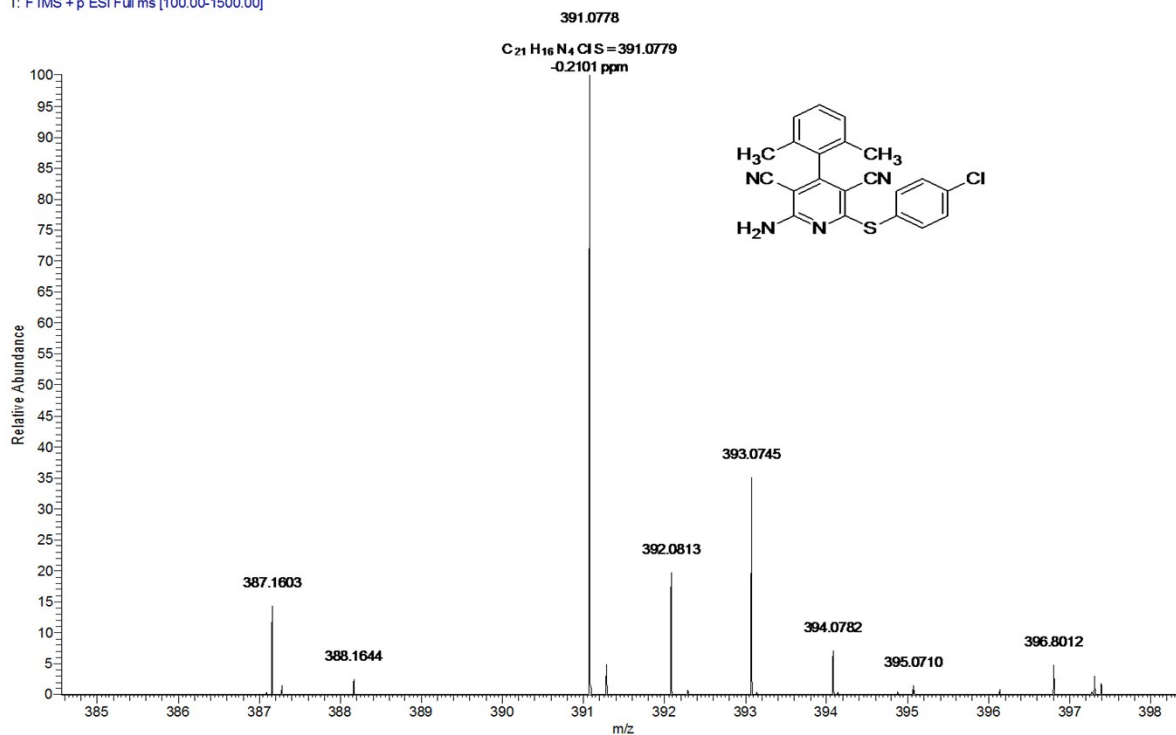

**Spectrum 29. HRMS of compound 5j**

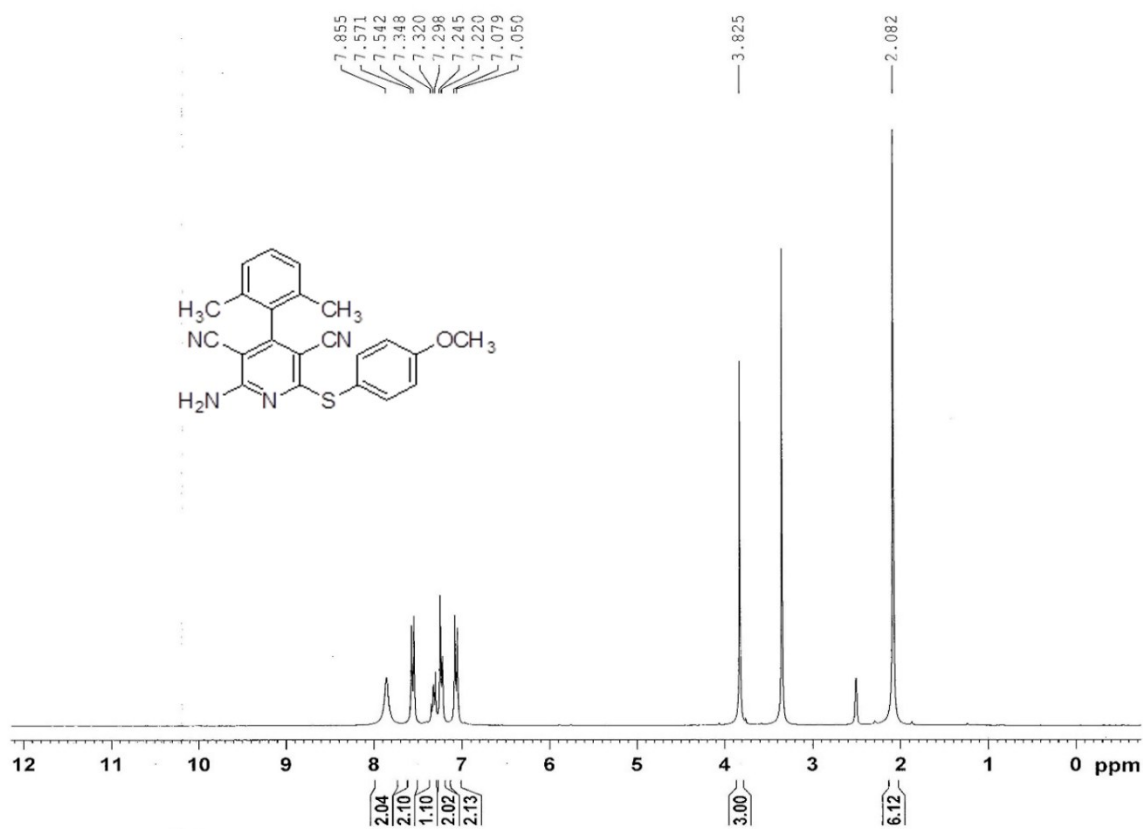

**Spectrum 30. <sup>1</sup>H – NMR of compound 5k**



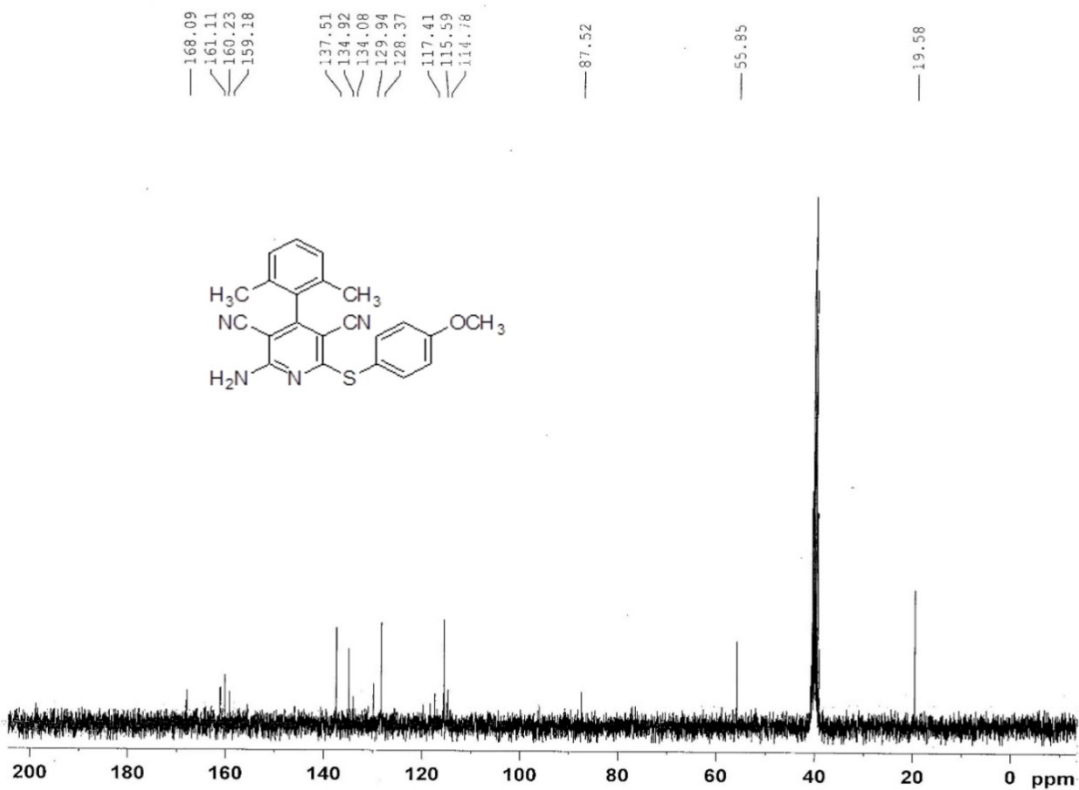

Spectrum 31.  $^{13}\text{C}$  – NMR of compound 5k

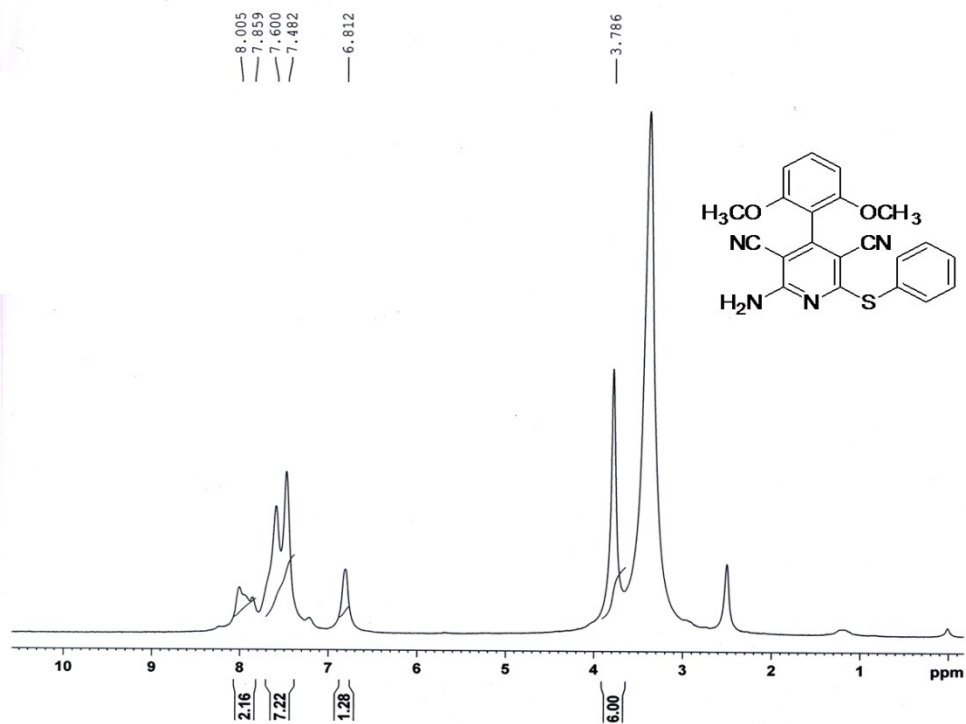

Spectrum 32.  $^1\text{H}$  – NMR of compound 5l

RK-5\_161121122715 #102 RT: 0.45 AV: 1 NL: 5.61E8  
T: FTMS + p ESI Full ms [100.00-1500.00]

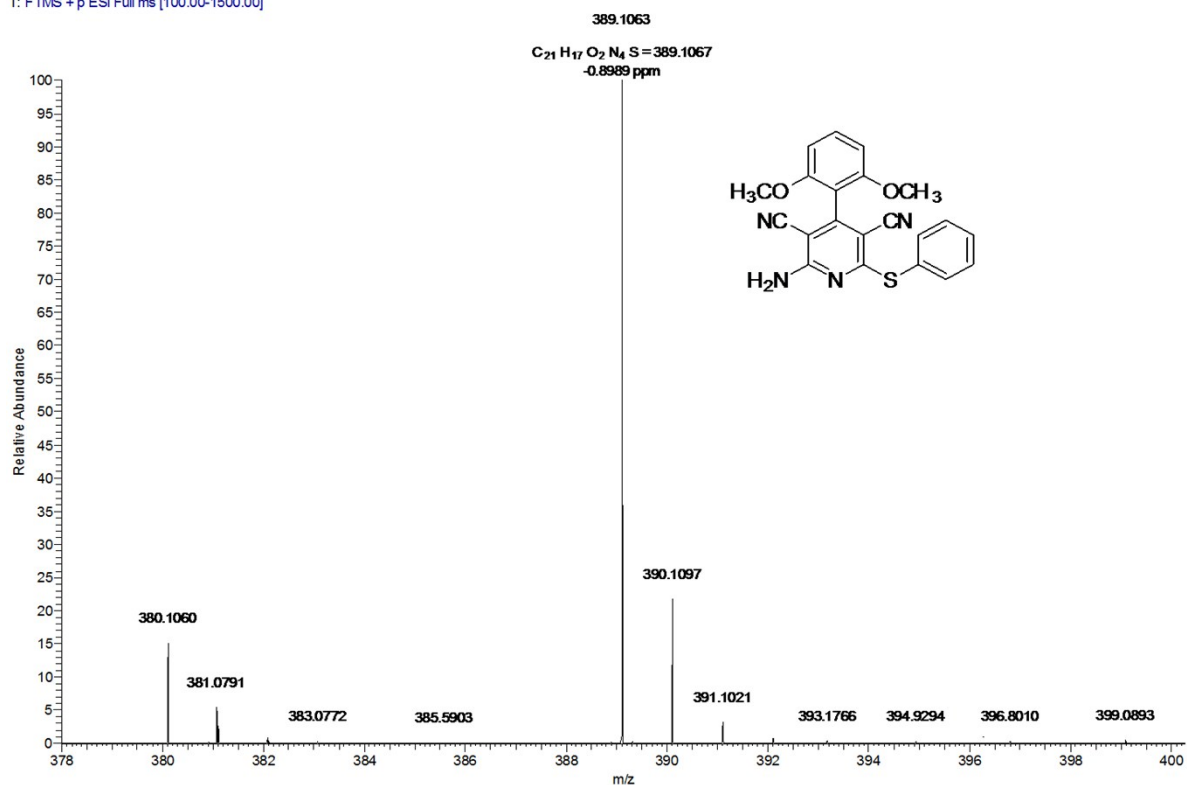

Spectrum 33. HRMS of compound 5l

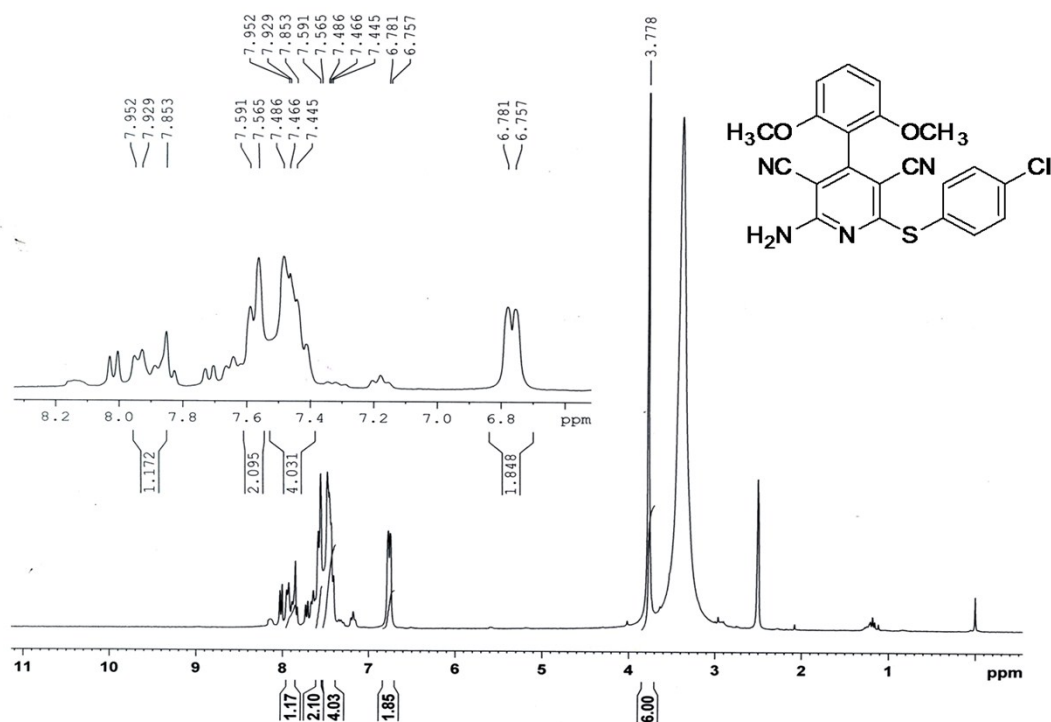

Spectrum 34. <sup>1</sup>H – NMR of compound 5m

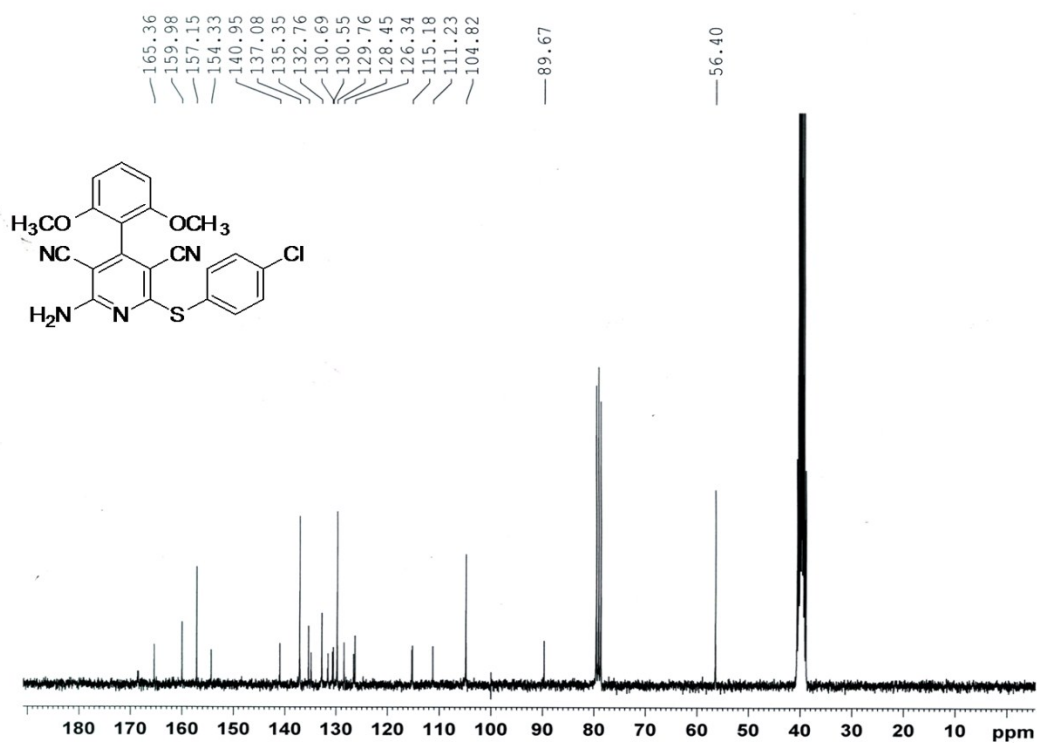

Spectrum 35. <sup>13</sup>C – NMR of compound 5m

RK-6\_161121123023#119 RT: 0.53 AV: 1 NL: 3.14E8  
T: FTMS + p ESI Full ms [100.00-1500.00]

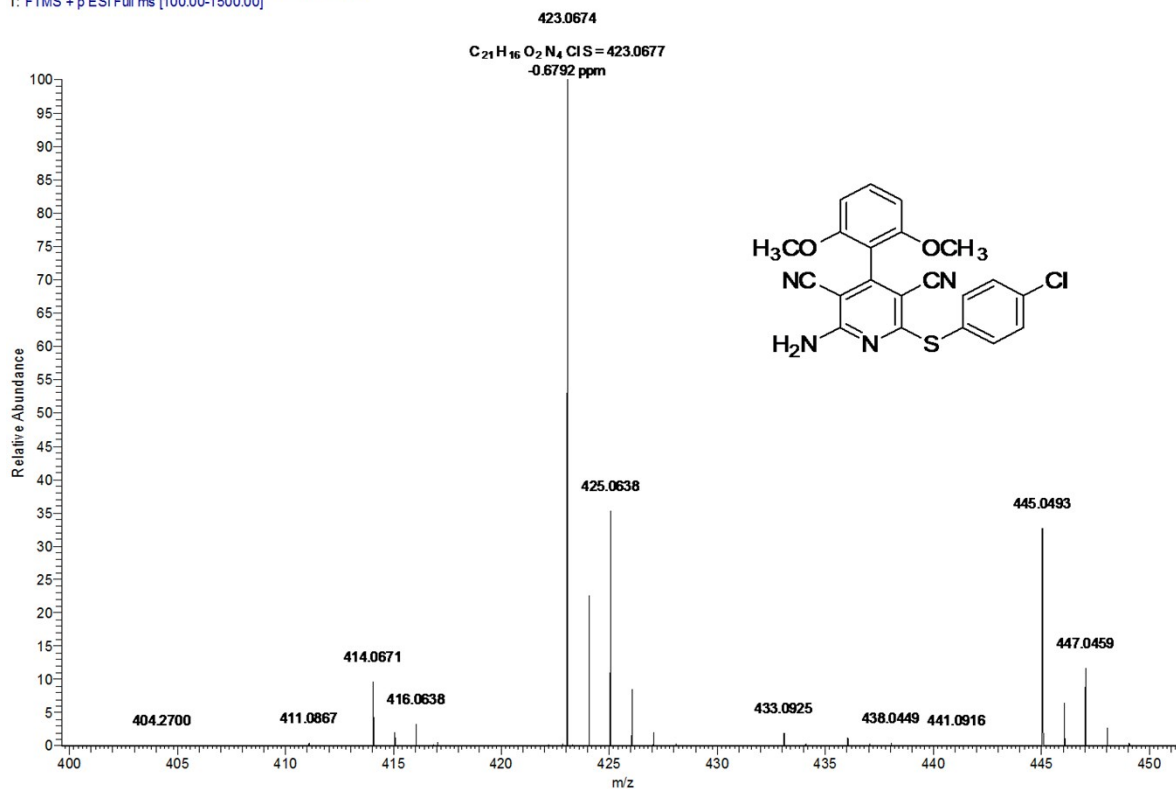

Spectrum 36. HRMS of compound 5m

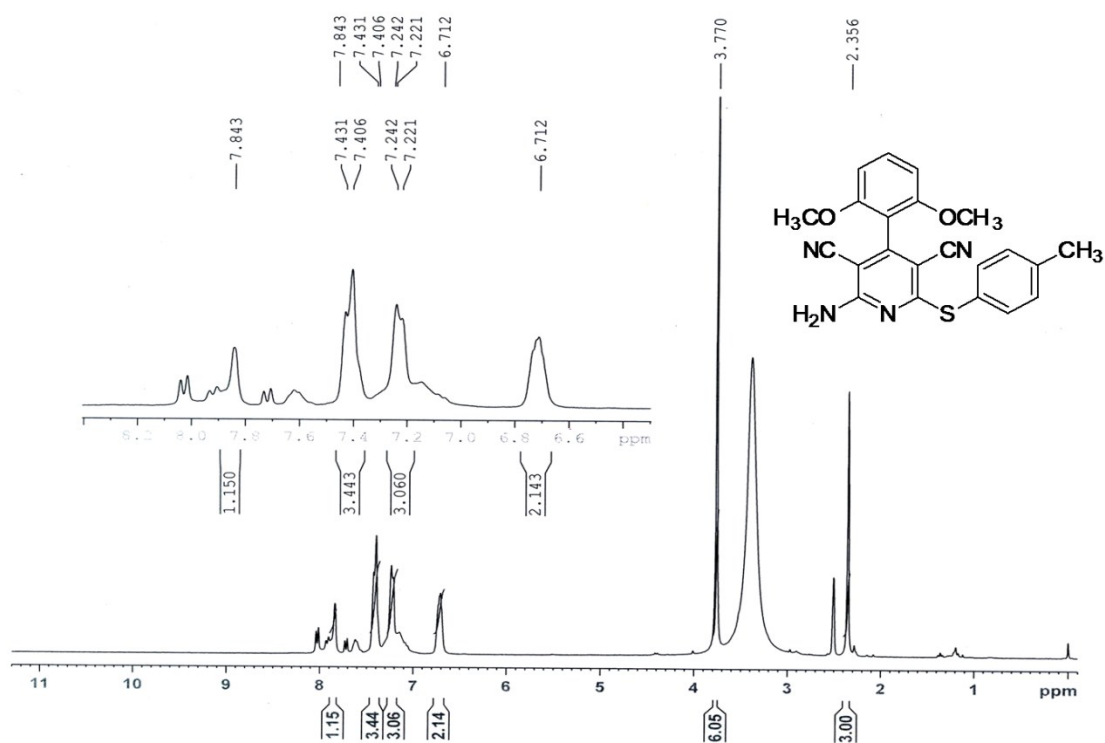

**Spectrum 37. <sup>1</sup>H – NMR of compound 5n**

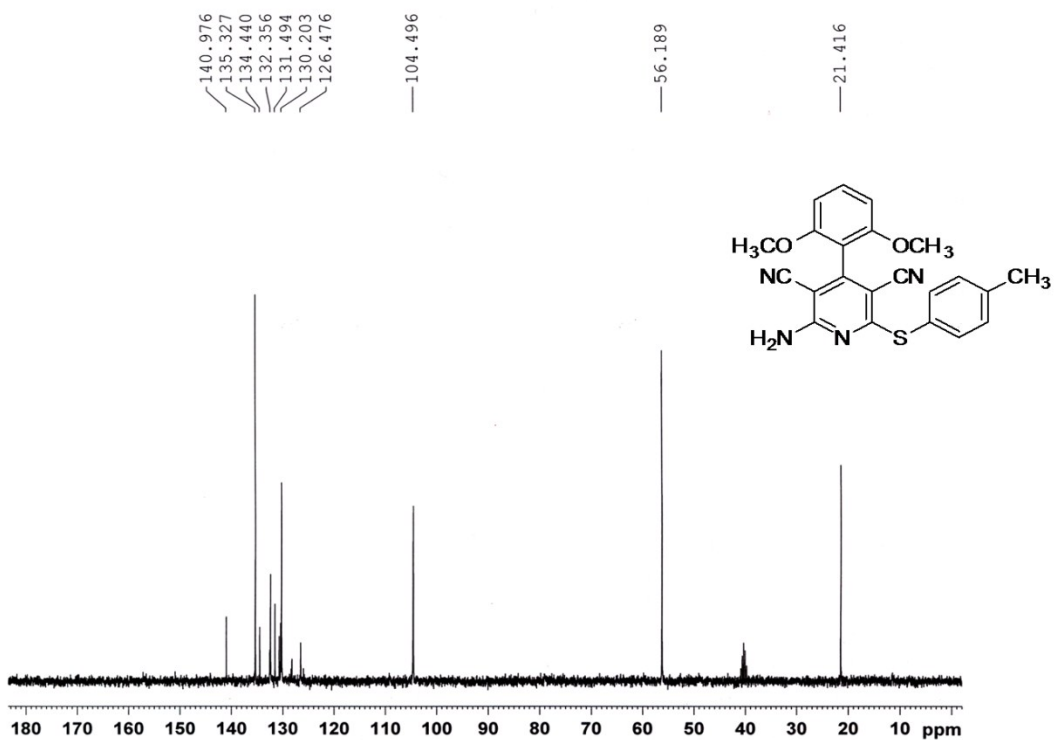

**Spectrum 38. <sup>13</sup>C – NMR of compound 5n**

RK-7\_161121123335#102 RT: 0.45 AV: 1 NL: 4.40E8  
T: FTMS + p ESI Full ms [100.00-1500.00]

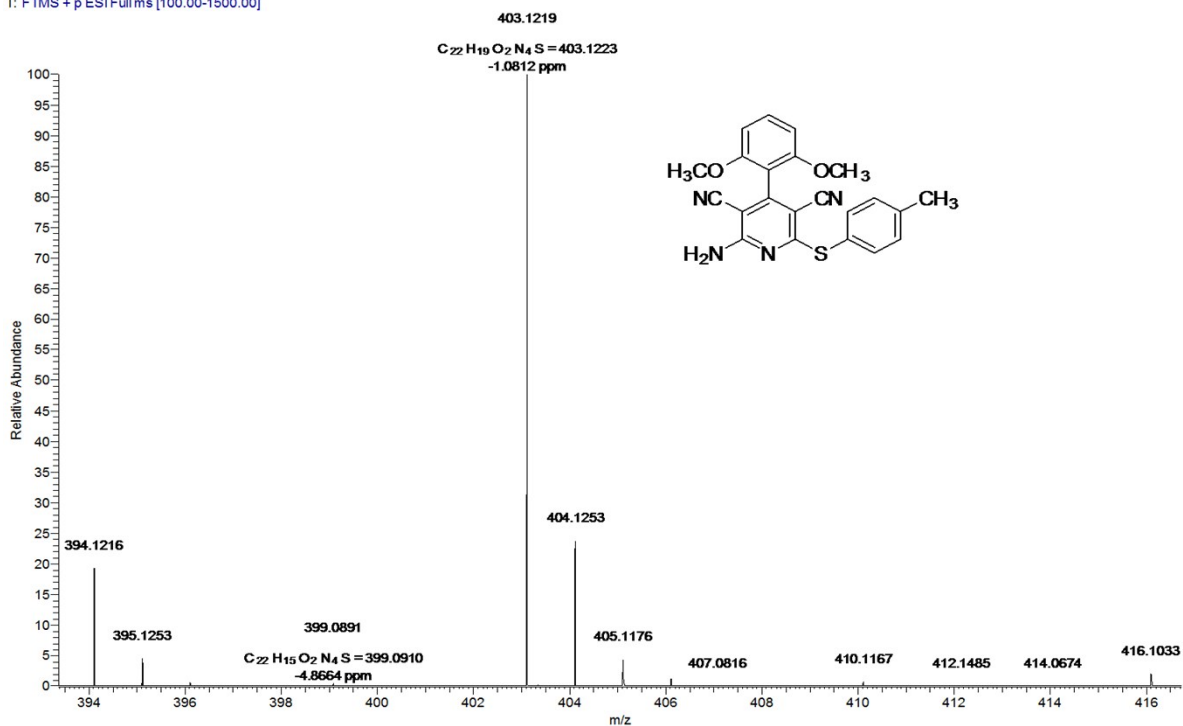

Spectrum 39. HRMS of compound 5n

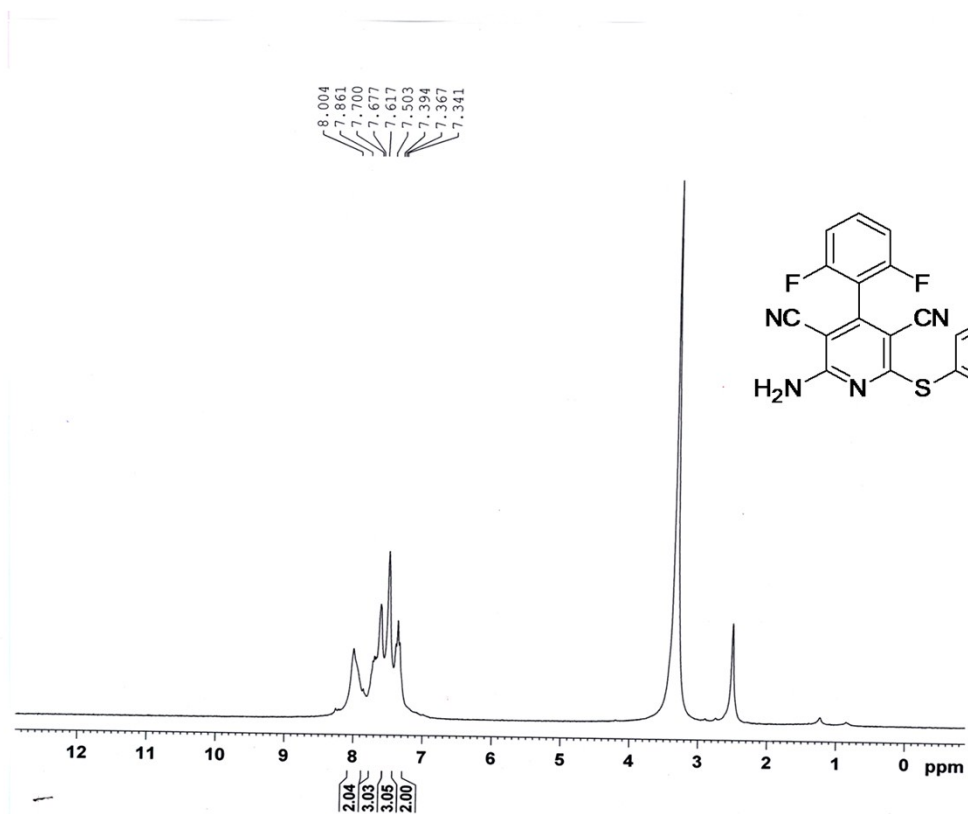

Spectrum 40. <sup>1</sup>H – NMR of compound 5o

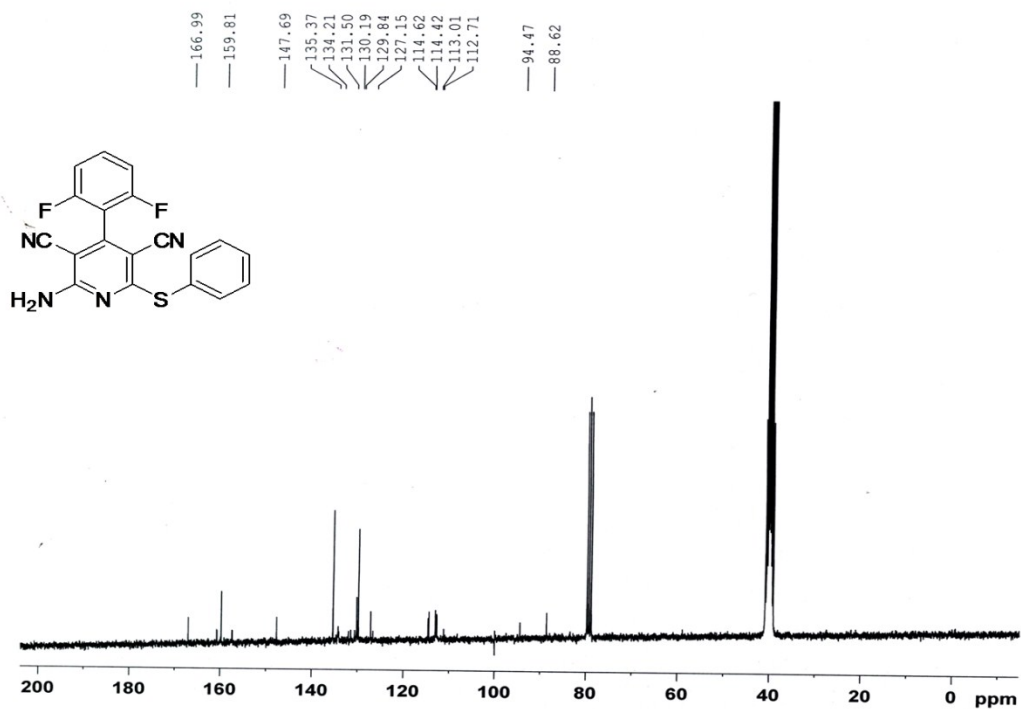

Spectrum 41.  $^{13}\text{C}$  – NMR of compound 5o

DM-27 #114 RT: 0.51 AV: 1 NL: 1.40E8  
T: FTMS + p ESI Full ms [100.00-1500.00]

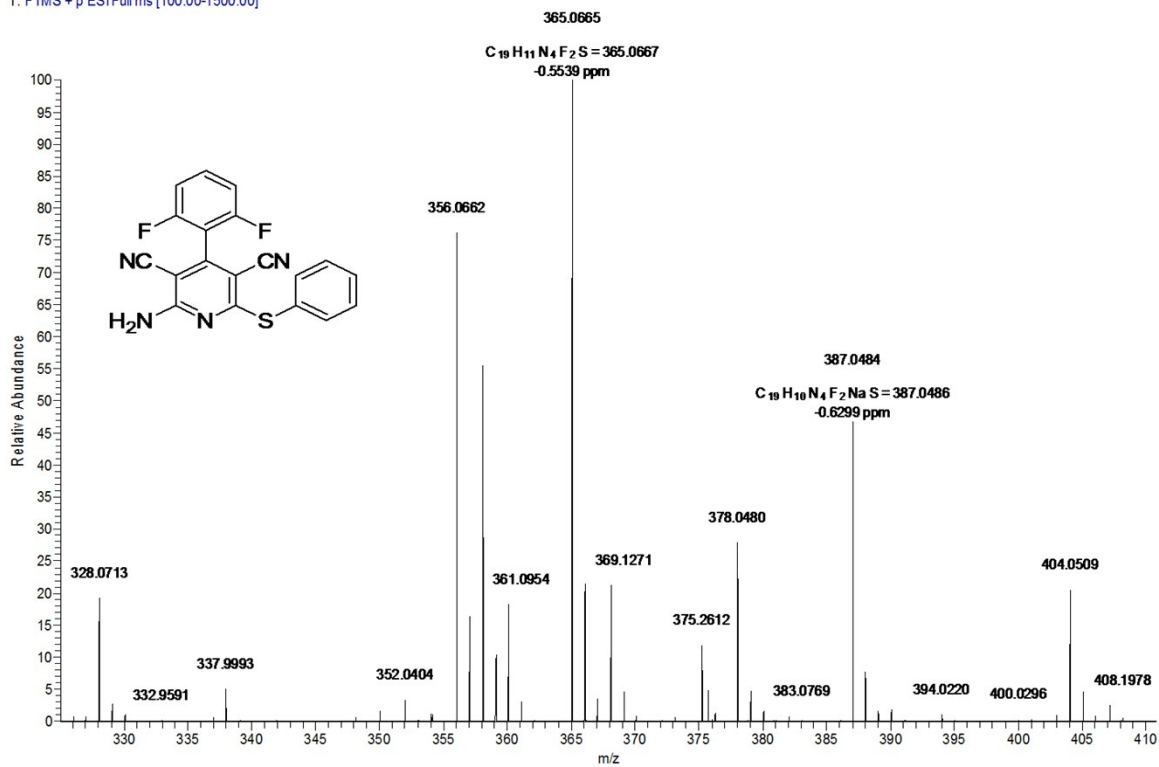

Spectrum 42. HRMS of compound 5o

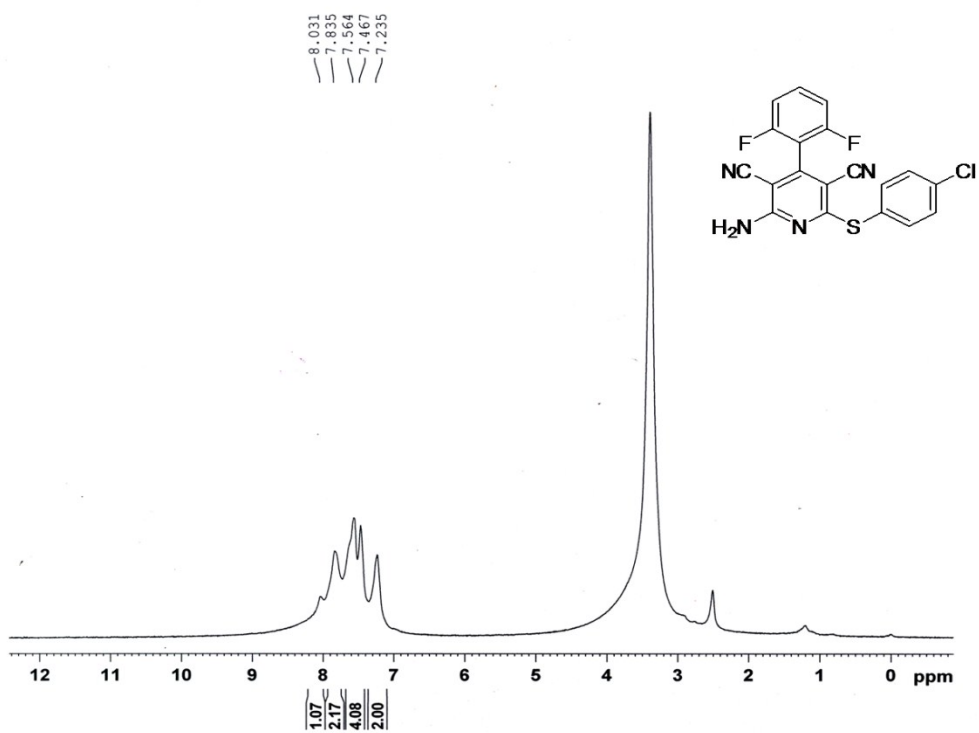

Spectrum 43. <sup>1</sup>H – NMR of compound 5p

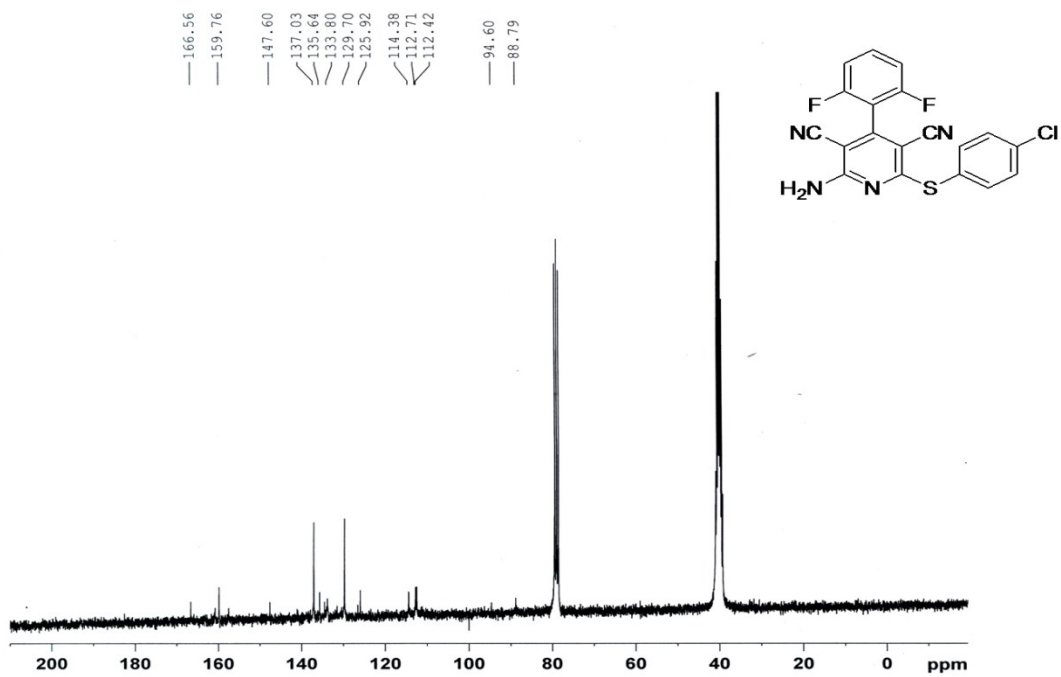

Spectrum 44. <sup>13</sup>C – NMR of compound 5p

DM-29 #122 RT: 0.54 AV: 1 NL: 2.31E7  
T: FTMS + p ESI Full ms [100.00-1500.00]

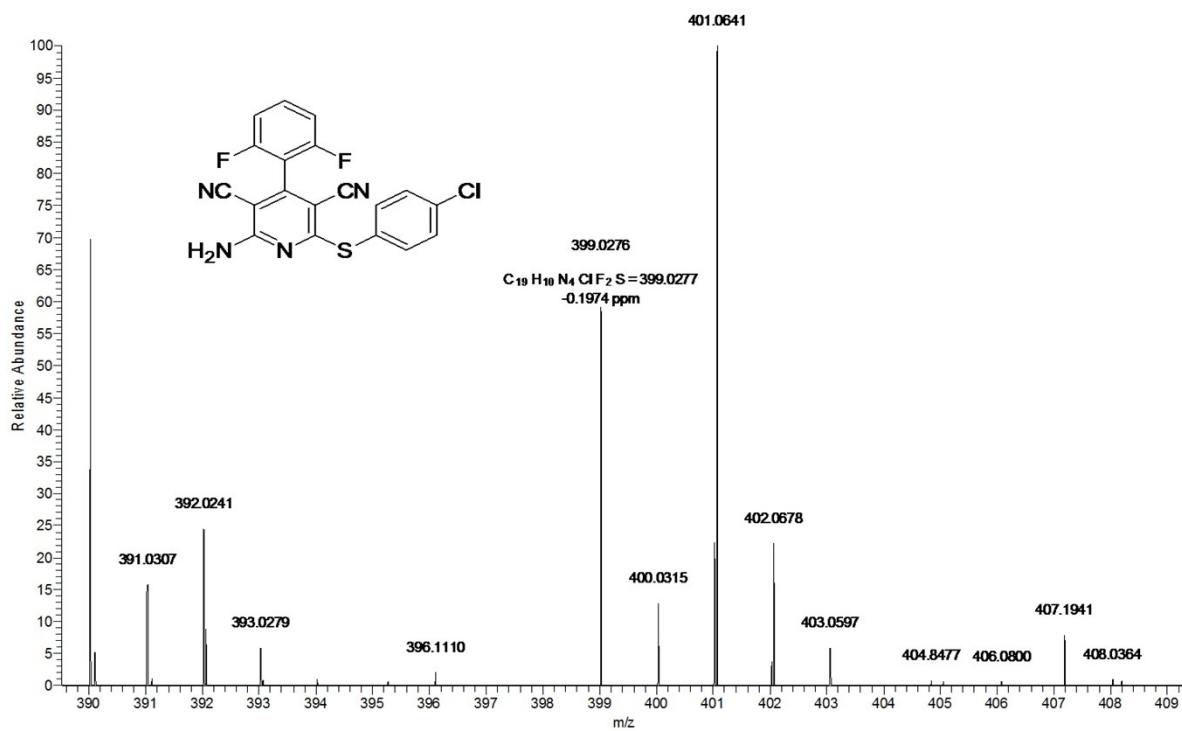

Spectrum 45. HRMS of compound 5p

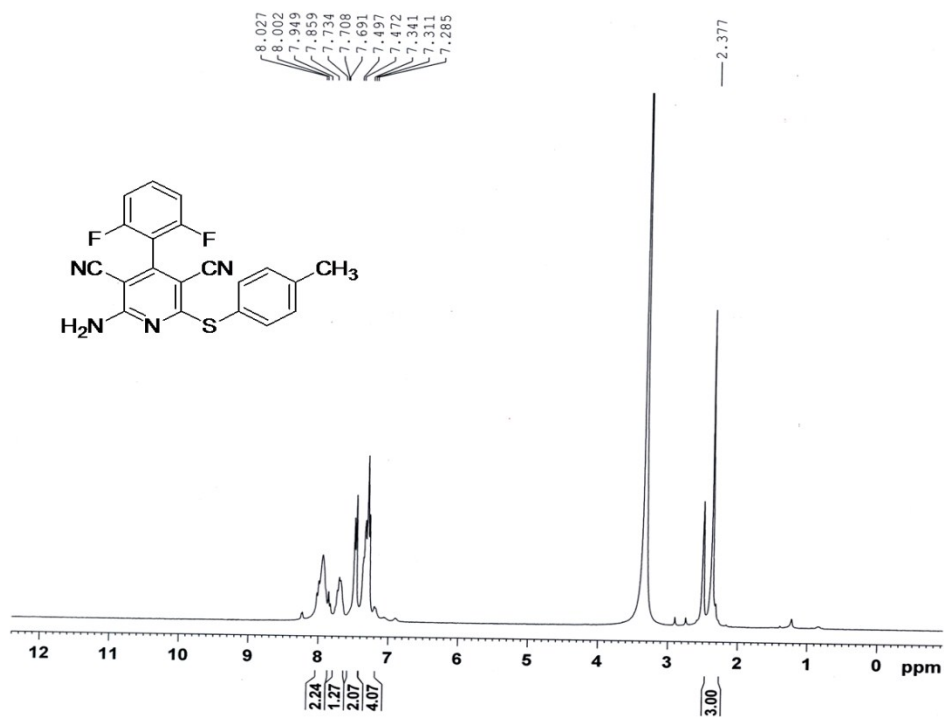

Spectrum 46. <sup>1</sup>H – NMR of compound 5q



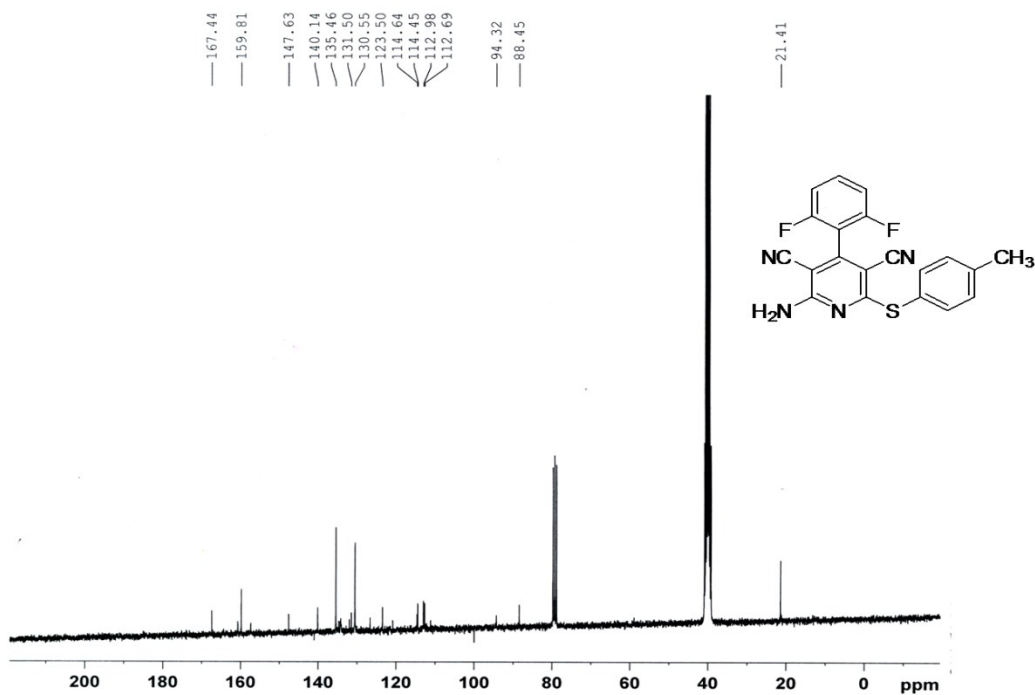

Spectrum 47.  $^{13}\text{C}$  – NMR of compound 5q

DM-28 #124 RT: 0.55 AV: 1 NL: 6.68E8  
T: FTMS + p ESI Full ms [100.00-1500.00]

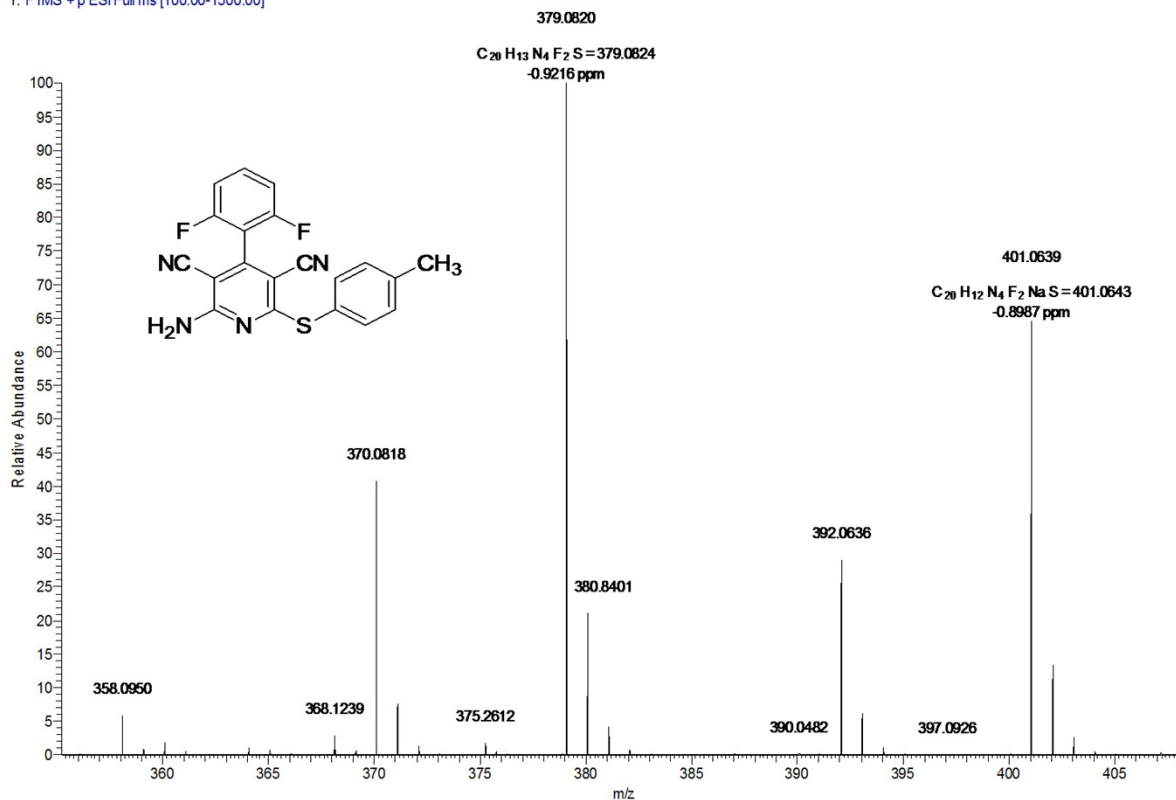

Spectrum 48. HRMS of compound 5q

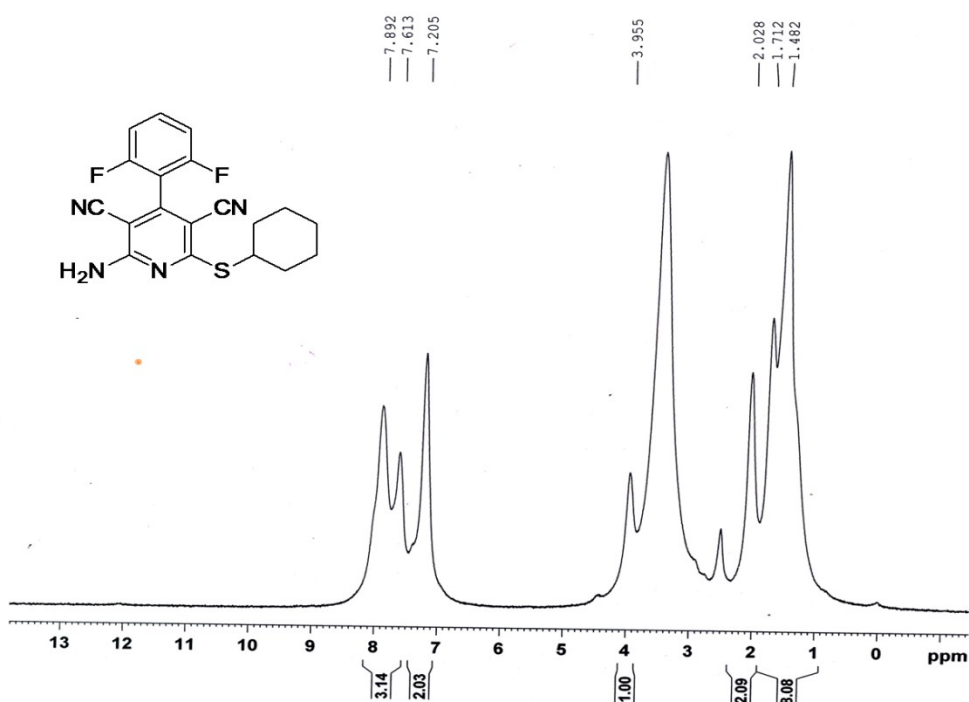

Spectrum 49. <sup>1</sup>H – NMR of compound 5r

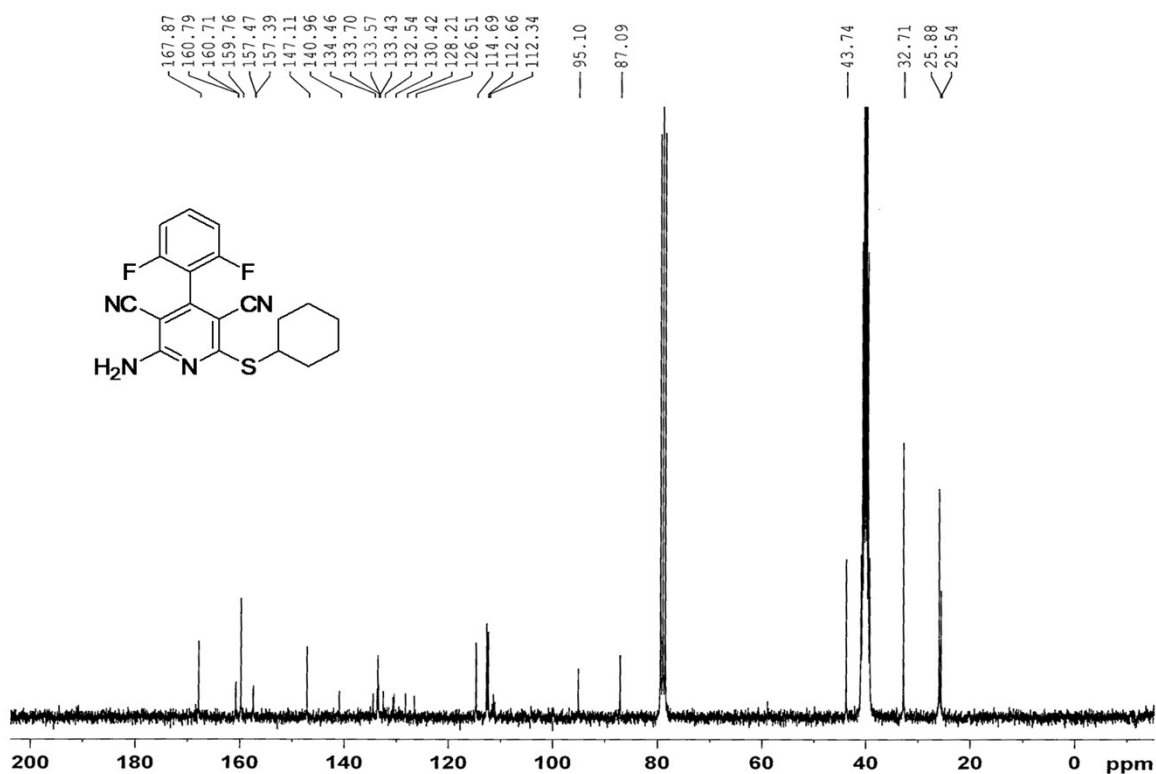

Spectrum 50. <sup>13</sup>C – NMR of compound 5r

DM-3C #167 RT: 0.74 AV: 1 NL: 6.80E8  
T: FTMS + p ESI Full ms [100.00-1500.00]

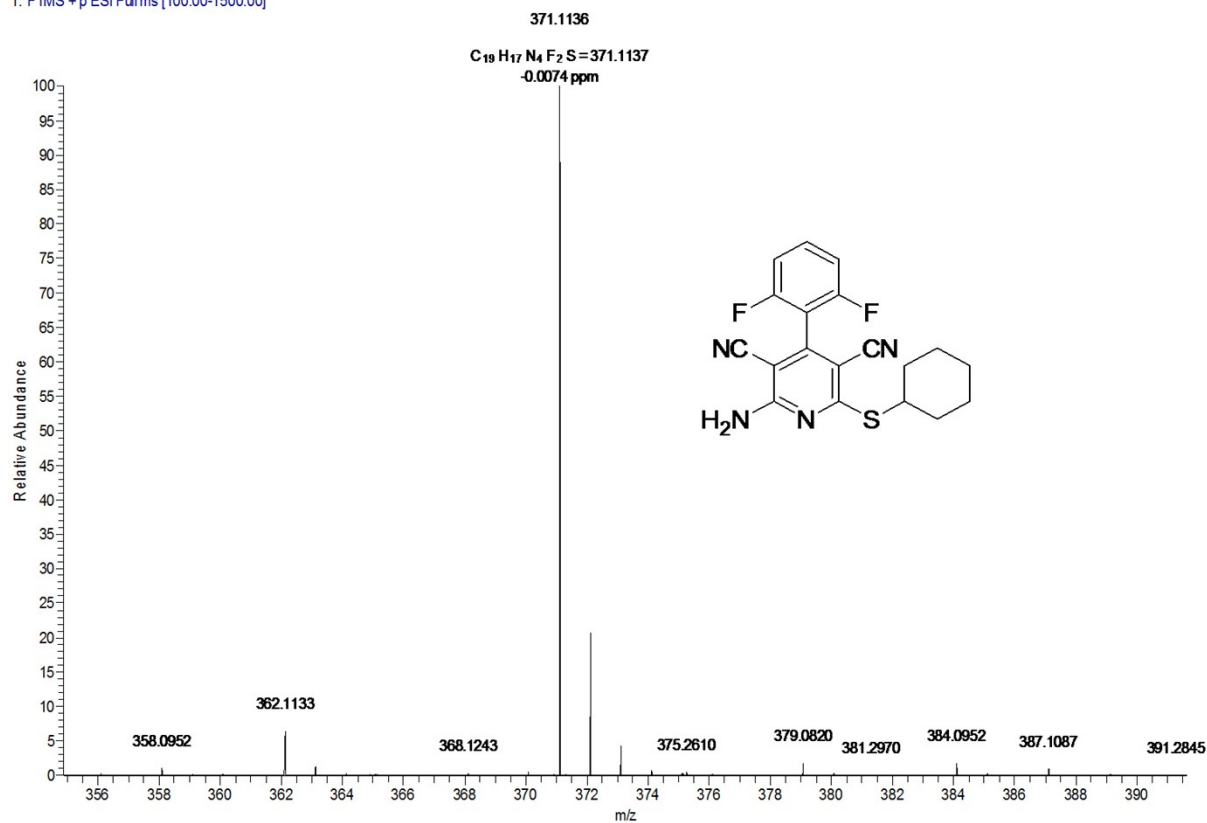

Spectrum 51. HRMS of compound 5r

#### Spectral data of Dihydropyridine dicarbonitriles, 4.

*2-Amino-4-(2,6-dichlorophenyl)-6-(phenylsulfanyl)-1,4-dihydropyridine-3,5-dicarbonitrile, 4a:*

White solid; M. P. 218-220 °C; **<sup>1</sup>H-NMR** (DMSO-d<sup>6</sup>, 300 MHz): 5.63 (s, 1H), 5.98 (s, 1H), 7.35 – 7.45 (m, 3H), 7.48 – 7.55 (m, 5H), 9.16 (s, 1H); **<sup>13</sup>C-NMR**(DMSO-d<sup>6</sup>, 75 MHz): 39.4, 52.67, 88.5, 117.9, 120.2, 129.1, 130.2, 130.3, 130.7, 131.1, 135.7, 143.2, 152.0 ppm.

*2-Amino-4-(2,6-dichlorophenyl)-6-[(4-methylphenyl)sulfanyl]-1,4-dihydropyridine-3,5-*

*dicarbonitrile, 4b:* White solid; M. P. 218-220 °C; **<sup>1</sup>H-NMR** (DMSO-d<sup>6</sup>, 300 MHz): 2.32 (s, 3H), 5.58 (s, 1H), 5.76 (s, 1H), 7.21 (brs, 2H), 7.36 – 7.55 (br d, 2H), 8.78 (s, 1H); **<sup>13</sup>C-NMR** (DMSO-d<sup>6</sup>, 75 MHz): 21.2, 39.2, 52.9, 58.9, 87.4, 117.7, 120.2, 126.1, 128.8, 129.7, 130.3, 130.6, 131.9, 135.4, 135.7, 139.1, 143.9, 151.9 ppm.

*2-Amino-6-[(4-chlorophenyl)sulfanyl]-4-(2,6-dichlorophenyl)-1,4-dihydropyridine-3,5-*

*dicarbonitrile, 4c:* Pale yellow solid; M. P. 284-286 °C; **<sup>1</sup>H-NMR** (DMSO-d<sup>6</sup>, 300 MHz): 5.60 (s, 1H), 5.66 (brs, 2H), 7.20 (d, 1H, J = 7.3 Hz), 7.35 (s, 4H), 7.42 (d, 2H, J = 6.6 Hz), 8.86 (brs, 1H); **<sup>13</sup>C-NMR**(DMSO-d<sup>6</sup>, 75 MHz): 39.2, 53.1, 88.4, 117.4, 120.1, 128.6, 129.7, 129.85, 133.1, 134.7, 135.5, 142.9, 151.8 ppm.

*2-Amino-6-[(4-bromophenyl)sulfanyl]-4-(2,6-dichlorophenyl)-1,4-dihydropyridine-3,5-*

*dicarbonitrile, 4d:* Off white solid; M. P. 278-280 °C; **<sup>1</sup>H-NMR** (DMSO-d<sup>6</sup>, 300 MHz): 5.36 (brs, 2H), 5.61 (s, 1H), 7.14 (t, 1H, J = 8.4 Hz), 7.31 (t, 4H, J = 8.4 Hz), 7.47 (d, 2H, J = 8.4 Hz), 8.75 (brs, 1H); **<sup>13</sup>C-NMR**(DMSO-d<sup>6</sup>, 75 MHz): 39.0, 55.3, 88.6, 128.7, 129.2, 129.5, 132.4, 132.7, 133.1, 135.2, 137.1, 142.7, 151.7.

*2-Amino-6-(cyclohexylsulfanyl)-4-(2,6-dichlorophenyl)-1,4-dihydropyridine-3,5-dicarbonitrile,*

**4e:** Pale yellow solid; M. P. 188-190 °C; **<sup>1</sup>H-NMR** (DMSO-d<sup>6</sup>, 300 MHz): 1.31 – 1.40 (m, 6H), 1.56 (d, 1H, J = 5.1 Hz), 1.74 (d, 3H, J = 3.9 Hz), 1.95 (d, 1H, J = 7.5 Hz), 5.51 (s, 1H), 5.83 (s, 2H), 7.27 – 7.33 (m, 1H), 7.43 (d, 2H, J = 8.1 Hz), 9.15 (brs, 1H); **<sup>13</sup>C-NMR**(DMSO-d<sup>6</sup>, 75 MHz): 25.4, 25.5, 33.1, 33.4, 46.4, 52.8, 87.5, 118.1, 120.3, 129.1, 130.1, 135.9, 144.3, 151.8 ppm.

*2-Amino-6-(butylsulfanyl)-4-(2,6-dichlorophenyl)-1,4-dihydropyridine-3,5-dicarbonitrile, 4f:*

Pale yellow solid; M. P. 118-120 °C; <sup>1</sup>H-NMR (DMSO-d<sup>6</sup>, 300 MHz): 0.88 (t, 3H, J = 7.5 Hz), 1.39 (sextet, 2H, J = 7.5 Hz), 1.58 (quintet, 2H, J = 7.5 Hz), 2.86 - 2.92 (m, 2H), 5.50 (s, 1H), 5.65 (s, 2H), 7.21 (t, 1H, J = 7.8 Hz), 7.35 (d, 2H, J = 7.5 Hz), 9.07 (s, 1H); <sup>13</sup>C-NMR(DMSO-d<sup>6</sup>, 75 MHz): 13.1, 20.8, 31.1, 32.1, 38.4, 52.5, 85.4, 117.3, 119.7, 128.1, 135.2, 144.7, 151.1 ppm.

*2-Amino-4-(2,6-dichlorophenyl)-6-(ethylsulfanyl)-1,4-dihydropyridine-3,5-dicarbonitrile, 4g:*

Grey solid; M. P. 158-160 °C; <sup>1</sup>H-NMR (DMSO-d<sup>6</sup>, 300 MHz): 1.29 (t, 3H, J = 7.5 Hz), 2.91 - 2.95 (m, 2H), 5.51 (s, 1H), 5.67 (s, 2H), 7.23 (d, 1H, J = 8.4 Hz), 7.35 (d, 2H, J = 7.8 Hz), 7.24 (t, 1H, J = 6.2 Hz), 9.08 (s, 1H); <sup>13</sup>C-NMR(DMSO-d<sup>6</sup>, 75 MHz): 15.3, 27.4, 39.0, 53.1, 86.2, 114.3, 117.9, 120.3, 128.8, 129.7, 132.4, 133.4, 135.8, 145.0, 151.7, 159.9, 168.1 ppm.

*2-Amino-4-(2,6-dimethylphenyl)-6-(phenylsulfanyl)-1,4-dihydropyridine-3,5-dicarbonitrile, 4h:*

Off white solid; M. P. 276-278 °C; <sup>1</sup>H-NMR (DMSO-d<sup>6</sup>, 300 MHz): 2.32 (s, 6H), 5.20 (s, 1H), 5.75 (s, 2H), 6.99 - 7.04 (m, 3H), 7.38 - 7.50 (m, 5H), 8.94 (s, 1H); <sup>13</sup>C-NMR(DMSO-d<sup>6</sup>, 75 MHz): 37.3, 54.2, 91.3, 118.0, 120.5, 127.6, 128.9, 130.1, 130.5, 131.1, 138.2, 141.4, 150.9 ppm.

*2-Amino-6-[(4-chlorophenyl)sulfanyl]-4-(2,6-dimethylphenyl)-1,4-dihydropyridine-3,5-*

*dicarbonitrile, 4j:* Off white solid; M. P. 300-302 °C; <sup>1</sup>H-NMR (DMSO-d<sup>6</sup>, 300 MHz): 2.31 (s, 6H), 5.15 (s, 1H), 5.56 (s, 2H), 6.95 - 7.04 (m, 3H), 7.37 - 7.45 (m, 4H), 8.81 (s, 1H); <sup>13</sup>C-NMR (DMSO-d<sup>6</sup>, 75 MHz): 37.2, 54.5, 91.1, 117.8, 120.4, 127.6, 128.9, 129.9, 132.9, 134.6, 137.9, 141.2, 150.7 ppm.

*2-Amino-6-[(4-methoxyphenyl)sulfanyl]-4-(2,6-dimethylphenyl)-1,4-dihydropyridine-3,5-*

*dicarbonitrile, 4k:* Yellow solid; M. P. 298 - 300 °C; <sup>1</sup>H-NMR (DMSO-d<sup>6</sup>, 300 MHz): 2.07 (s, 6H), 2.88 (s, 3H), 5.10 (s, 1H), 5.44 (s, 2H), 6.91 - 6.96 (m, 3H), 7.11 (d, 2H, J = 7.5 Hz), 7.42 - 7.45 (m, 2H), 8.37 (s, 1H); <sup>13</sup>C-NMR (DMSO-d<sup>6</sup>, 75 MHz): 19.7, 37.0, 55.5, 87.6, 94.2, 115.0, 117.6, 128.0, 129.6, 133.7, 134.8, 137.3, 150.7, 159.0, 160.0, 161.0, 168.5 ppm.

*2-Amino-4-(2,6-dimethoxyphenyl)-6-(phenylsulfanyl)-1,4-dihydropyridine-3,5-dicarbonitrile, 4l:*

Yellow solid; M. P. 140-142 °C; <sup>1</sup>H-NMR (DMSO-d<sup>6</sup>, 300 MHz): 3.73 (s, 6H), 5.09 (s, 1H), 5.50

(s, 1H), 5.57 (s, 1H), 6.63 (d, 2H, J = 8.1 Hz), 7.19 (t, 1H, J = 8.1 Hz), 7.31 – 7.34 (m, 1H), 7.37 – 7.39 (m, 1H), 8.87 (brs, 1H); <sup>13</sup>C-NMR(DMSO-d<sup>6</sup>, 75 MHz): 31.7, 56.5, 92.0, 105.0, 118.7, 119.1, 121.2, 128.2, 129.2, 129.9, 129.9, 131.7, 140.8, 151.9, 158.9 ppm.

*2-Amino-4-(2,6-dimethoxyphenyl)-6-[(4-methylphenyl)sulfanyl]-1,4-dihydropyridine-3,5-dicarbonitrile, 4m*: Yellow solid; M. P. 198-200 °C; <sup>1</sup>H-NMR (DMSO-d<sup>6</sup>, 300 MHz): 2.31 (s, 3H), 3.72 (s, 6H), 5.06 (s, 1H), 5.49 (s, 1H), 5.56 (s, 1H), 6.61 (d, 2H, J = 8.1 Hz), 7.20 (d, 3H, J = 8.1 Hz), 7.32 (d, 2H, J = 8.1 Hz), 8.71 (s, 1H); <sup>13</sup>C-NMR(DMSO-d<sup>6</sup>, 75 MHz): 21.2, 31.7, 54.3, 56.4, 91.1, 104.9, 118.8, 119.2, 121.4, 127.7, 129.1, 130.5, 130.7, 138.3, 141.5, 151.9, 158.9 ppm.

*2-Amino-6-[(4-chlorophenyl)sulfanyl]-4-(2,6-dimethoxyphenyl)-1,4-dihydropyridine-3,5-dicarbonitrile, 4n*: Yellow solid; M. P. 182-184 °C; <sup>1</sup>H-NMR (DMSO-d<sup>6</sup>, 300 MHz): 3.72 (s, 6H), 5.08 (s, 1H), 5.40 (s, 1H), 5.44 (s, 1H), 6.58 (d, 2H, J = 6.3 Hz), 7.17 (t, 1H, J = 7.5 Hz), 7.38 (s, 4H), 8.81 (brs, 1H); <sup>13</sup>C-NMR(DMSO-d<sup>6</sup>, 75 MHz): 31.7, 54.4, 56.4, 92.0, 105.0, 118.6, 119.0, 121.3, 129.2, 130.4, 131.6, 133.7, 140.6, 151.8, 158.8 ppm.

*2-Amino-4-(2,6-difluorophenyl)-6-(phenylsulfanyl)-1,4-dihydropyridine-3,5-dicarbonitrile, 4o*: White solid; M. P. 264-266 °C; <sup>1</sup>H-NMR (DMSO-d<sup>6</sup>, 300 MHz): 4.90 (s, 1H), 5.83 (s, 2H), 7.02 (t, 2H, J = 8.4 Hz), 7.33 – 7.42 (m, 6H), 9.14 (s, 1H); <sup>13</sup>C-NMR(DMSO-d<sup>6</sup>, 75 MHz): 32.5, 53.3, 89.3, 112.1, 112.4, 118.0, 118.7, 120.5, 128.6, 130.0, 130.2, 130.8, 142.5, 151.6, 159.5, 159.6, 162.8, 162.9 ppm.

*2-Amino-6-[(4-chlorophenyl)sulfanyl]-4-(2,6-difluorophenyl)-1,4-dihydropyridine-3,5-dicarbonitrile, 4p*: White solid; M. P. 242-244 °C; <sup>1</sup>H-NMR (DMSO-d<sup>6</sup>, 300 MHz): 4.87 (s, 1H), 5.68 (s, 2H), 6.41 (t, 2H, J = 8.4 Hz), 7.29 – 7.40 (m, 5H), 9.03 (brs, 1H); <sup>13</sup>C-NMR (DMSO-d<sup>6</sup>, 75 MHz): 32.4, 53.6, 89.1, 111.9, 112.2, 117.8, 118.5, 120.4, 129.3, 129.9, 132.2, 134.3, 137.0, 142.4, 151.4, 159.5, 159.6, 162.8, 162.9 ppm.

*2-Amino-4-(2,6-difluorophenyl)-6-[(4-methylphenyl)sulfanyl]-1,4-dihydropyridine-3,5-dicarbonitrile, 4q*: White solid; M. P. 238-240 °C; <sup>1</sup>H-NMR (DMSO-d<sup>6</sup>, 300 MHz): 2.31 (s, 3H), 4.86 (s, 1H), 5.72 (s, 2H), 6.94 (t, 2H, J = 8.4 Hz), 7.18 (d, 2H, J = 8.1 Hz), 7.26 – 7.31 (m,

3H), 8.91 (brs, 1H); <sup>13</sup>C-NMR(DMSO-d<sup>6</sup>, 75 MHz): 21.2, 32.4, 53.4, 88.2, 111.9, 112.2, 118.1, 120.5, 126.7, 130.0, 130.6, 131.1, 138.8, 143.3, 151.4, 159.5, 159.6, 162.9, 163.0 ppm.

*2-Amino-6-(cyclohexylsulfanyl)-4-(2,6-difluorophenyl)-1,4-dihydropyridine-3,5-dicarbonitrile,*

**4r**: Off white solid; M. P. 248-250 °C; <sup>1</sup>H-NMR (DMSO-d<sup>6</sup>, 300 MHz): 1.25 – 1.35 (m, 4H), 1.43 – 1.91 (m, 6H), 3.27 (d, 1H), 4.81 (s, 1H), 5.45 (s, 2H), 6.82 – 6.88 (m, 1H), 7.07 – 7.32 (m, 2H), 9.04 (s, 1H); <sup>13</sup>C-NMR(DMSO-d<sup>6</sup>, 75 MHz): 25.4, 25.7, 32.2, 32.7, 46.8, 53.7, 88.7, 111.7, 112.0, 118.5, 120.6, 129.6, 129.7, 143.6, 151.3, 159.6, 159.6, 162.9, 163.0 ppm.

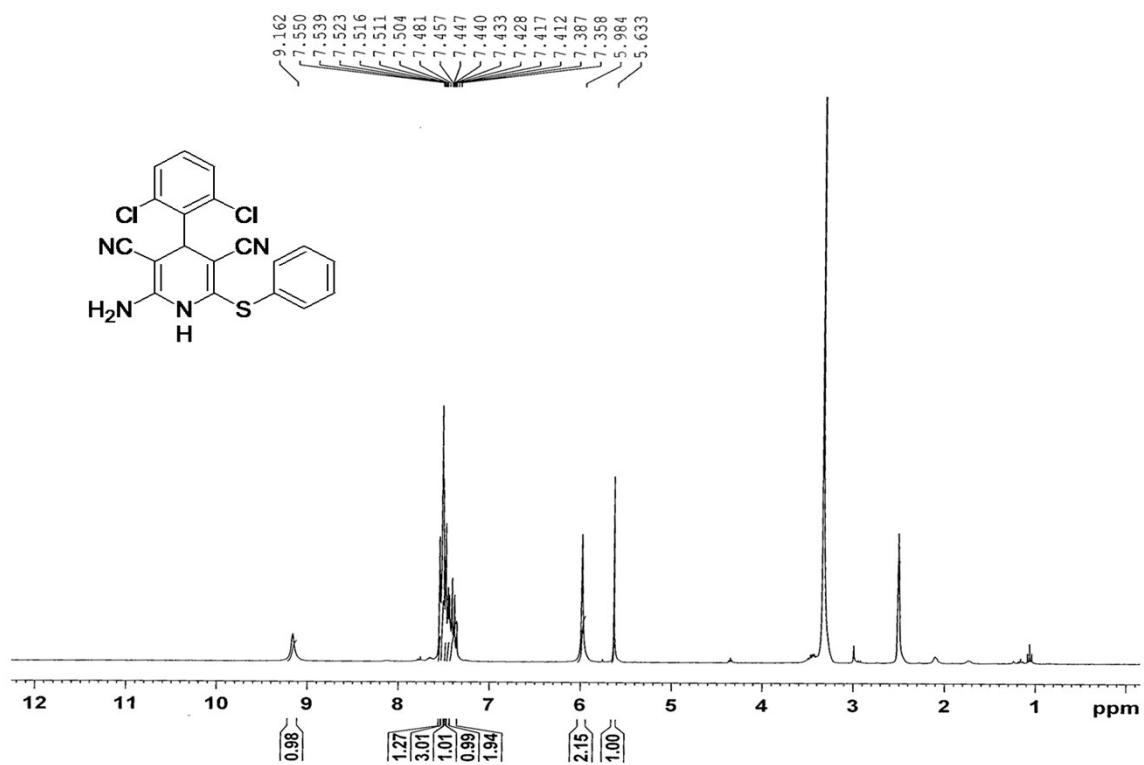

Spectrum 1. <sup>1</sup>H – NMR of compound 4a

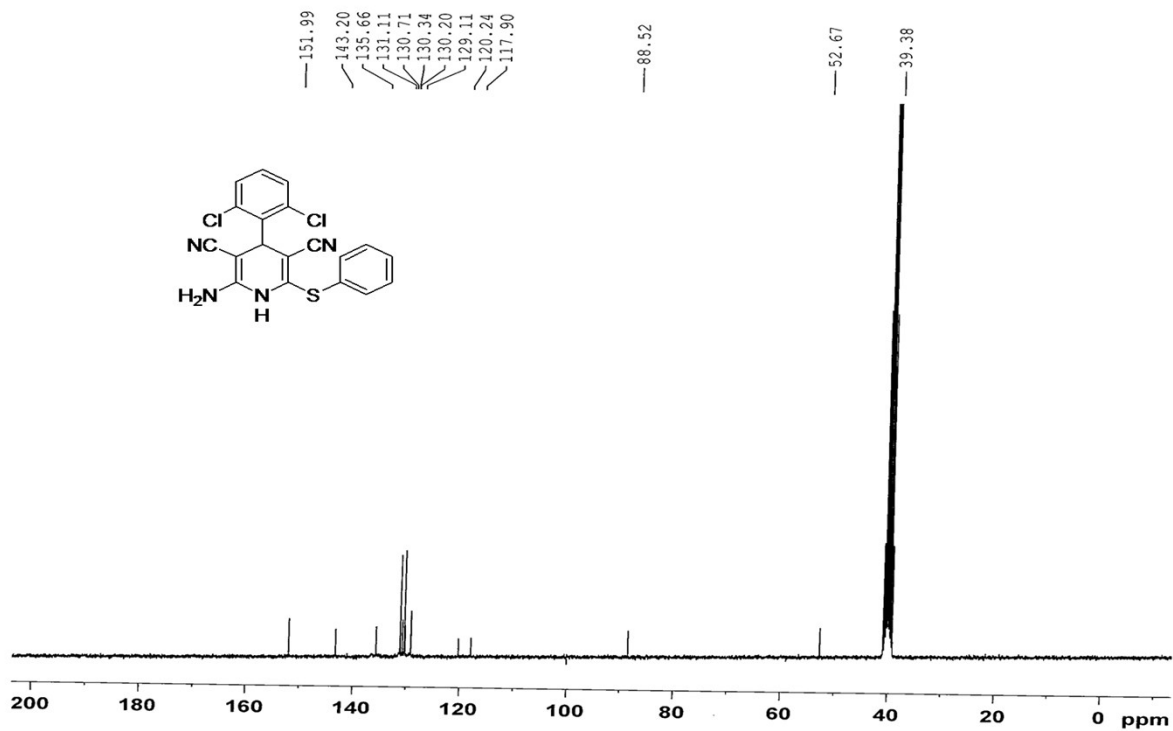

Spectrum 2. <sup>13</sup>C – NMR of compound 4a



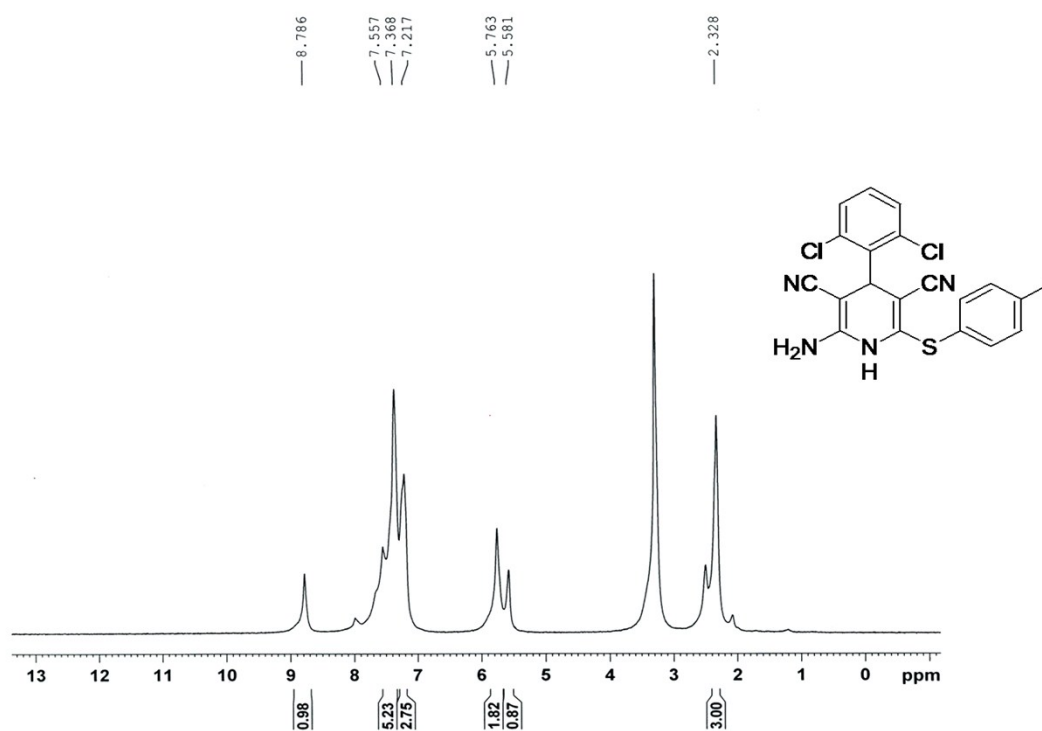

Spectrum 3.  $^1\text{H}$  – NMR of compound 4b

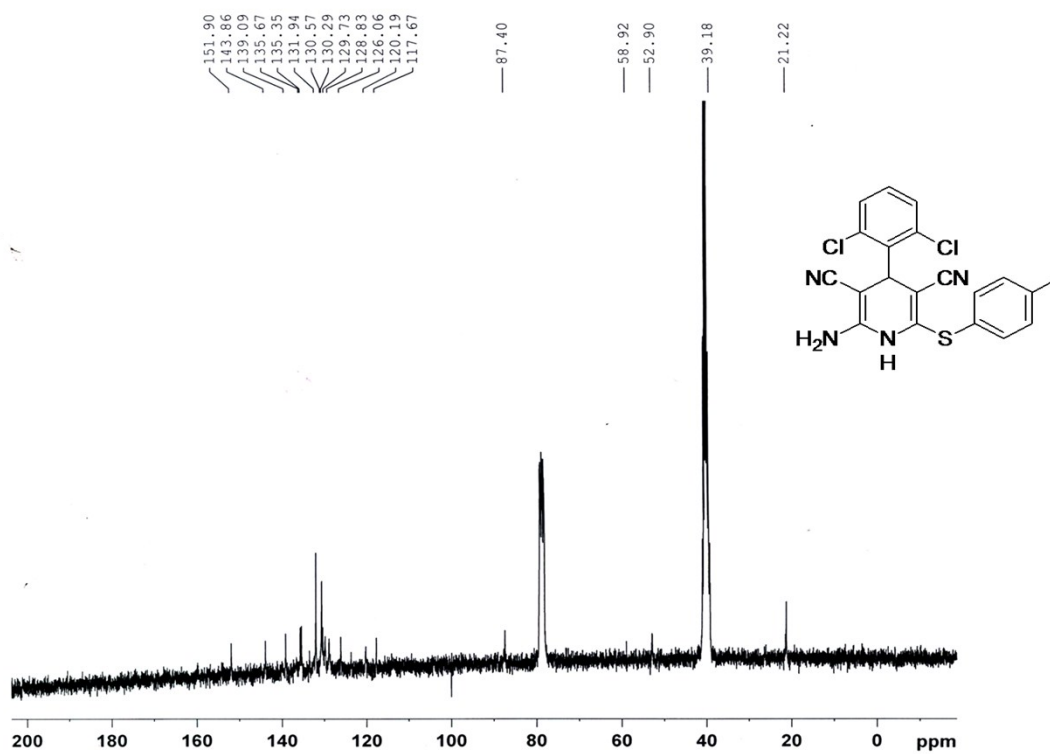

Spectrum 4.  $^{13}\text{C}$  – NMR of compound 4b

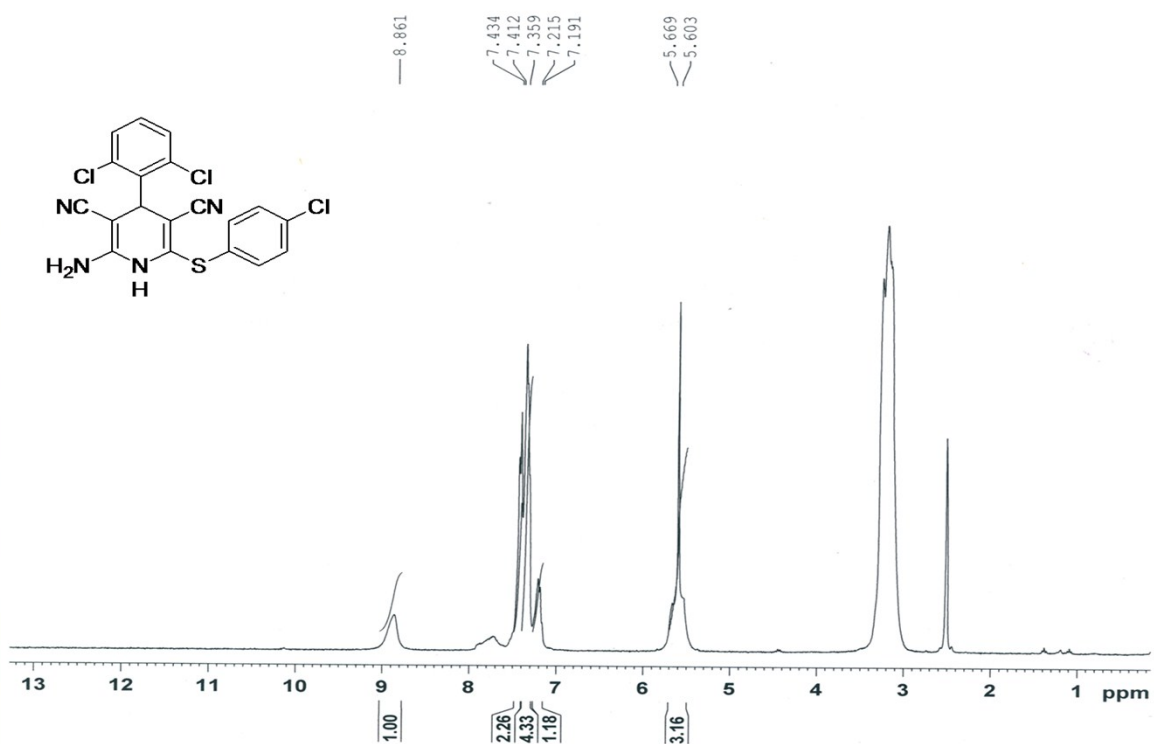

Spectrum 5. <sup>1</sup>H – NMR of compound 4c

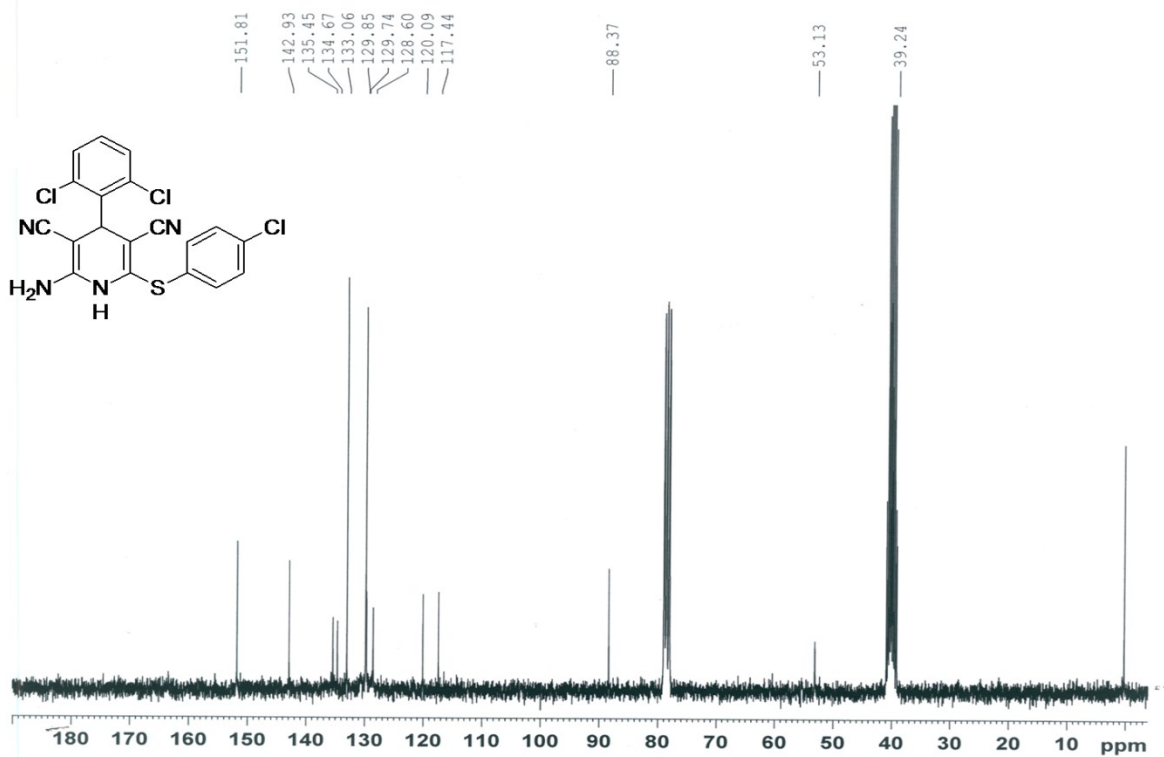

Spectrum 6. <sup>13</sup>C – NMR of compound 4c

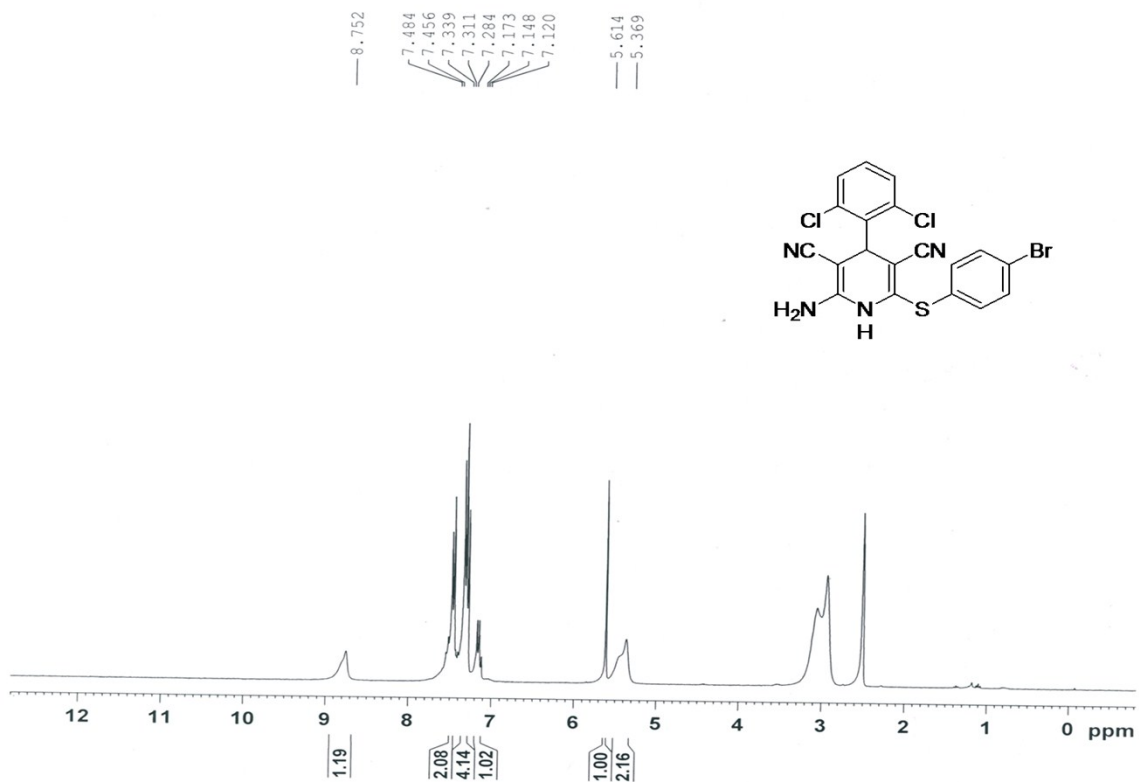

Spectrum 7.  $^1\text{H-NMR}$  of compound 4d

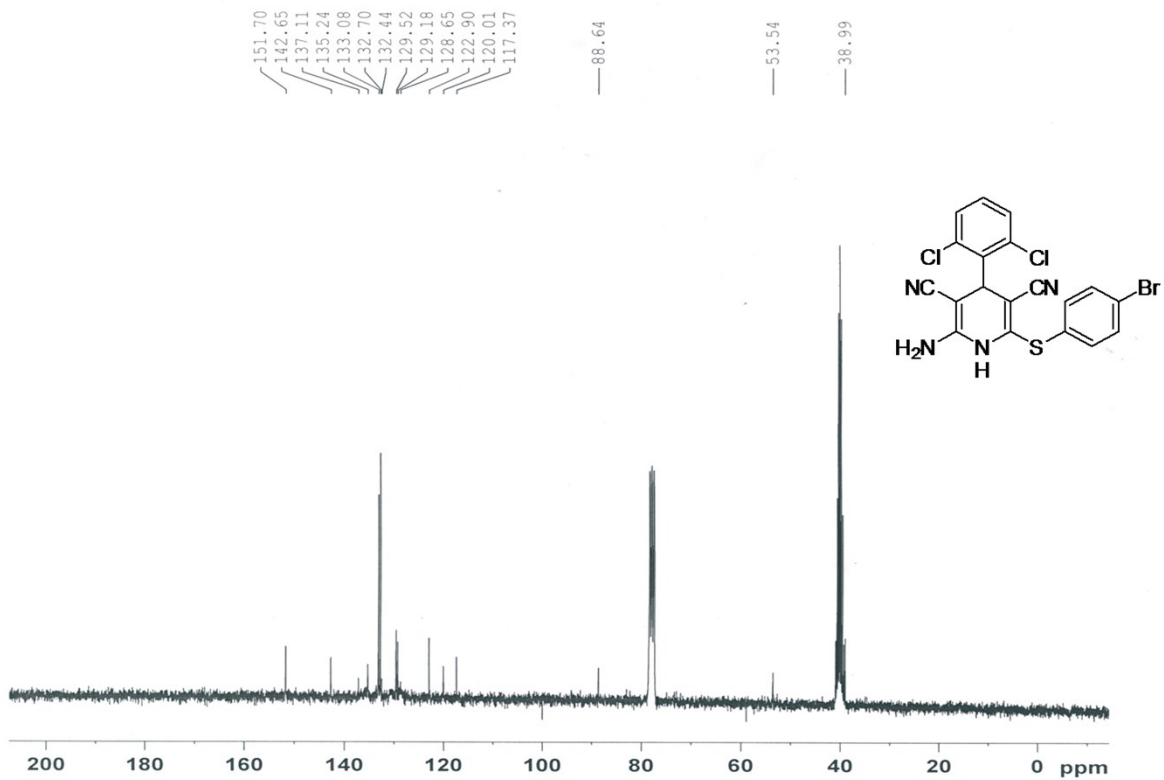

Spectrum 8.  $^{13}\text{C-NMR}$  of compound 4d

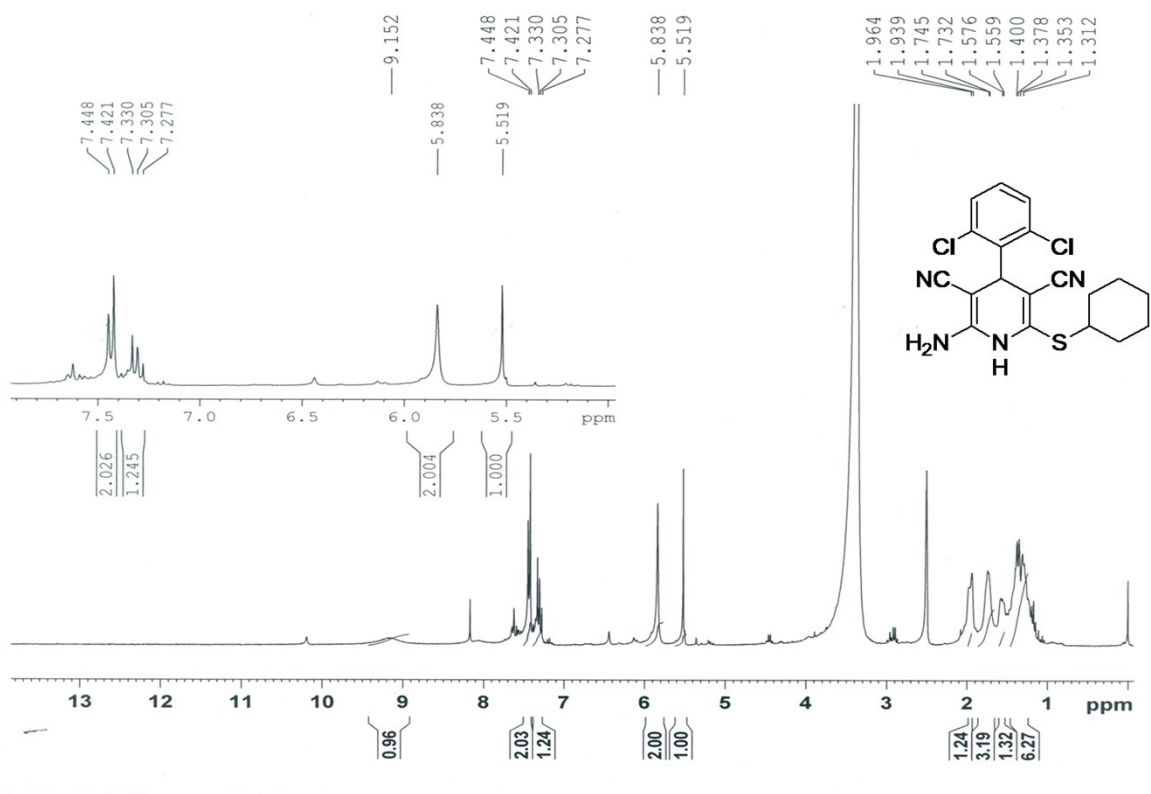

Spectrum 9. <sup>1</sup>H – NMR of compound 4e

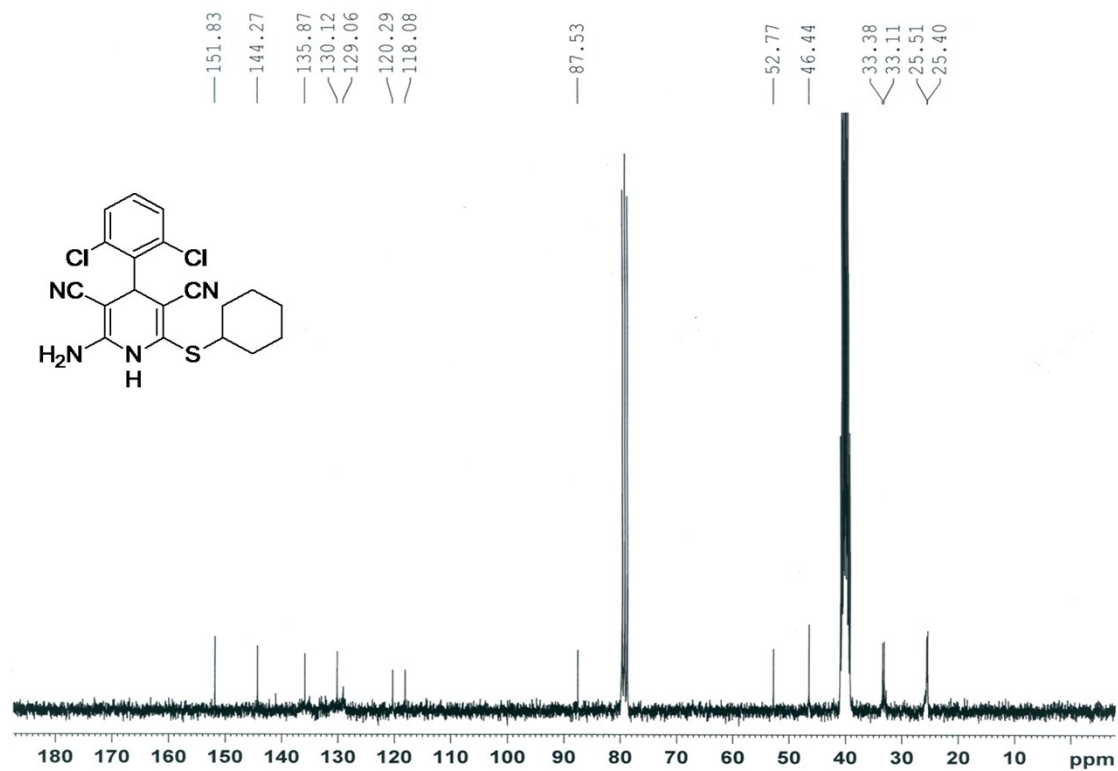

Spectrum 10. <sup>13</sup>C – NMR of compound 4e

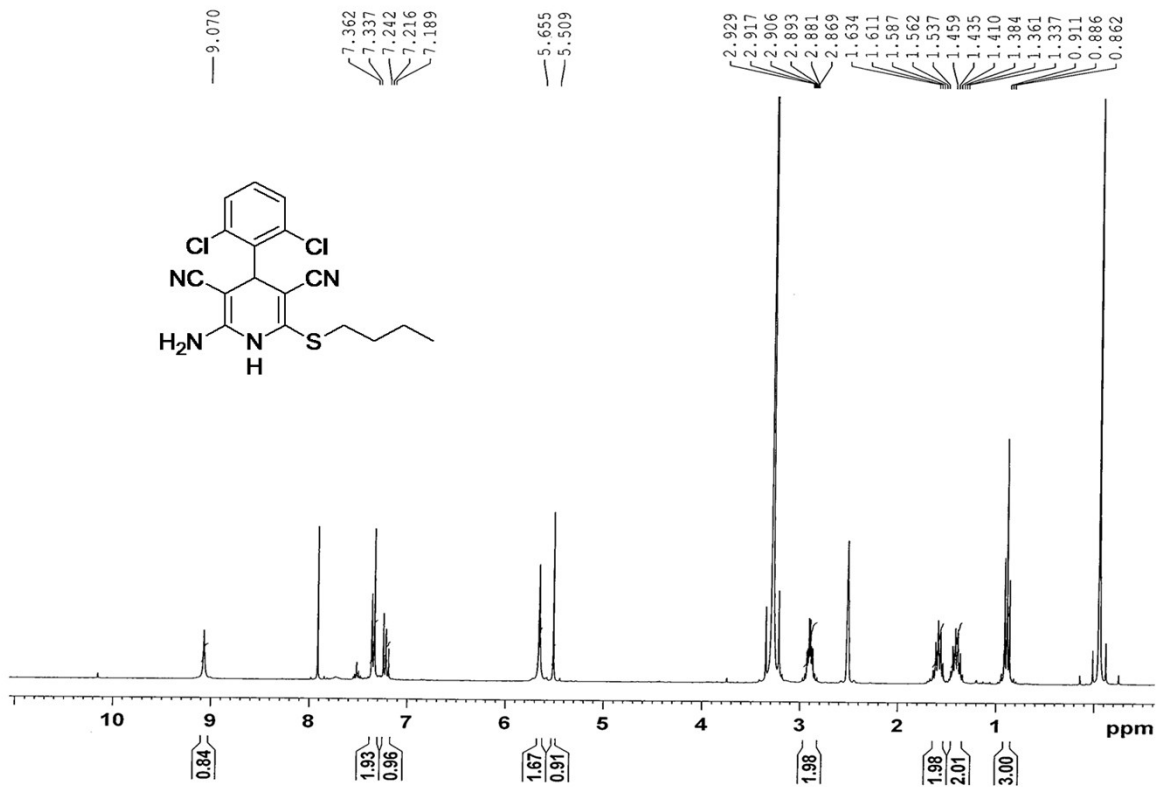

Spectrum 11. <sup>1</sup>H – NMR of compound 4f

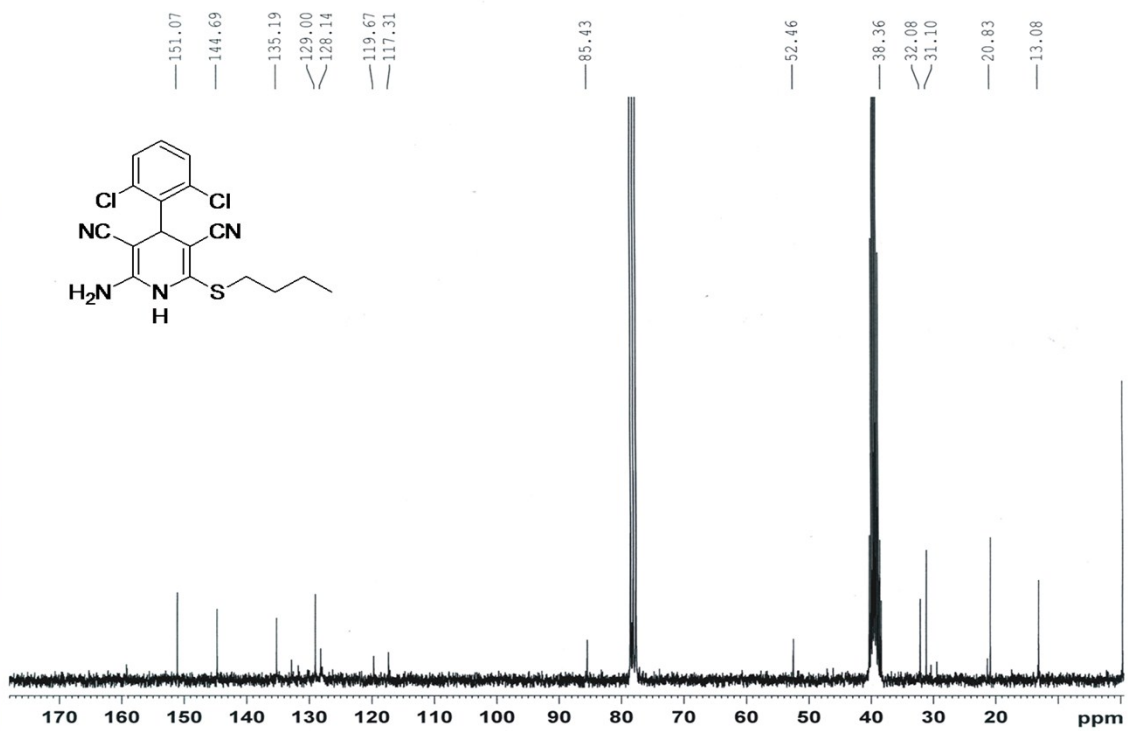

Spectrum 12. <sup>13</sup>C – NMR of compound 4f

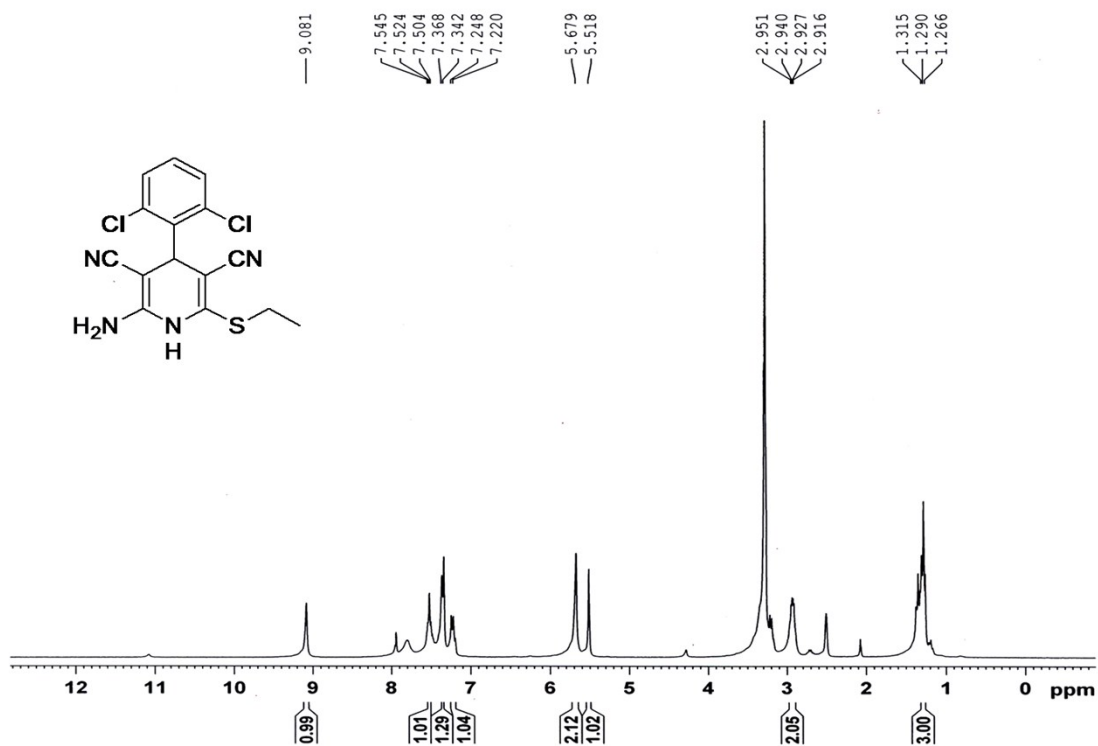

Spectrum 13. <sup>1</sup>H – NMR of compound 4g

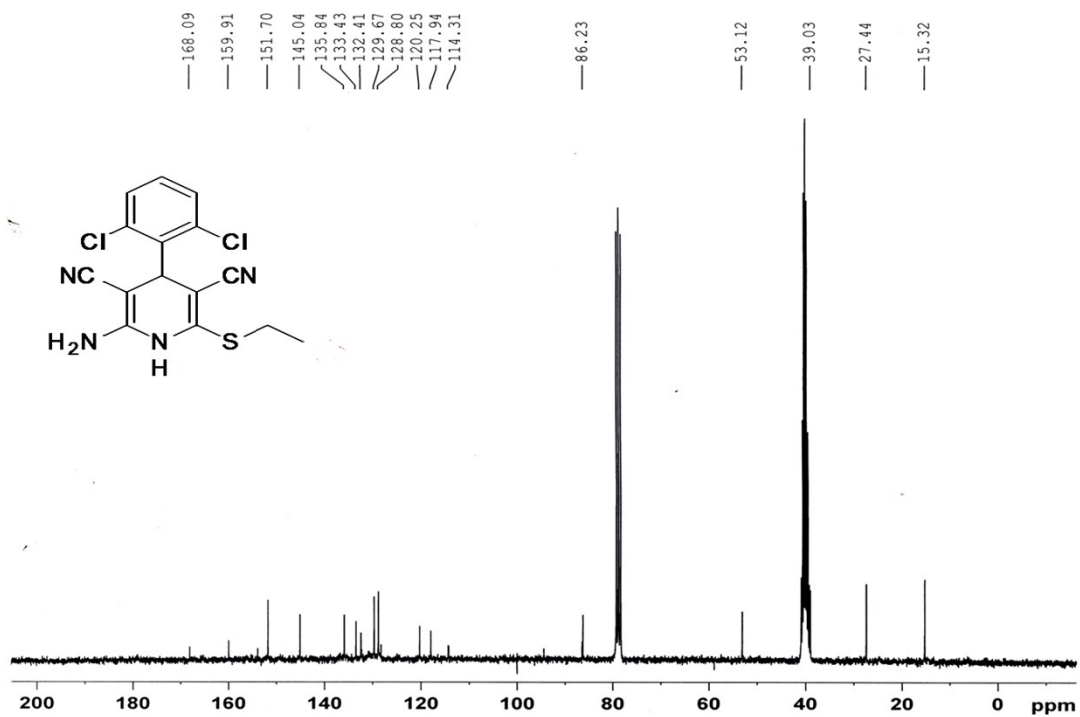

Spectrum 14. <sup>13</sup>C – NMR of compound 4g

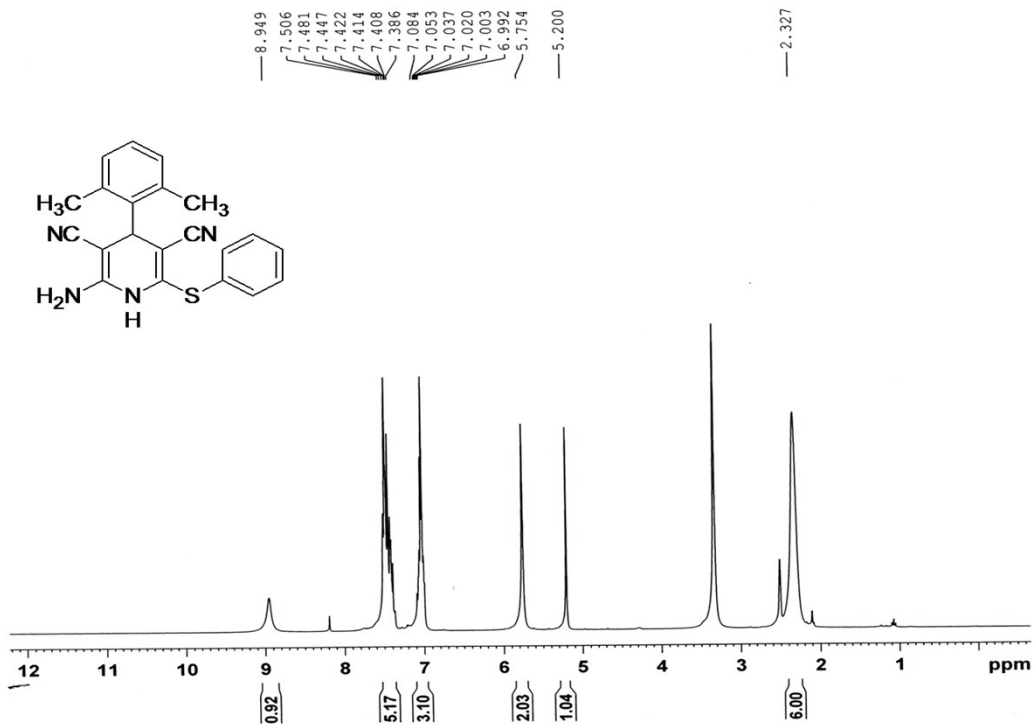

Spectrum 15.  $^1\text{H}$  – NMR of compound 4h

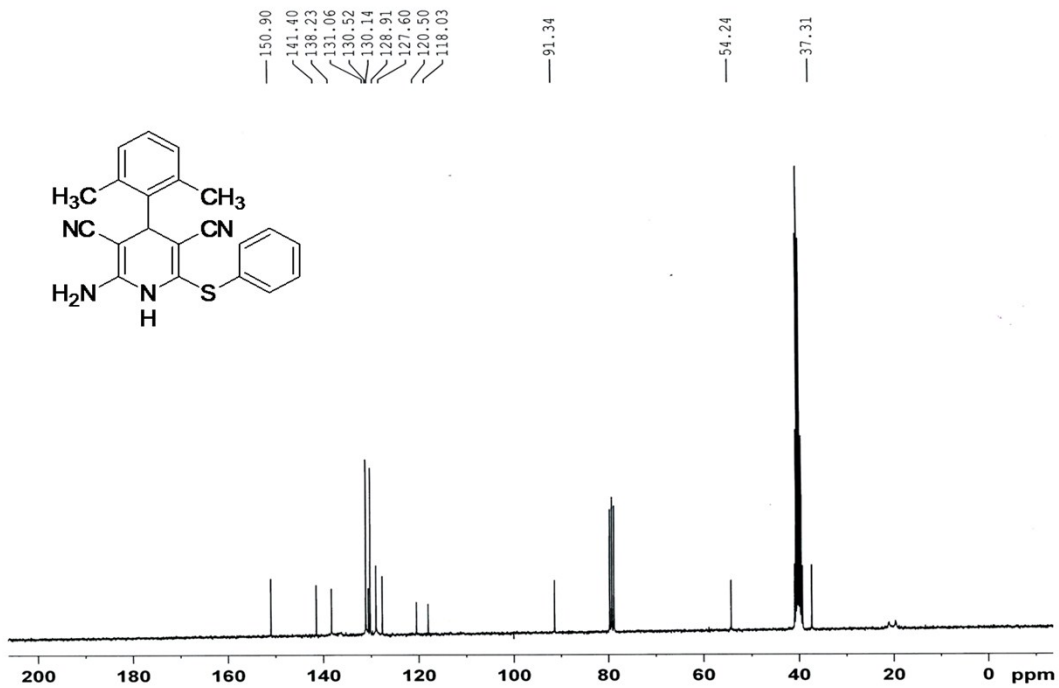

Spectrum 16.  $^{13}\text{C}$  – NMR of compound 4h

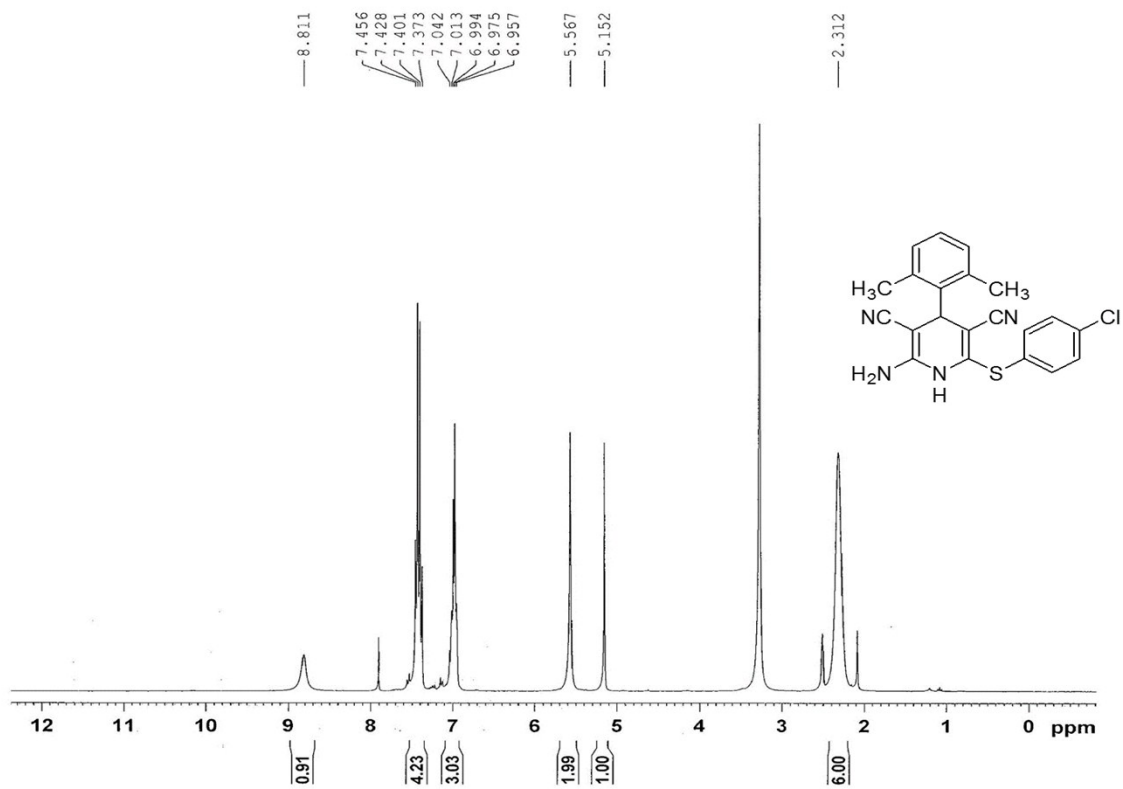

Spectrum 17. <sup>1</sup>H – NMR of compound 4j

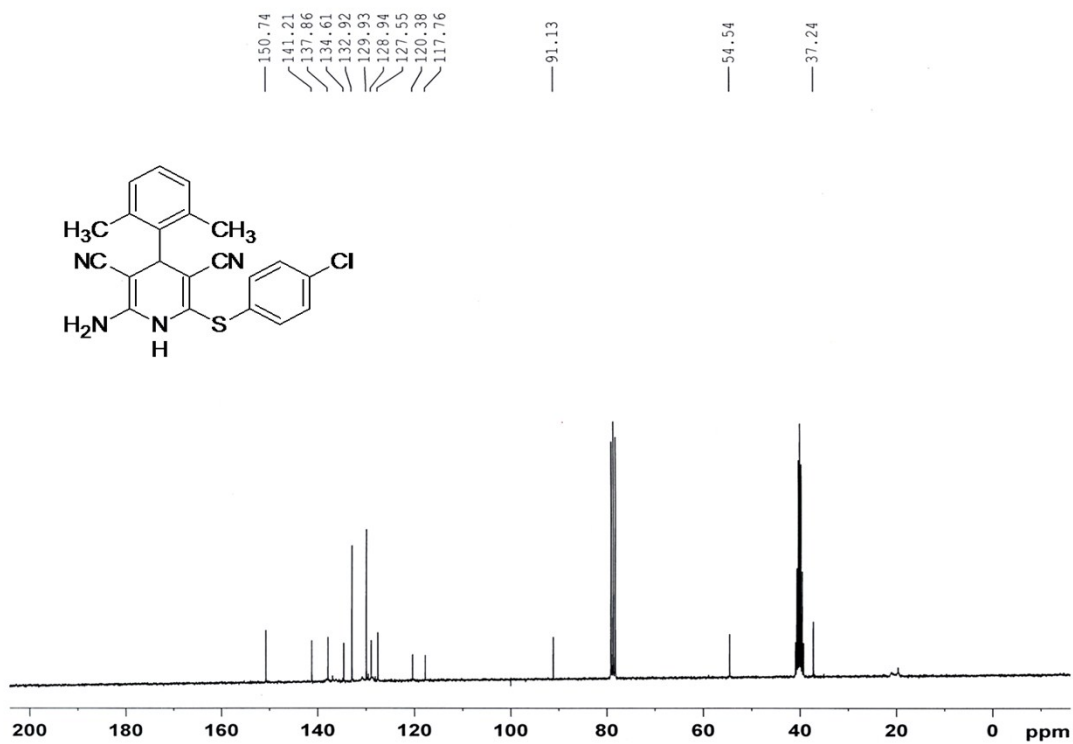

Spectrum 18. <sup>13</sup>C – NMR of compound 4j



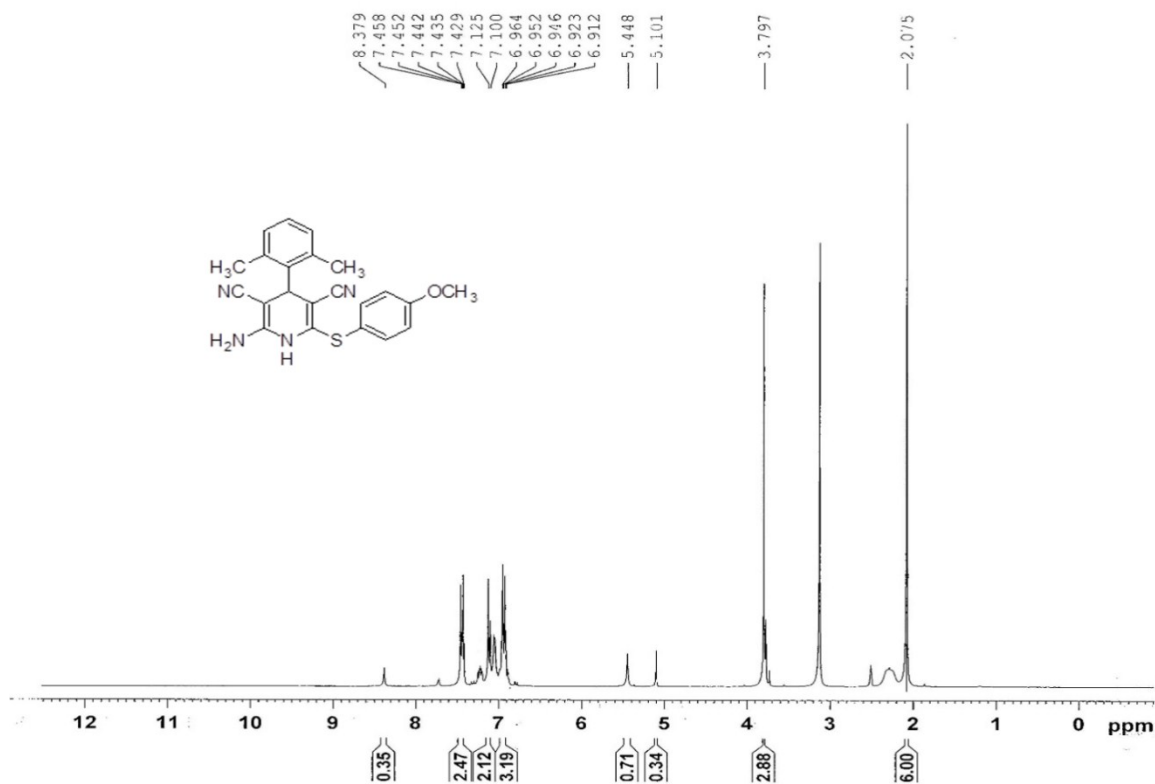

Spectrum 19. <sup>1</sup>H – NMR of compound 4k

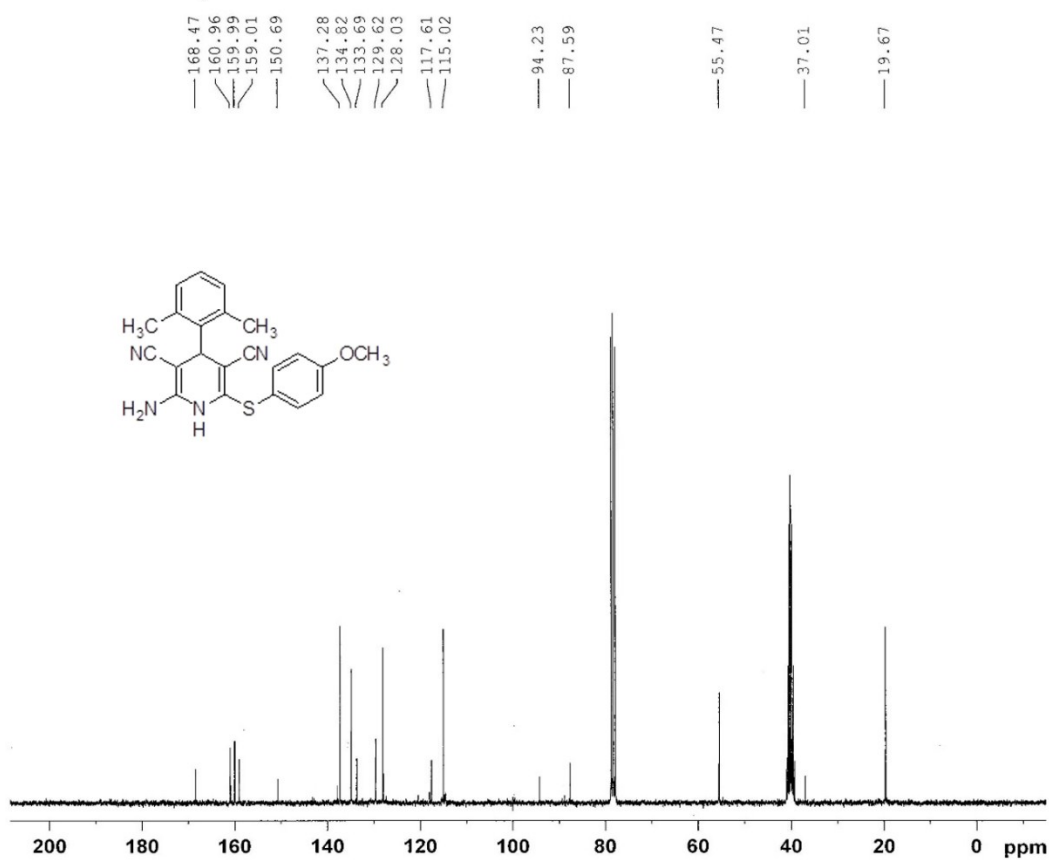

Spectrum 20. <sup>13</sup>C – NMR of compound 4k

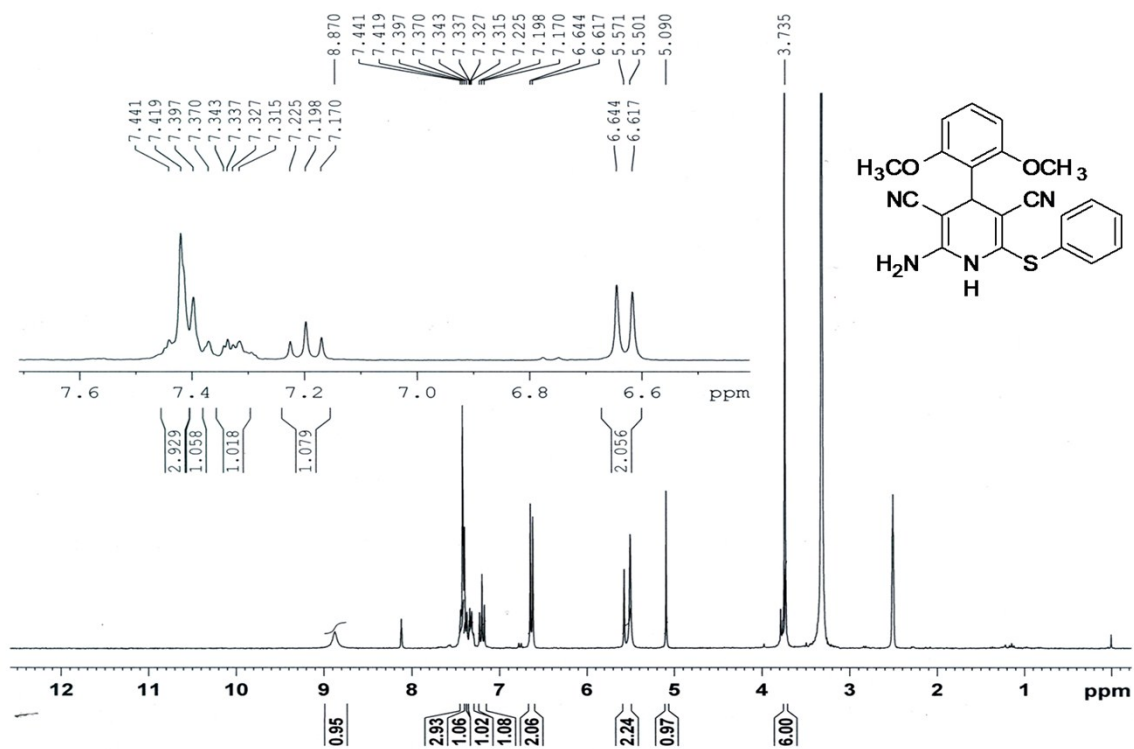

Spectrum 21. <sup>1</sup>H – NMR of compound 4l

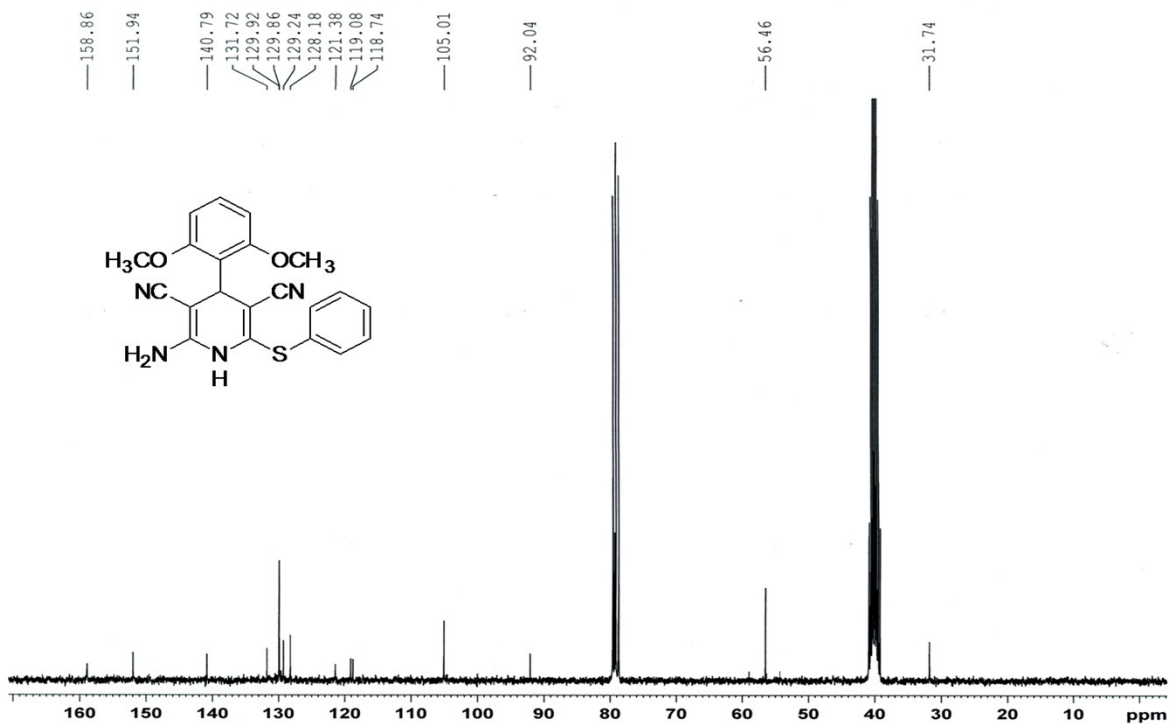

Spectrum 22. <sup>13</sup>C – NMR of compound 4l

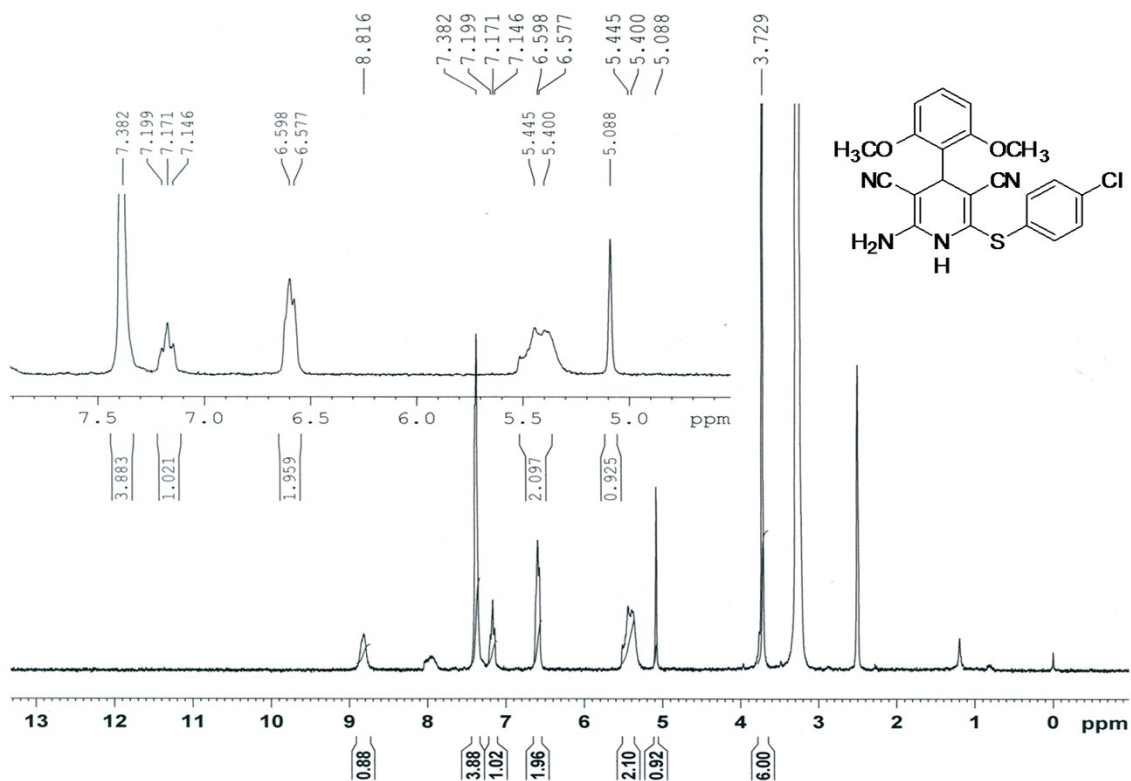

Spectrum 23.  $^1\text{H}$  – NMR of compound 4m

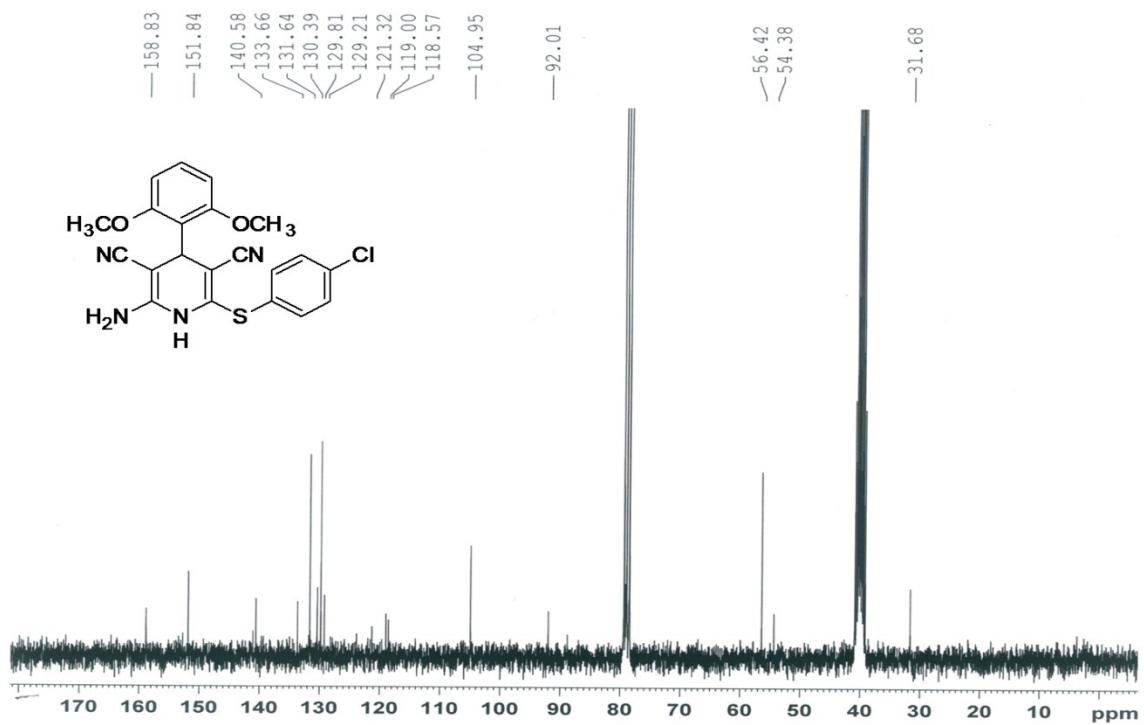

Spectrum 24.  $^{13}\text{C}$  – NMR of compound 4m

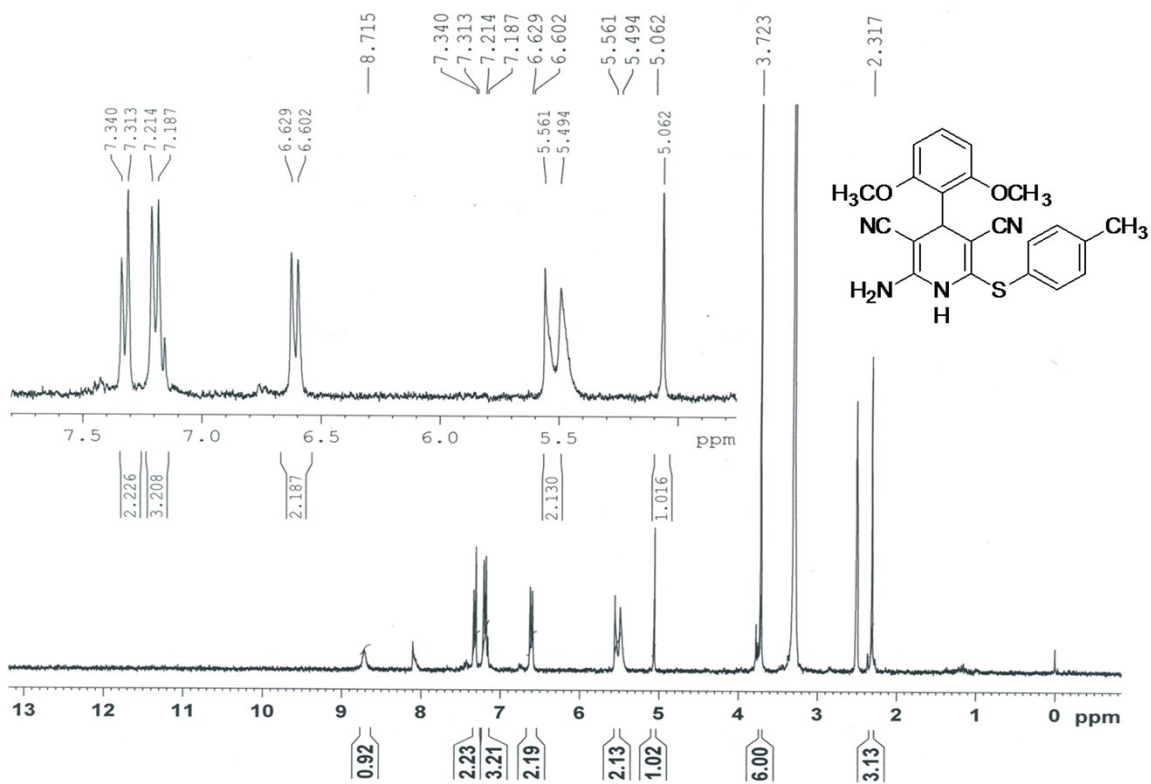

Spectrum 25. <sup>1</sup>H – NMR of compound 4n

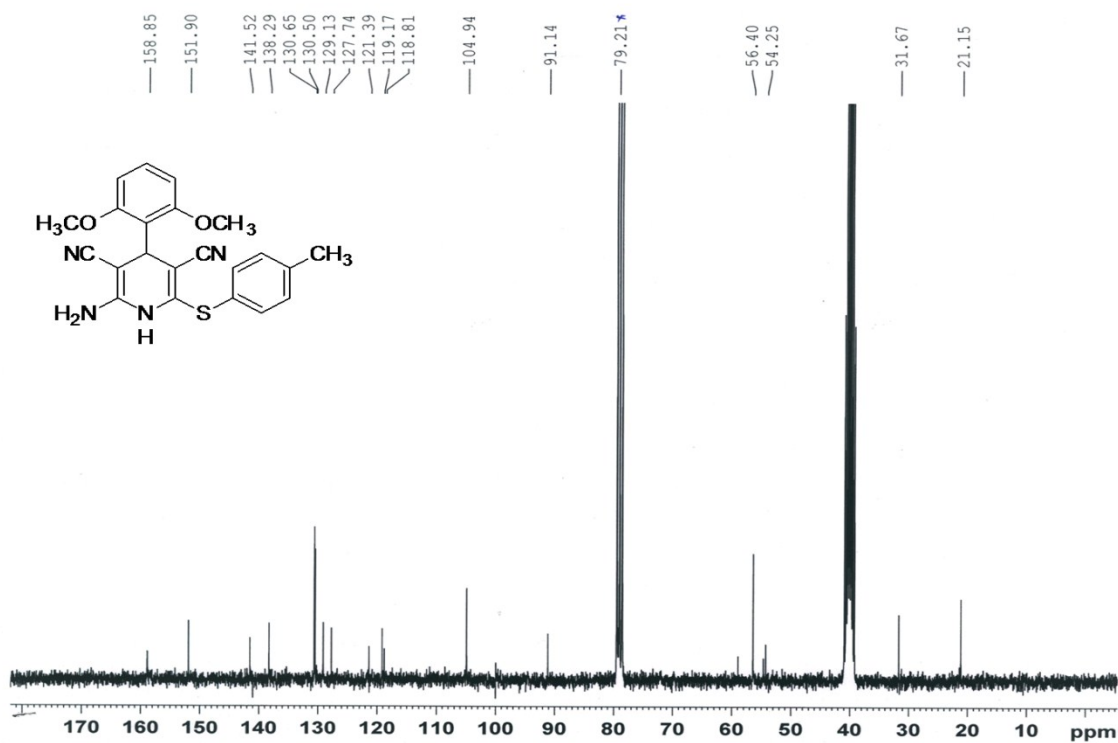

Spectrum 26. <sup>13</sup>C – NMR of compound 4n

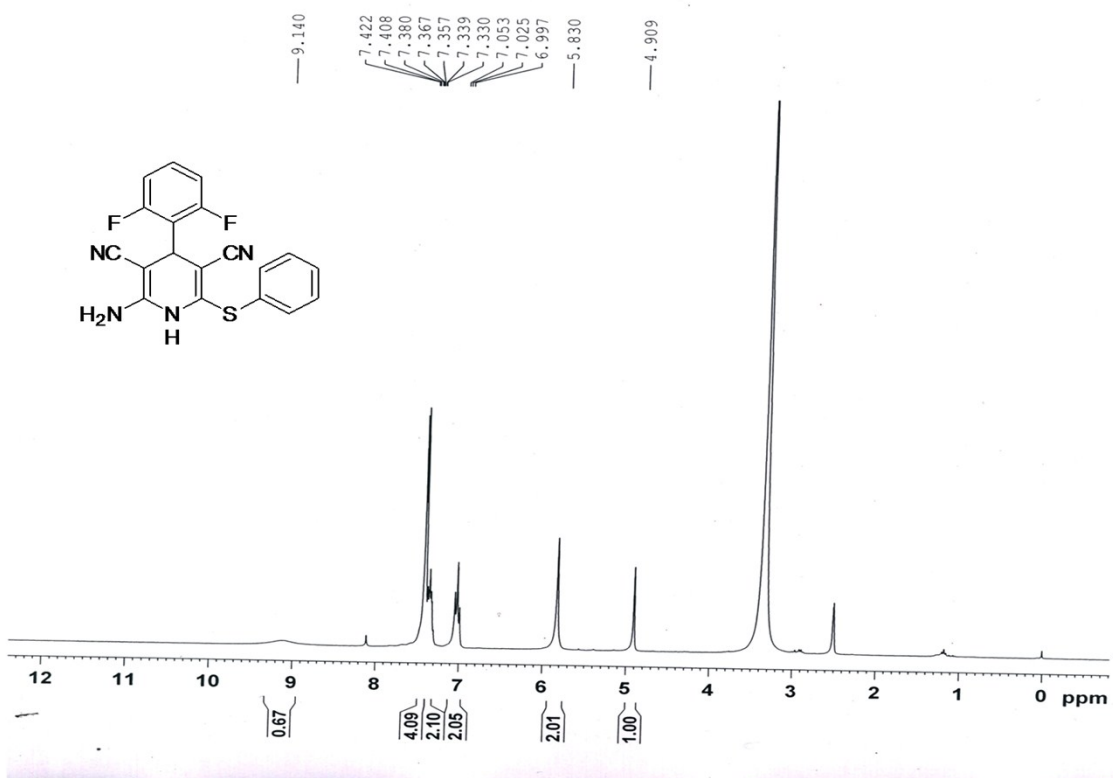

Spectrum 27.  $^1\text{H-NMR}$  of compound 4o

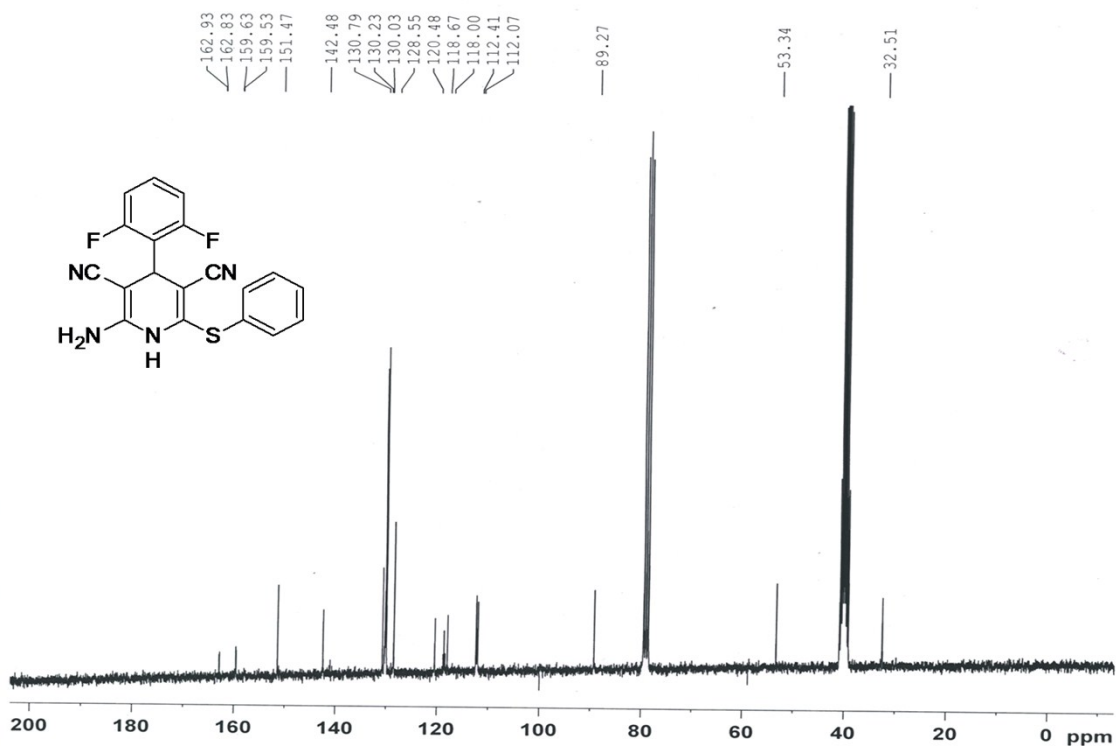

Spectrum 28.  $^{13}\text{C-NMR}$  of compound 4o

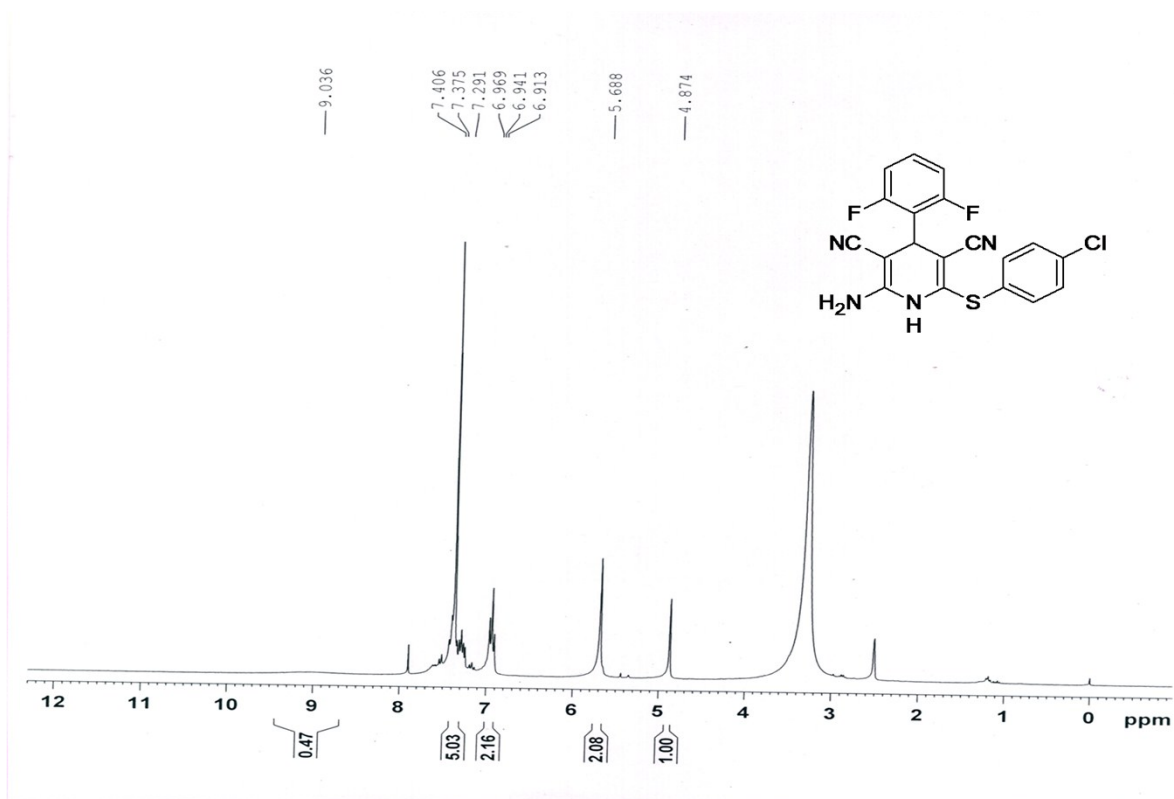

Spectrum 29.  $^1\text{H}$  – NMR of compound 4p

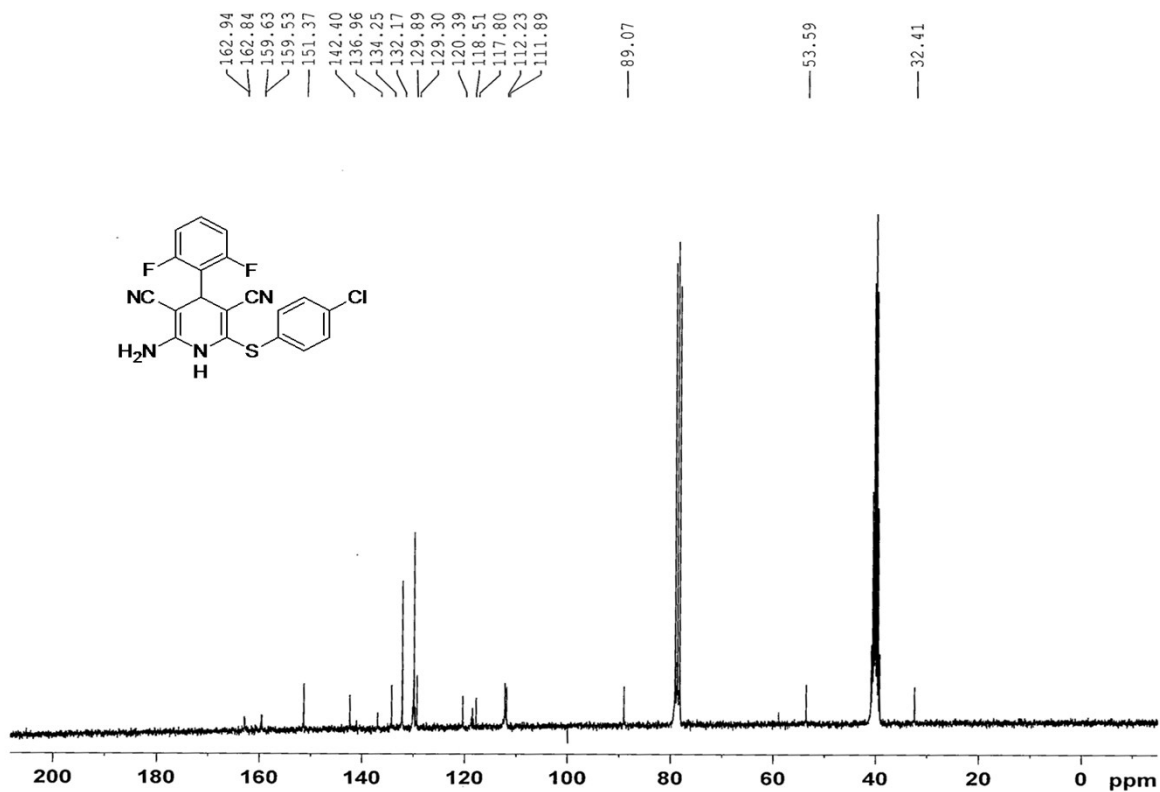

Spectrum 30.  $^{13}\text{C}$  – NMR of compound 4p

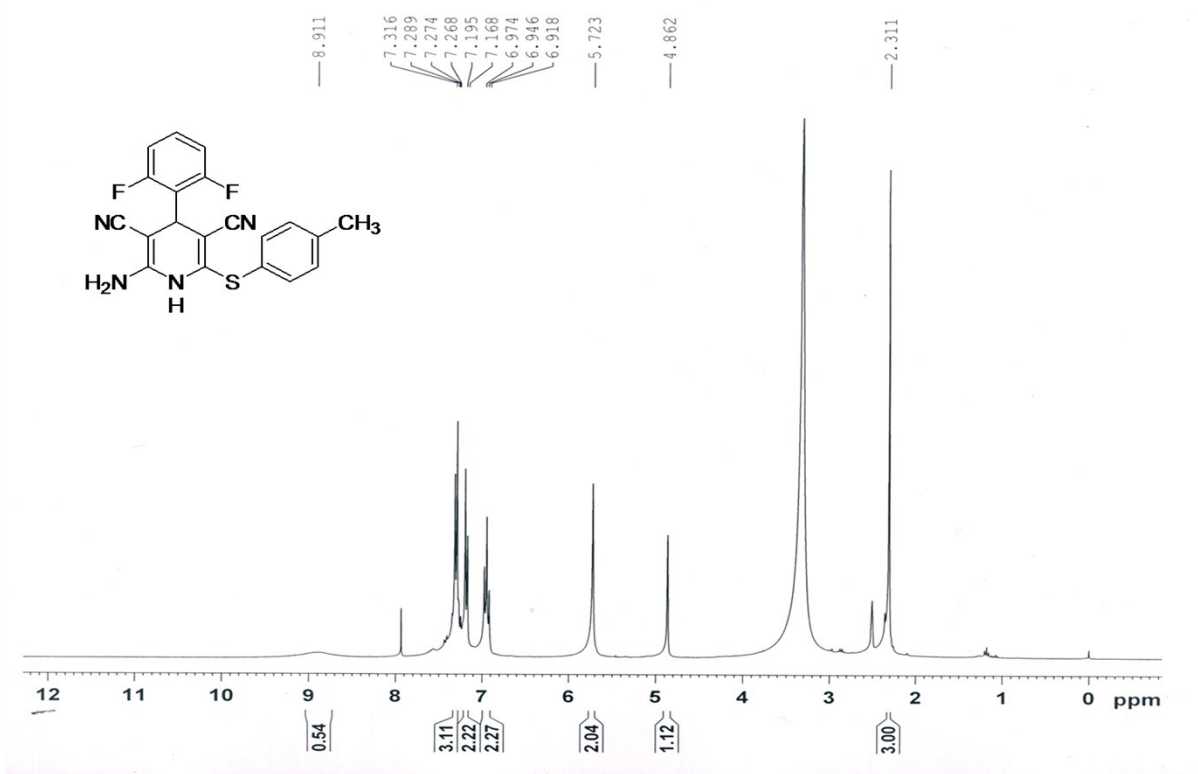

Spectrum 31. <sup>1</sup>H – NMR of compound 4q

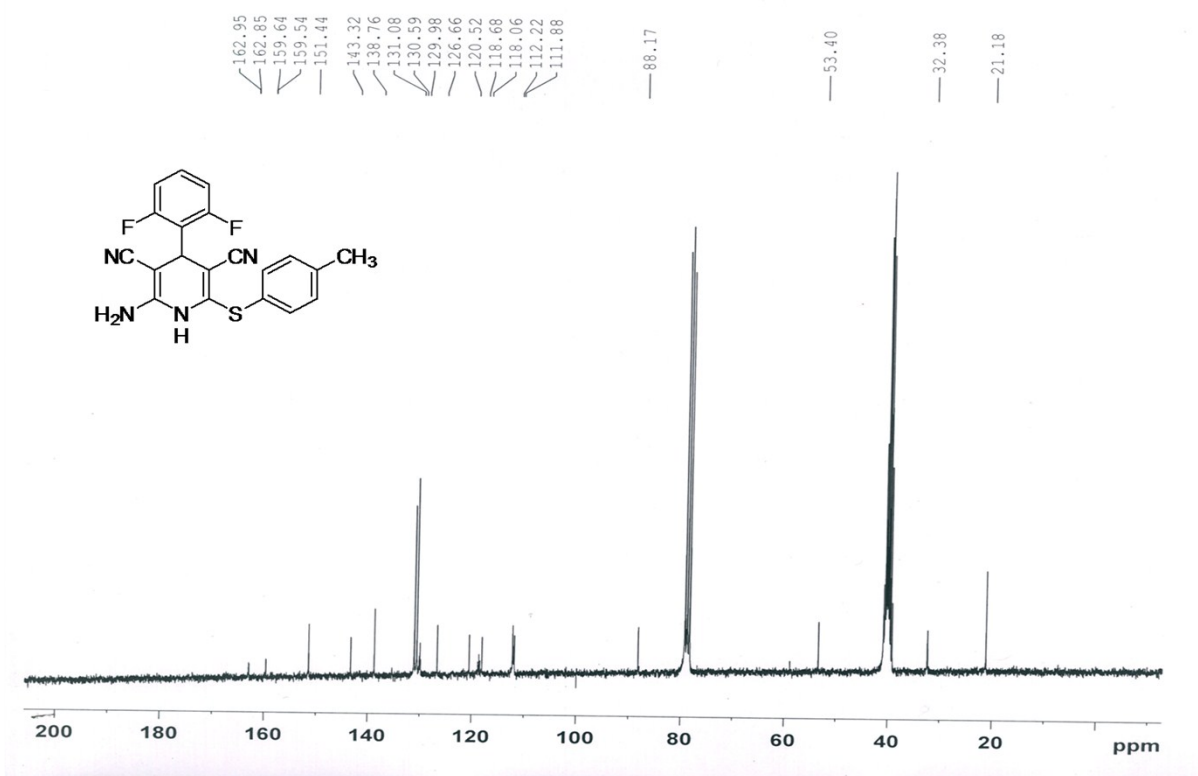

Spectrum 32. <sup>13</sup>C – NMR of compound 4q

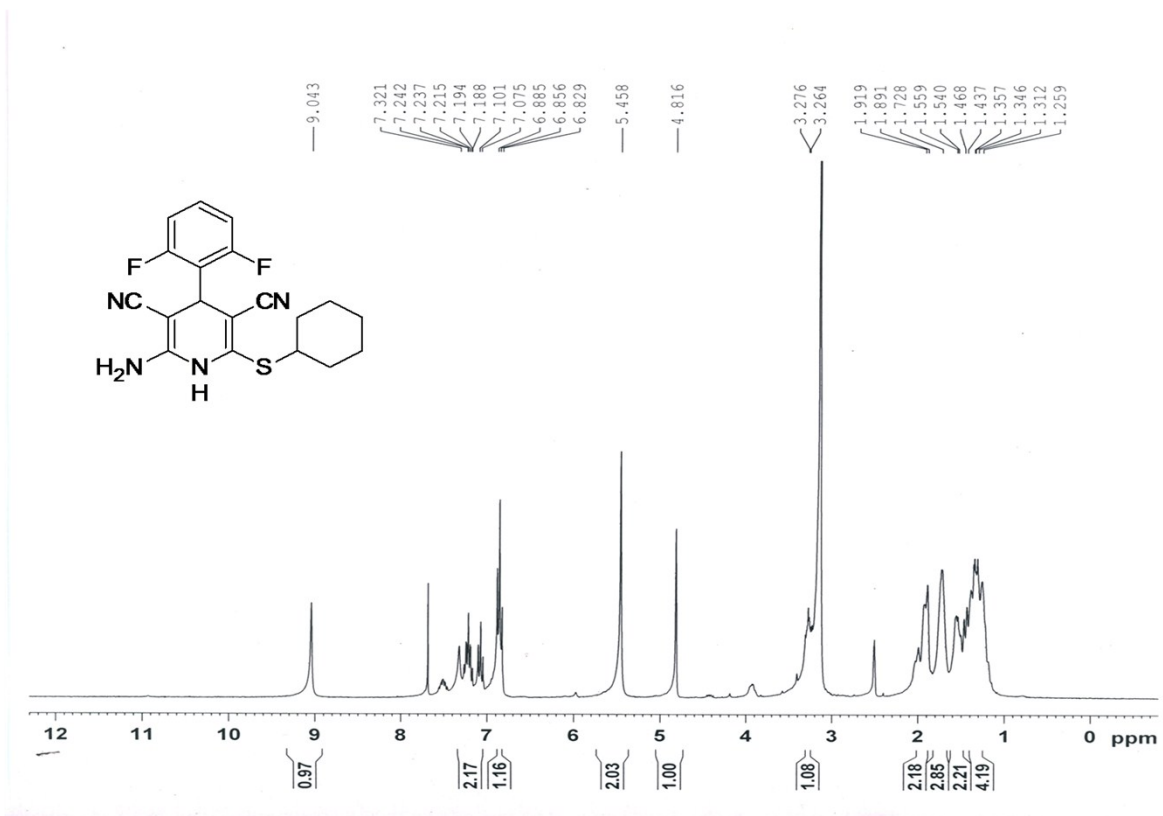

Spectrum 33. <sup>1</sup>H – NMR of compound 4r
